# Supplementary material for: Dehydrogenation of ammonia–borane to functionalize neutral and Li+-encapsulated C60, C70and C36fullerene cages: a DFT approach
Source: Royal Society of Chemistry journal article supplement (doi:10.1039/d1cp05770g), 2022-01-01
Supplement: d1cp05770g1.pdf [file d1cp05770g1.pdf]

**Dehydrogenation of Ammonia-Borane to functionalize neutral and Li<sup>+</sup>-encapsulated  
C<sub>60</sub>, C<sub>70</sub> and C<sub>36</sub> fullerene cages: A DFT approach**

Avik Ghosh<sup>a</sup>, Soumadip Banerjee<sup>a</sup>, Tanay Debnath<sup>\*\*</sup>, Abhijit K. Das<sup>\*</sup>

School of Mathematical & Computational Sciences, Indian Association for the Cultivation of  
Science, Jadavpur, Kolkata-700032

**a:** both have contributed equally

**\***Corresponding Author E-mail: [spakd@iacs.res.in](mailto:spakd@iacs.res.in)

**\*\***Corresponding Author E-mail: [tanay.iitk@gmail.com](mailto:tanay.iitk@gmail.com)

**Table S1** M06-2X/6-31G(d) calculated WBI values of concerned C-C and B-N (wherever applicable) bonds in the initial adduct and hydrogenated end products (neutral).

| Complex       | Bond Connectivity |       |      |                 |       |      |                 |       |       |      |
|---------------|-------------------|-------|------|-----------------|-------|------|-----------------|-------|-------|------|
|               | C <sub>60</sub>   |       |      | C <sub>70</sub> |       |      | C <sub>36</sub> |       |       |      |
|               | (6-5)             | (6-6) | B-N  | (6-5)           | (6-6) | B-N  | (6-5)           | (6-6) | (5-5) | B-N  |
| Adduct        | 1                 | 1.17  | 0.62 | 1               | 1.16  | 0.63 | 1.08            | 1.01  | 0.93  | 0.63 |
| (6-6) Product | -                 | 0.79  | -    | -               | 0.79  | -    | -               | 0.79  | -     | -    |
| (6-5) Product | 0.77              | -     | -    | 0.77            | -     | -    | 0.78            | -     | -     | -    |
| (5-5) Product | -                 | -     | -    | -               | -     | -    | -               | -     | 0.78  | -    |

**Table S2** M06-2X/6-31G(d) calculated WBI values of concerned C-C and B-N (wherever applicable) bonds in the initial adduct, intermediate and hydrogenated end products (Li<sup>+</sup>-encapsulated).

| System             | Complex                                            | Bond Connectivity |       |       |      |
|--------------------|----------------------------------------------------|-------------------|-------|-------|------|
|                    |                                                    | (6-5)             | (6-6) | (5-5) | B-N  |
| Li@C <sub>60</sub> | <i>Li@C<sub>60</sub><sup>AB</sup></i>              | 0.99              | 1.16  | -     | 0.62 |
|                    | <i>Li@C<sub>60</sub><sup>6-5</sup></i>             | 0.76              | -     | -     | -    |
|                    | <i>Li@C<sub>60</sub><sup>6-6</sup><sub>1</sub></i> | 0.89              | 0.93  | -     | 0.65 |
|                    | <i>Li@C<sub>60</sub><sup>6-6</sup></i>             | -                 | 0.79  | -     | -    |
| Li@C <sub>70</sub> | <i>Li@C<sub>70</sub><sup>AB</sup></i>              | 1.01              | 1.12  | -     | 0.63 |
|                    | <i>Li@C<sub>70</sub><sup>6-5</sup></i>             | 0.76              | -     | -     | -    |
|                    | <i>Li@C<sub>70</sub><sup>6-6</sup><sub>1</sub></i> | 0.91              | 0.91  | -     | 0.64 |
|                    | <i>Li@C<sub>70</sub><sup>6-6</sup></i>             | -                 | 0.79  | -     | -    |
| Li@C <sub>36</sub> | <i>Li@C<sub>36</sub><sup>AB</sup></i>              | 1.08              | 1.01  | 0.92  | 0.64 |
|                    | <i>Li@C<sub>36</sub><sup>6-6</sup><sub>1</sub></i> | 0.86              | 0.86  | -     | 0.63 |
|                    | <i>Li@C<sub>36</sub><sup>6-6</sup></i>             | -                 | 0.79  | -     | -    |
|                    | <i>Li@C<sub>36</sub><sup>6-5</sup><sub>1</sub></i> | 0.88              | 0.85  | -     | 0.64 |
|                    | <i>Li@C<sub>36</sub><sup>6-5</sup></i>             | 0.78              | -     | -     | -    |
|                    | <i>Li@C<sub>36</sub><sup>5-5</sup><sub>1</sub></i> | 0.85              | -     | 0.85  | 0.63 |
|                    | <i>Li@C<sub>36</sub><sup>5-5</sup></i>             | -                 | -     | 0.78  | -    |

**Table S3** TST calculated Rate constant values (k) (in sec<sup>-1</sup>) of (6-6) & (6-5) hydrogenation reaction for the neutral fullerene systems at a temperature range of 100 K – 1000 K.

| T (K) | C <sub>60</sub>        |                        | C <sub>70</sub>        |                        | C <sub>36</sub>        |                        |
|-------|------------------------|------------------------|------------------------|------------------------|------------------------|------------------------|
|       | (6-6)                  | (6-5)                  | (6-6)                  | (6-5)                  | (6-6)                  | (6-5)                  |
| 100   | 7.88x10 <sup>-22</sup> | 2.79x10 <sup>-47</sup> | 1.34x10 <sup>-23</sup> | 1.30x10 <sup>-32</sup> | 4.10x10 <sup>-41</sup> | 2.67x10 <sup>-04</sup> |
| 200   | 6.46x10 <sup>-06</sup> | 1.08x10 <sup>-18</sup> | 6.28x10 <sup>-07</sup> | 1.97x10 <sup>-11</sup> | 2.64x10 <sup>-15</sup> | 5.84x10 <sup>+03</sup> |
| 300   | 1.13x10 <sup>+00</sup> | 3.11x10 <sup>-09</sup> | 1.92x10 <sup>-01</sup> | 1.85x10 <sup>-04</sup> | 1.01x10 <sup>-06</sup> | 1.51x10 <sup>+06</sup> |
| 400   | 4.55x10 <sup>+02</sup> | 1.60x10 <sup>-04</sup> | 1.02x10 <sup>+02</sup> | 5.30x10 <sup>-01</sup> | 1.99x10 <sup>-02</sup> | 2.40x10 <sup>+07</sup> |
| 500   | 1.65x10 <sup>+04</sup> | 1.08x10 <sup>-01</sup> | 4.32x10 <sup>+03</sup> | 6.19x10 <sup>+01</sup> | 7.55x10 <sup>+00</sup> | 1.26x10 <sup>+08</sup> |
| 600   | 1.82x10 <sup>+05</sup> | 8.35x10 <sup>+00</sup> | 5.29x10 <sup>+04</sup> | 1.48x10 <sup>+03</sup> | 4.01x10 <sup>+02</sup> | 3.82x10 <sup>+08</sup> |
| 700   | 1.02x10 <sup>+06</sup> | 1.90x10 <sup>+02</sup> | 3.19x10 <sup>+05</sup> | 1.44x10 <sup>+04</sup> | 6.93x10 <sup>+03</sup> | 8.50x10 <sup>+08</sup> |
| 800   | 3.75x10 <sup>+06</sup> | 2.00x10 <sup>+03</sup> | 1.23x10 <sup>+06</sup> | 7.97x10 <sup>+04</sup> | 5.94x10 <sup>+04</sup> | 1.56x10 <sup>+09</sup> |
| 900   | 1.04x10 <sup>+07</sup> | 1.26x10 <sup>+04</sup> | 3.57x10 <sup>+06</sup> | 3.04x10 <sup>+05</sup> | 3.18x10 <sup>+05</sup> | 2.50x10 <sup>+09</sup> |
| 1000  | 2.36x10 <sup>+07</sup> | 5.54x10 <sup>+04</sup> | 8.38x10 <sup>+06</sup> | 8.94x10 <sup>+05</sup> | 1.23x10 <sup>+06</sup> | 3.67x10 <sup>+09</sup> |

**Table S4** Rate constant values (k) (in sec<sup>-1</sup>) of Li@C<sub>36</sub>–hydrogenation (Rate Determining Steps; r.d.s) at a temperature range of 100 K – 1000 K.

| T (K) | Li@C <sub>36</sub>     |                        |                        |
|-------|------------------------|------------------------|------------------------|
|       | (6-6)                  | (6-5)                  | (5-5)                  |
| 100   | 1.55x10 <sup>-99</sup> | 5.70x10 <sup>-45</sup> | 5.14x10 <sup>-60</sup> |
| 200   | 5.03x10 <sup>-43</sup> | 4.20x10 <sup>-16</sup> | 1.51x10 <sup>-24</sup> |
| 300   | 4.97x10 <sup>-24</sup> | 2.05x10 <sup>-06</sup> | 9.38x10 <sup>-13</sup> |
| 400   | 1.82x10 <sup>-14</sup> | 1.53x10 <sup>-01</sup> | 7.43x10 <sup>-07</sup> |
| 500   | 1.09x10 <sup>-08</sup> | 1.34x10 <sup>+02</sup> | 2.62x10 <sup>-03</sup> |
| 600   | 8.09x10 <sup>-05</sup> | 1.25x10 <sup>+04</sup> | 6.18x10 <sup>-01</sup> |
| 700   | 4.89x10 <sup>-02</sup> | 3.26x10 <sup>+05</sup> | 3.11x10 <sup>+01</sup> |
| 800   | 6.11x10 <sup>+00</sup> | 3.81x10 <sup>+06</sup> | 5.96x10 <sup>+02</sup> |
| 900   | 2.66x10 <sup>+02</sup> | 2.60x10 <sup>+07</sup> | 5.99x10 <sup>+03</sup> |
| 1000  | 5.51x10 <sup>+03</sup> | 1.22x10 <sup>+08</sup> | 3.82x10 <sup>+04</sup> |

**Table S5** Rate constant values (k) (in sec<sup>-1</sup>) of Li@C<sub>60</sub>-hydrogenation procedure [r.d.s for (6-6) & (6-5) hydrogenation along with (6-5)\_Single Step addition] at a temperature range of 100 K – 1000 K.

| T(K) | Li@C <sub>60</sub>     |                        |                        |
|------|------------------------|------------------------|------------------------|
|      | (6-6)                  | (6-5)                  | (6-5)_Single           |
| 100  | 4.82x10 <sup>-16</sup> | 1.66x10 <sup>-39</sup> | 3.56x10 <sup>-35</sup> |
| 200  | 1.75x10 <sup>-02</sup> | 1.47x10 <sup>-13</sup> | 3.55x10 <sup>-12</sup> |
| 300  | 5.70x10 <sup>+02</sup> | 7.80x10 <sup>-05</sup> | 1.51x10 <sup>-04</sup> |
| 400  | 1.04x10 <sup>+05</sup> | 1.95x10 <sup>+00</sup> | 9.76x10 <sup>-01</sup> |
| 500  | 2.39x10 <sup>+06</sup> | 8.92x10 <sup>+02</sup> | 1.92x10 <sup>+02</sup> |
| 600  | 1.96x10 <sup>+07</sup> | 5.47x10 <sup>+04</sup> | 6.62x10 <sup>+03</sup> |
| 700  | 8.88x10 <sup>+07</sup> | 1.06x10 <sup>+06</sup> | 8.44x10 <sup>+04</sup> |
| 800  | 2.78x10 <sup>+08</sup> | 9.90x10 <sup>+06</sup> | 5.77x10 <sup>+05</sup> |
| 900  | 6.80x10 <sup>+08</sup> | 5.71x10 <sup>+07</sup> | 2.60x10 <sup>+06</sup> |
| 1000 | 1.40x10 <sup>+09</sup> | 2.34x10 <sup>+08</sup> | 8.76x10 <sup>+06</sup> |

**Table S6** Rate constant values (k) (in sec<sup>-1</sup>) of Li@C<sub>70</sub>-hydrogenation [r.d.s for (6-6) & (6-5) hydrogenation along with (6-5)\_Single Step addition] at a temperature range of 100 K – 1000 K.

| T (K) | Li@C <sub>70</sub>     |                        |                        |
|-------|------------------------|------------------------|------------------------|
|       | (6-6)                  | (6-5)                  | (6-5)_Single           |
| 100   | 6.51x10 <sup>-19</sup> | 2.89x10 <sup>-49</sup> | 4.61x10 <sup>-24</sup> |
| 200   | 2.46x10 <sup>-04</sup> | 4.61x10 <sup>-18</sup> | 3.56x10 <sup>-07</sup> |
| 300   | 1.69x10 <sup>+01</sup> | 1.27x10 <sup>-07</sup> | 1.25x10 <sup>-01</sup> |
| 400   | 4.44x10 <sup>+03</sup> | 2.14x10 <sup>-02</sup> | 6.98x10 <sup>+01</sup> |
| 500   | 1.27x10 <sup>+05</sup> | 2.90x10 <sup>+01</sup> | 3.06x10 <sup>+03</sup> |
| 600   | 1.20x10 <sup>+06</sup> | 3.53x10 <sup>+03</sup> | 3.81x10 <sup>+04</sup> |
| 700   | 5.99x10 <sup>+06</sup> | 1.08x10 <sup>+05</sup> | 2.32x10 <sup>+05</sup> |
| 800   | 2.02x10 <sup>+07</sup> | 1.40x10 <sup>+06</sup> | 9.02x10 <sup>+05</sup> |
| 900   | 5.23x10 <sup>+07</sup> | 1.02x10 <sup>+07</sup> | 2.61x10 <sup>+06</sup> |
| 1000  | 1.12x10 <sup>+08</sup> | 5.01x10 <sup>+07</sup> | 6.15x10 <sup>+06</sup> |

**Table S7** AIM analysis of all the initial adduct complexes, in course of hydrogenation procedure at M06-2X/6-31G(d) level.

| System             | BCP    | $\rho(\mathbf{r})$ | $\nabla^2\rho$ | G      | V       | H      | -G/V   |
|--------------------|--------|--------------------|----------------|--------|---------|--------|--------|
| C <sub>60</sub>    | C-H(B) | 0.0061             | 0.0193         | 0.0039 | -0.0029 | 0.0010 | 1.3277 |
|                    | C-H(N) | 0.0109             | 0.0358         | 0.0077 | -0.0064 | 0.0013 | 1.1974 |
| C <sub>70</sub>    | C-H(B) | 0.0066             | 0.0196         | 0.0039 | -0.0028 | 0.0010 | 1.3657 |
|                    | C-H(N) | 0.0106             | 0.0348         | 0.0074 | -0.0062 | 0.0012 | 1.2016 |
| C <sub>36</sub>    | C-H(B) | 0.0059             | 0.0169         | 0.0033 | -0.0024 | 0.0009 | 1.3748 |
|                    | C-H(B) | 0.0057             | 0.0169         | 0.0033 | -0.0024 | 0.0009 | 1.3922 |
|                    | C-H(N) | 0.0133             | 0.0394         | 0.0090 | -0.0082 | 0.0008 | 1.0987 |
| Li@C <sub>60</sub> | C-H(B) | 0.0089             | 0.0301         | 0.0061 | -0.0047 | 0.0014 | 1.3060 |
|                    | C-H(B) | 0.0090             | 0.0303         | 0.0061 | -0.0047 | 0.0014 | 1.3070 |
| Li@C <sub>70</sub> | C-H(B) | 0.0085             | 0.0299         | 0.0061 | -0.0048 | 0.0013 | 1.2754 |
| Li@C <sub>36</sub> | C-H(B) | 0.0097             | 0.0310         | 0.0062 | -0.0047 | 0.0015 | 1.3203 |
|                    | C-H(B) | 0.0091             | 0.0307         | 0.0062 | -0.0048 | 0.0015 | 1.3062 |

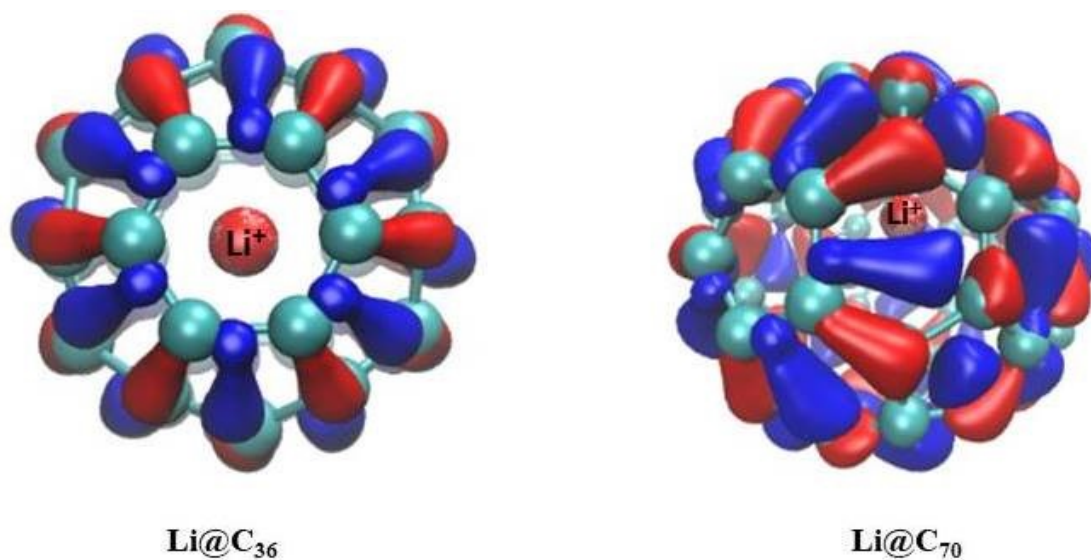

**Fig. S1** Difference map of electron density corresponding to  $\text{Li@C}_{36}$  &  $\text{Li@C}_{70}$ , calculated at M06-2X/6-31G(d) level, where red and blue iso-surfaces (+0.13 and -0.13 a.u., respectively) represent the region in which electron density is increased and decreased after  $\text{Li}^+$  confinement within the fullerene cages.

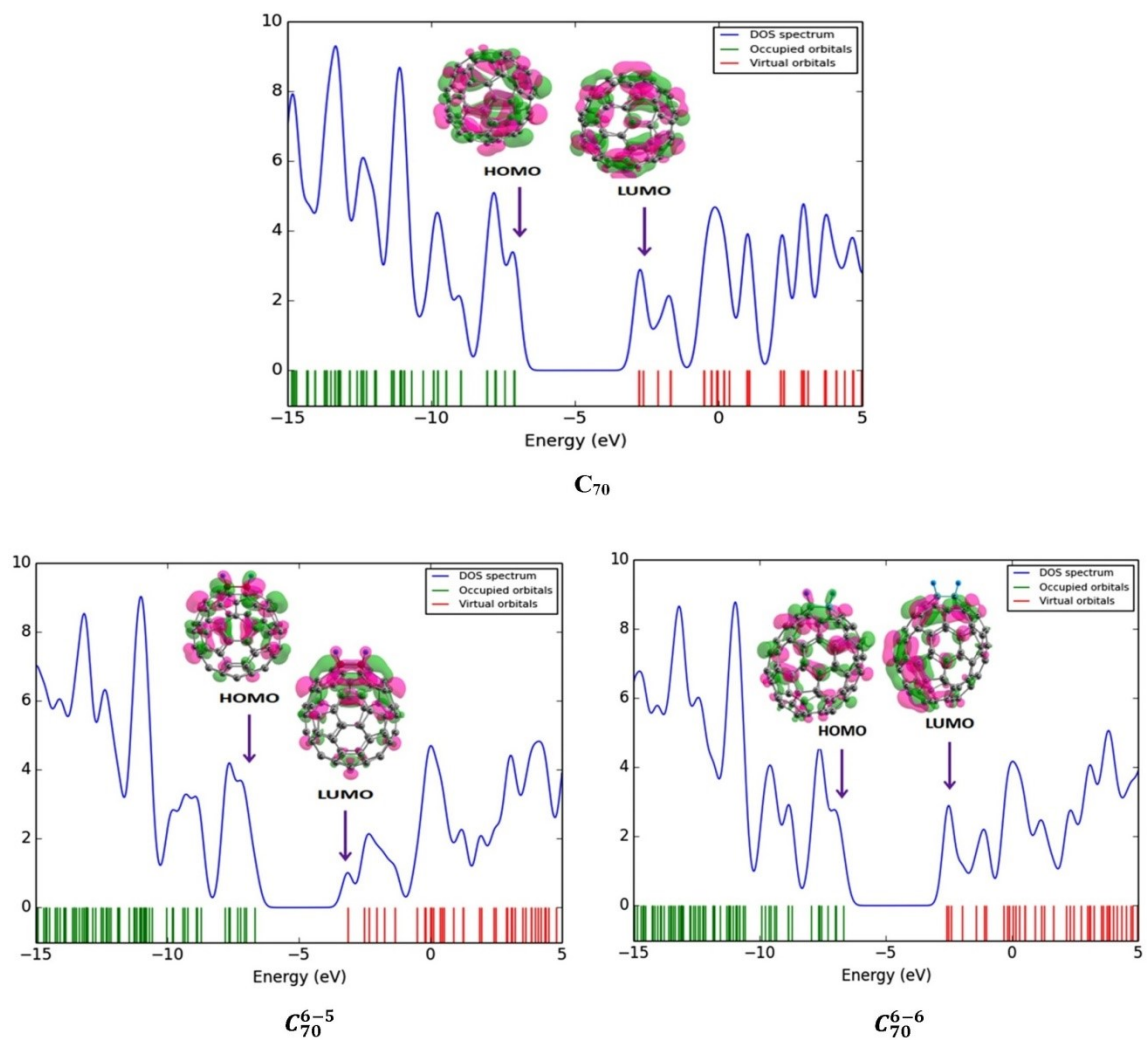

**Fig.S2** HOMO-LUMO distribution along with Density of States (DOS) of pristine  $C_{70}$  & its hydrogenated products.

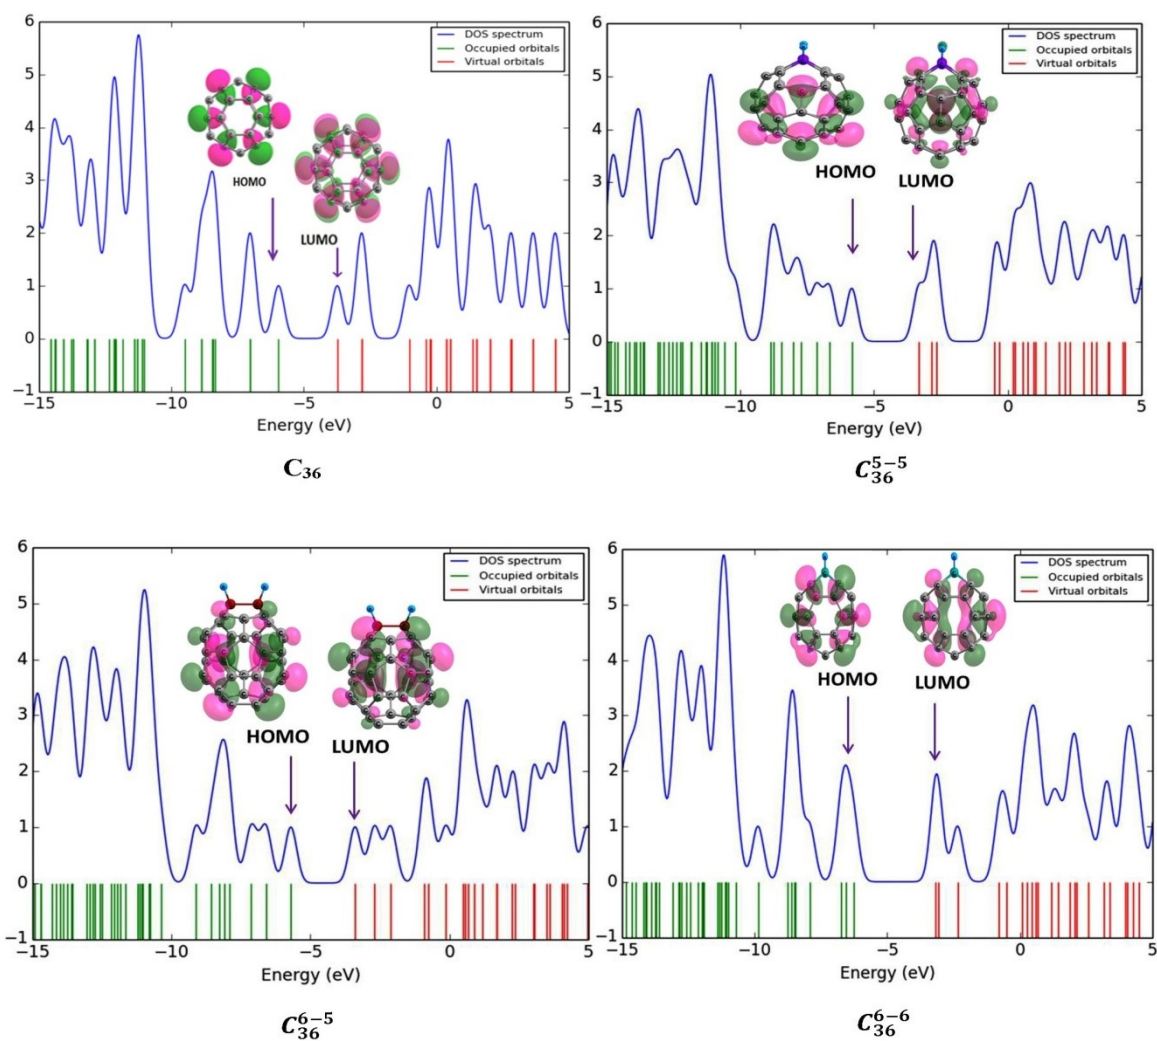

**Fig.S3** HOMO-LUMO distribution along with Density of States (DOS) of pristine  $C_{36}$  & its hydrogenated products.



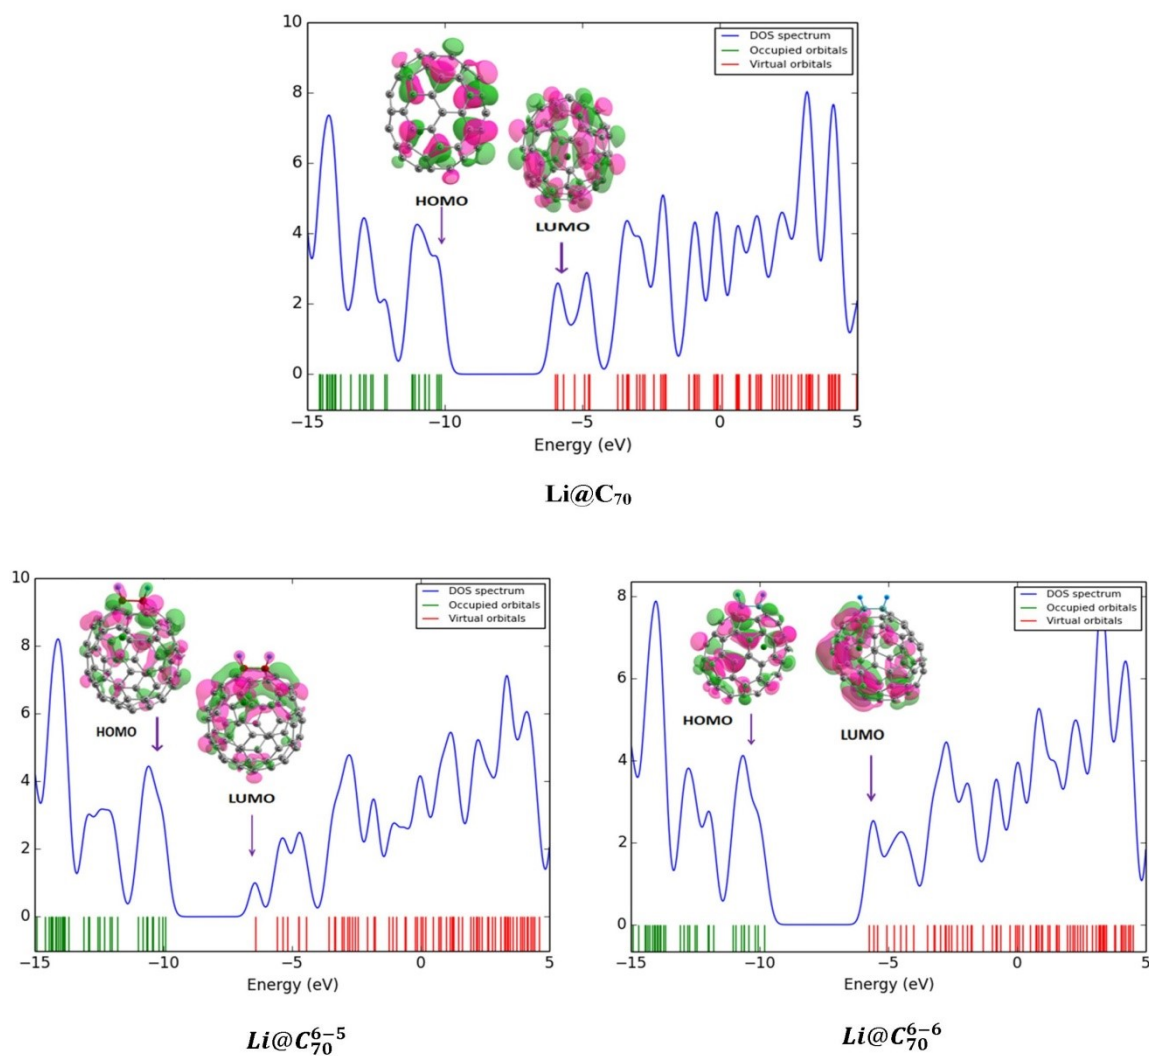

**Fig.S4** HOMO-LUMO distribution along with Density of States (DOS) of  $\text{Li@C}_{70}$  & its hydrogenated products.

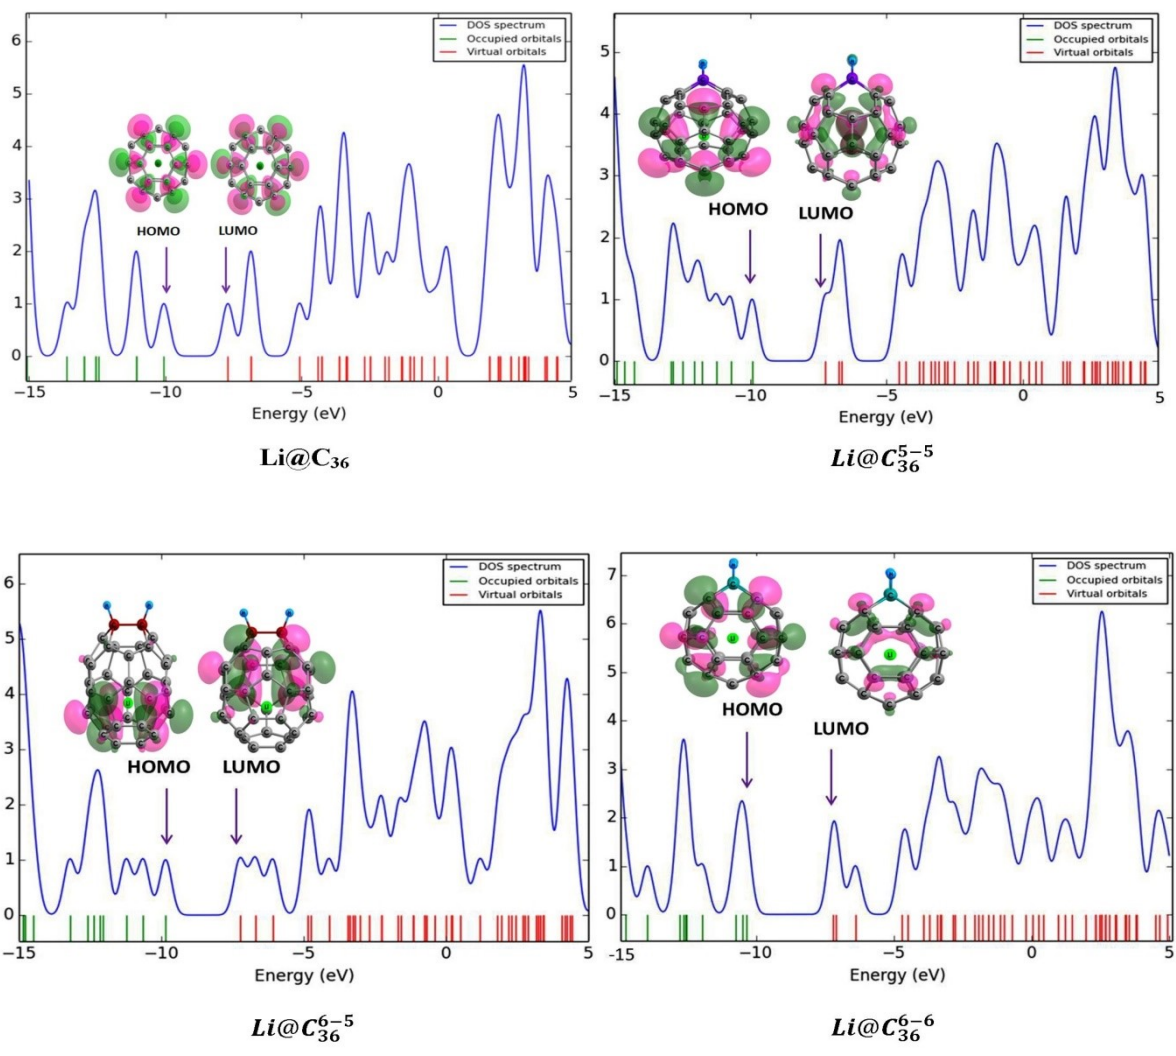

**Fig.S5** HOMO-LUMO distribution along with Density of States (DOS) of  $\text{Li@C}_{36}$  & its hydrogenated products.

**xyz coordinates of all reactants, TSs and products involved in the entire hydrogenation procedure:**

**C<sub>60</sub>**

0 1

|   |             |             |             |
|---|-------------|-------------|-------------|
| C | -1.47313400 | -2.98371700 | -1.20656900 |
| C | -1.94027600 | -2.00826900 | -2.17474200 |
| C | -1.04594500 | -1.43014600 | -3.06373000 |
| C | 0.35703900  | -1.80071400 | -3.02580500 |
| C | 0.80393000  | -2.73299400 | -2.10080400 |
| C | -0.13201900 | -3.33746200 | -1.17037000 |
| C | -2.20152100 | -2.77187500 | 0.03059900  |
| C | -3.11842000 | -1.66532300 | -0.17260900 |
| C | -2.95728800 | -1.19371700 | -1.53600600 |
| C | -3.03542800 | 0.16336200  | -1.81428300 |
| C | -1.12727700 | -0.01060300 | -3.35443000 |
| C | 1.14243300  | -0.60990600 | -3.29321500 |
| C | 2.34001400  | -0.40423700 | -2.62455500 |
| C | 2.80814700  | -1.37946000 | -1.65654800 |
| C | 2.05724000  | -2.51762800 | -1.40041600 |
| C | 1.89525000  | -2.98879900 | -0.03741900 |
| C | 0.54223500  | -3.49564500 | 0.10439400  |
| C | -0.15388600 | -3.29302100 | 1.28721800  |
| C | -1.55670300 | -2.92319800 | 1.24983000  |
| C | -3.35033400 | -0.75922300 | 0.85188400  |
| C | -2.67625500 | -0.91759000 | 2.12741600  |
| C | -1.79981100 | -1.97525200 | 2.32189800  |
| C | -0.54620100 | -1.75963200 | 3.02166200  |
| C | 0.47055700  | -2.57384400 | 2.38264600  |
| C | 1.76348800  | -2.08977800 | 2.24734900  |
| C | 2.49214400  | -2.30202200 | 1.00982400  |
| C | 3.27771400  | -1.11157600 | 0.74220500  |
| C | 3.43206500  | -0.66049400 | -0.56093200 |
| C | 0.22541500  | 0.49629500  | -3.49621000 |
| C | 2.20157100  | 2.77187500  | -0.03063800 |
| C | 1.55680600  | 2.92319000  | -1.24976900 |
| C | 0.15379900  | 3.29309200  | -1.28724100 |
| C | -0.54238100 | 3.49590300  | -0.10440700 |
| C | 0.13197200  | 3.33737900  | 1.17059400  |
| C | 1.94006000  | 2.00811200  | 2.17463900  |
| C | 2.95707700  | 1.19350800  | 1.53594200  |
| C | 3.11851600  | 1.66521200  | 0.17268700  |
| C | 3.35035000  | 0.75909000  | -0.85180200 |
| C | 2.67655500  | 0.91756600  | -2.12755400 |
| C | 1.79979000  | 1.97523300  | -2.32187300 |
| C | -0.47059700 | 2.57419500  | -2.38264000 |
| C | -1.76366900 | 2.09006100  | -2.24731100 |
| C | -2.49212100 | 2.30213000  | -1.00985200 |
| C | -1.89529500 | 2.98908600  | 0.03740200  |
| C | -2.05710100 | 2.51761400  | 1.40061600  |
| C | -0.80390900 | 2.73291900  | 2.10071000  |
| C | -0.35697700 | 1.80059000  | 3.02592200  |

|   |             |             |             |
|---|-------------|-------------|-------------|
| C | 1.04586700  | 1.43012600  | 3.06374400  |
| C | 3.03540500  | -0.16336000 | 1.81428400  |
| C | 2.09969200  | -0.76843000 | 2.74444900  |
| C | 1.12716500  | 0.01042900  | 3.35427700  |
| C | -0.22526300 | -0.49637400 | 3.49602500  |
| C | -1.14236500 | 0.60995600  | 3.29321300  |
| C | -2.33976500 | 0.40425400  | 2.62439800  |
| C | -2.80796400 | 1.37943300  | 1.65671800  |
| C | -3.43210900 | 0.66046900  | 0.56090000  |
| C | -3.27778800 | 1.11151300  | -0.74213000 |
| C | 0.54646700  | 1.75975800  | -3.02181300 |
| C | -2.10001500 | 0.76834200  | -2.74454100 |
| C | 1.47305500  | 2.98359200  | 1.20677200  |

$C_{60}^{AB}$

0 1

|   |             |             |             |
|---|-------------|-------------|-------------|
| C | -1.44383300 | 0.34072800  | -3.33832300 |
| C | -2.67333900 | 0.52958500  | -2.59057300 |
| C | -2.85079600 | 1.67269300  | -1.82531700 |
| C | -1.80700300 | 2.68052900  | -1.77163000 |
| C | -0.63145400 | 2.49942100  | -2.48549000 |
| C | -0.44622700 | 1.30323900  | -3.28686900 |
| C | -1.09806900 | -1.06740600 | -3.28497300 |
| C | -2.11365700 | -1.74887500 | -2.50256500 |
| C | -3.08778500 | -0.76181500 | -2.07389800 |
| C | -3.65989200 | -0.85343200 | -0.81303400 |
| C | -3.44953300 | 1.57708200  | -0.50667700 |
| C | -1.75994800 | 3.20619300  | -0.41993600 |
| C | -0.54034000 | 3.52906100  | 0.15725700  |
| C | 0.68972500  | 3.34082900  | -0.59028800 |
| C | 0.64456100  | 2.83741000  | -1.88218000 |
| C | 1.61864500  | 1.85094900  | -2.31077200 |
| C | 0.94416500  | 0.90259700  | -3.17933500 |
| C | 1.27531700  | -0.44364800 | -3.12950500 |
| C | 0.23141400  | -1.45091400 | -3.18206800 |
| C | -1.75492700 | -2.78434600 | -1.65177200 |
| C | -0.36384200 | -3.18510300 | -1.54285400 |
| C | 0.60641500  | -2.53394300 | -2.29125700 |
| C | 1.88126100  | -2.19505600 | -1.68571900 |
| C | 2.29436800  | -0.90310000 | -2.20315200 |
| C | 2.93852500  | 0.00343500  | -1.37500300 |
| C | 2.59482100  | 1.41243800  | -1.42844200 |
| C | 2.64299200  | 1.93883600  | -0.07721000 |
| C | 1.71123100  | 2.88057600  | 0.33280800  |
| C | -2.77508300 | 2.52484200  | 0.36176900  |
| C | 0.45452300  | 1.06831500  | 3.28420100  |
| C | -0.87489000 | 1.45174300  | 3.18138500  |
| C | -1.91867000 | 0.44370700  | 3.12728700  |
| C | -1.58803300 | -0.90271100 | 3.18035000  |
| C | -0.19719700 | -1.30335900 | 3.28699300  |
| C | 2.02816100  | -0.52882300 | 2.58866700  |
| C | 2.44425700  | 0.76322700  | 2.07322000  |
| C | 1.47064600  | 1.75004800  | 2.50338000  |

|   |             |             |             |
|---|-------------|-------------|-------------|
| C | 1.11157000  | 2.78439100  | 1.65175700  |
| C | -0.27933000 | 3.18480500  | 1.54306200  |
| C | -1.25035600 | 2.53440100  | 2.29116900  |
| C | -2.93873800 | 0.90435600  | 2.20316100  |
| C | -3.58352800 | -0.00148400 | 1.37363200  |
| C | -3.23699000 | -1.41012300 | 1.42867200  |
| C | -2.26128500 | -1.85020100 | 2.31136000  |
| C | -1.28738200 | -2.83694100 | 1.88209800  |
| C | -0.01179200 | -2.49979700 | 2.48654600  |
| C | 1.16415300  | -2.68149400 | 1.77271400  |
| C | 2.20808600  | -1.67490700 | 1.82842500  |
| C | 3.01589500  | 0.85675100  | 0.81374100  |
| C | 3.19528200  | -0.34005900 | 0.01251200  |
| C | 2.80520100  | -1.57814400 | 0.50776100  |
| C | 2.13111400  | -2.52708200 | -0.36191900 |
| C | 1.11681200  | -3.20743600 | 0.42057600  |
| C | -0.10294900 | -3.52997700 | -0.15731600 |
| C | -1.33263900 | -3.34135000 | 0.59048900  |
| C | -2.35350100 | -2.88059000 | -0.33311600 |
| C | -3.28338100 | -1.93654300 | 0.07696800  |
| C | -2.52614800 | 2.19599800  | 1.68635400  |
| C | -3.84474700 | 0.34253600  | -0.01202700 |
| C | 0.79983700  | -0.34029900 | 3.33765700  |
| N | 6.45122400  | -0.73015400 | 0.00928700  |
| H | 6.77672800  | -1.10138600 | -0.88236400 |
| H | 7.07742400  | -1.07105900 | 0.73748400  |
| H | 5.52013700  | -1.11234000 | 0.18736600  |
| B | 6.41758500  | 0.92407400  | -0.01341100 |
| H | 5.65431800  | 1.20839500  | -0.91110000 |
| H | 6.01467200  | 1.24170700  | 1.08294900  |
| H | 7.56010200  | 1.25479500  | -0.22881500 |

$C_{60}^{6-5}ts$

|     |             |             |             |
|-----|-------------|-------------|-------------|
| 0 1 |             |             |             |
| C   | -0.92946200 | 2.28455000  | -2.36849000 |
| C   | 0.19997500  | 3.01217300  | -1.82253600 |
| C   | 1.49240300  | 2.58674900  | -2.09103300 |
| C   | 1.71216400  | 1.41175900  | -2.91837300 |
| C   | 0.63248000  | 0.72343200  | -3.45180300 |
| C   | -0.71924700 | 1.17159600  | -3.17378400 |
| C   | -1.98990800 | 2.28896100  | -1.38747900 |
| C   | -1.51437900 | 3.04643000  | -0.21954100 |
| C   | -0.16015600 | 3.47086000  | -0.49304300 |
| C   | 0.80044200  | 3.48380800  | 0.51454700  |
| C   | 2.49079600  | 2.58959300  | -1.03770100 |
| C   | 2.84008800  | 0.68422900  | -2.37091900 |
| C   | 2.83428900  | -0.70591800 | -2.37119800 |
| C   | 1.70427700  | -1.42693000 | -2.92510200 |
| C   | 0.62743400  | -0.72859500 | -3.45377200 |
| C   | -0.72721500 | -1.16852000 | -3.18176800 |
| C   | -1.55291000 | 0.00891800  | -3.00103400 |
| C   | -2.56443200 | 0.02059700  | -2.03902400 |
| C   | -2.80919700 | 1.19291000  | -1.24232700 |

|   |             |             |             |
|---|-------------|-------------|-------------|
| C | -1.85121000 | 2.59032700  | 1.03938500  |
| C | -2.72771000 | 1.44537800  | 1.23378800  |
| C | -3.40994700 | 0.79401000  | 0.09612600  |
| C | -3.31767300 | -0.74148200 | 0.10102500  |
| C | -2.79016900 | -1.14743800 | -1.22127300 |
| C | -2.00771500 | -2.27064500 | -1.39666300 |
| C | -0.94667400 | -2.27966200 | -2.38305100 |
| C | 0.17772400  | -3.01671500 | -1.83482600 |
| C | 1.47375700  | -2.59881700 | -2.09927100 |
| C | 3.31629400  | 1.40609400  | -1.20697400 |
| C | 2.59850900  | -2.31046000 | 1.40013000  |
| C | 3.39822900  | -1.18982600 | 1.23764000  |
| C | 3.17494000  | -0.01406800 | 2.05953400  |
| C | 2.15746600  | -0.00944700 | 3.00154300  |
| C | 1.31455700  | -1.18178000 | 3.16847100  |
| C | 0.40923500  | -3.03048300 | 1.84337000  |
| C | 0.76639700  | -3.47347100 | 0.50911900  |
| C | 2.12300400  | -3.03500300 | 0.23403700  |
| C | 2.46622600  | -2.60470800 | -1.03875700 |
| C | 3.30769200  | -1.43312400 | -1.21026400 |
| C | 3.75978400  | -0.74017100 | -0.09557900 |
| C | 3.40812400  | 1.16057300  | 1.23750200  |
| C | 2.62102000  | 2.29001400  | 1.39967600  |
| C | 1.55898800  | 2.29832900  | 2.38974500  |
| C | 1.33093200  | 1.17098100  | 3.16911200  |
| C | -0.02511400 | 0.72923300  | 3.42536800  |
| C | -0.03304400 | -0.73421600 | 3.43964500  |
| C | -1.11625400 | -1.41631900 | 2.91408200  |
| C | -0.88542300 | -2.59376300 | 2.10094100  |
| C | -0.18293600 | -3.46572800 | -0.50390800 |
| C | -1.52753400 | -2.99885500 | -0.22645000 |
| C | -1.86926100 | -2.57751800 | 1.04334100  |
| C | -2.69842200 | -1.38672400 | 1.22005600  |
| C | -2.27172200 | -0.70264200 | 2.37510400  |
| C | -2.23878300 | 0.71836000  | 2.31958000  |
| C | -1.08956700 | 1.43151100  | 2.89965200  |
| C | -0.85809300 | 2.60383100  | 2.09618700  |
| C | 0.43882600  | 3.03434200  | 1.83979500  |
| C | 3.76905800  | 0.70930500  | -0.09514100 |
| C | 2.14714500  | 3.01980800  | 0.23508100  |
| C | 1.53886200  | -2.31443900 | 2.39375400  |
| N | -5.96581400 | -0.70305500 | 0.01091700  |
| H | -4.76044400 | -0.96074800 | 0.10030800  |
| H | -6.39067700 | -1.11213600 | 0.84159200  |
| H | -6.27211500 | -1.21506100 | -0.81491600 |
| B | -6.06080700 | 0.80049500  | -0.08942400 |
| H | -6.41381500 | 1.37164900  | 0.89452800  |
| H | -4.58172000 | 1.10779400  | 0.08219700  |
| H | -6.17824200 | 1.24024400  | -1.19052200 |

$C_{60}^{6-6}ts$

0 1

|   |             |            |            |
|---|-------------|------------|------------|
| C | -0.25931500 | 3.47440500 | 0.69295100 |
|---|-------------|------------|------------|

|   |             |             |             |
|---|-------------|-------------|-------------|
| C | 0.90846300  | 3.00519000  | 1.42013200  |
| C | 2.01962100  | 2.54292300  | 0.72561300  |
| C | 2.01960200  | 2.54295100  | -0.72555100 |
| C | 0.90843400  | 3.00524500  | -1.42003600 |
| C | -0.25933000 | 3.47443700  | -0.69281800 |
| C | -1.43761300 | 3.04277300  | 1.42001000  |
| C | -0.99693300 | 2.30918900  | 2.59298300  |
| C | 0.45365000  | 2.28889300  | 2.58832300  |
| C | 1.13438100  | 1.15205500  | 3.00651200  |
| C | 2.74872400  | 1.38643500  | 1.18087500  |
| C | 2.74867700  | 1.38647500  | -1.18086900 |
| C | 2.30044900  | 0.69218900  | -2.28205300 |
| C | 1.13432700  | 1.15217200  | -3.00649400 |
| C | 0.45360300  | 2.28899500  | -2.58824900 |
| C | -0.99698000 | 2.30929100  | -2.59288100 |
| C | -1.43764000 | 3.04283000  | -1.41987300 |
| C | -2.56608700 | 2.62830700  | -0.72570400 |
| C | -2.56607300 | 2.62827900  | 0.72584600  |
| C | -1.70310000 | 1.19277000  | 3.01765000  |
| C | -2.88373400 | 0.76179200  | 2.29531800  |
| C | -3.30515300 | 1.46236000  | 1.17351200  |
| C | -3.76457600 | 0.74293200  | 0.00004500  |
| C | -3.30517400 | 1.46240600  | -1.17340200 |
| C | -2.88377500 | 0.76188100  | -2.29524400 |
| C | -1.70315400 | 1.19288700  | -3.01757900 |
| C | -0.99106800 | 0.00759200  | -3.46313000 |
| C | 0.39637000  | -0.01117100 | -3.45493300 |
| C | 3.37008900  | 0.69047000  | -0.00002100 |
| C | 0.82352300  | -3.03681100 | -1.42409000 |
| C | 1.94515000  | -2.60926000 | -0.72220400 |
| C | 1.94515700  | -2.60928600 | 0.72205700  |
| C | 0.82354500  | -3.03686400 | 1.42395000  |
| C | -0.35343800 | -3.47275800 | 0.69380100  |
| C | -1.52024100 | -3.00891400 | -1.42093800 |
| C | -1.05779800 | -2.28816900 | -2.59516300 |
| C | 0.39217300  | -2.31673800 | -2.59894300 |
| C | 1.11074800  | -1.19668900 | -3.01090600 |
| C | 2.29647600  | -0.77502100 | -2.30445500 |
| C | 2.69167700  | -1.44951300 | -1.16209400 |
| C | 2.69166900  | -1.44954500 | 1.16197300  |
| C | 2.29651700  | -0.77510800 | 2.30438400  |
| C | 1.11080000  | -1.19680400 | 3.01083400  |
| C | 0.39221800  | -2.31683900 | 2.59884100  |
| C | -1.05775200 | -2.28827000 | 2.59508700  |
| C | -1.52021600 | -3.00896900 | 1.42084400  |
| C | -2.63491600 | -2.56263300 | 0.72613000  |
| C | -2.63492800 | -2.56260500 | -0.72618700 |
| C | -1.73743700 | -1.15663700 | -3.02359700 |
| C | -2.90222000 | -0.69067800 | -2.29530200 |
| C | -3.34403700 | -1.37824600 | -1.17401800 |
| C | -3.77980500 | -0.64482800 | 0.00001900  |
| C | -3.34401600 | -1.37829200 | 1.17402000  |
| C | -2.90217900 | -0.69076700 | 2.29532300  |
| C | -1.73738400 | -1.15675400 | 3.02357900  |
| C | -0.99100600 | 0.00745800  | 3.46314300  |

|   |             |             |             |
|---|-------------|-------------|-------------|
| C | 0.39643100  | -0.01130400 | 3.45492100  |
| C | 3.27108300  | -0.77628500 | -0.00004300 |
| C | 2.30049000  | 0.69209900  | 2.28203000  |
| C | -0.35344800 | -3.47272800 | -0.69393400 |
| N | 6.00070800  | -0.68851200 | 0.00002500  |
| H | 6.42136400  | -1.10671600 | 0.82896800  |
| H | 6.42118900  | -1.10676900 | -0.82898000 |
| H | 4.92617000  | -1.00244000 | 0.00013500  |
| B | 6.00975900  | 0.85818800  | -0.00002400 |
| H | 4.62739500  | 1.06777700  | -0.00009900 |
| H | 6.31444700  | 1.34083900  | 1.04781900  |
| H | 6.31455500  | 1.34078100  | -1.04786300 |

$C_{60}^{6-6}$

0 1

|   |             |             |             |
|---|-------------|-------------|-------------|
| C | -0.04279000 | 3.47871500  | 0.69329300  |
| C | 1.12960800  | 3.02534600  | 1.42193100  |
| C | 2.24670900  | 2.57371400  | 0.72521100  |
| C | 2.24673200  | 2.57380400  | -0.72494700 |
| C | 1.12965400  | 3.02551800  | -1.42163000 |
| C | -0.04276400 | 3.47878600  | -0.69295000 |
| C | -1.21473300 | 3.03036000  | 1.42054300  |
| C | -0.76163600 | 2.30252700  | 2.59286600  |
| C | 0.68850300  | 2.30619600  | 2.58829100  |
| C | 1.38980200  | 1.17448000  | 2.99433800  |
| C | 2.99369500  | 1.43200900  | 1.17429400  |
| C | 2.99382400  | 1.43215900  | -1.17411200 |
| C | 2.56386300  | 0.74115000  | -2.27608200 |
| C | 1.38987200  | 1.17476200  | -2.99414500 |
| C | 0.68856200  | 2.30644800  | -2.58806200 |
| C | -0.76158500 | 2.30277800  | -2.59266700 |
| C | -1.21469300 | 3.03050600  | -1.42027700 |
| C | -2.33638100 | 2.59822400  | -0.72588500 |
| C | -2.33641600 | 2.59815000  | 0.72609700  |
| C | -1.45212600 | 1.17574600  | 3.01724600  |
| C | -2.62448700 | 0.72731300  | 2.29444900  |
| C | -3.05800700 | 1.42200900  | 1.17348500  |
| C | -3.50493900 | 0.69467300  | 0.00000000  |
| C | -3.05797300 | 1.42213600  | -1.17339900 |
| C | -2.62444500 | 0.72752100  | -2.29441000 |
| C | -1.45207000 | 1.17601400  | -3.01712000 |
| C | -0.72170600 | 0.00034700  | -3.45714000 |
| C | 0.66504100  | 0.00003400  | -3.43882400 |
| C | 3.73257300  | 0.78981500  | 0.00008300  |
| C | 1.12825500  | -3.02578600 | -1.42190800 |
| C | 2.24556800  | -2.57463200 | -0.72514700 |
| C | 2.24557400  | -2.57472700 | 0.72499500  |
| C | 1.12824900  | -3.02596700 | 1.42166300  |
| C | -0.04435900 | -3.47873400 | 0.69293800  |
| C | -1.21609100 | -3.02987100 | -1.42056200 |
| C | -0.76266400 | -2.30217100 | -2.59287100 |
| C | 0.68746700  | -2.30649000 | -2.58825200 |
| C | 1.38932300  | -1.17511400 | -2.99430800 |



|   |             |             |             |
|---|-------------|-------------|-------------|
| C | 2.56355000  | -0.74210100 | -2.27627300 |
| C | 2.99312000  | -1.43337000 | -1.17428700 |
| C | 2.99325700  | -1.43353400 | 1.17423700  |
| C | 2.56348500  | -0.74229100 | 2.27616800  |
| C | 1.38926200  | -1.17539400 | 2.99416400  |
| C | 0.68742200  | -2.30675200 | 2.58806000  |
| C | -0.76272300 | -2.30242500 | 2.59265100  |
| C | -1.21610400 | -3.03000600 | 1.42024400  |
| C | -2.33756600 | -2.59726600 | 0.72583200  |
| C | -2.33757000 | -2.59718300 | -0.72614500 |
| C | -1.45260800 | -1.17507900 | -3.01725000 |
| C | -2.62479200 | -0.72615100 | -2.29447200 |
| C | -3.05861800 | -1.42066800 | -1.17352000 |
| C | -3.50526700 | -0.69315900 | -0.00006600 |
| C | -3.05863700 | -1.42080500 | 1.17331800  |
| C | -2.62483000 | -0.72635900 | 2.29432300  |
| C | -1.45268000 | -1.17534800 | 3.01706900  |
| C | -0.72178100 | -0.00001800 | 3.45712600  |
| C | 0.66496700  | -0.00034400 | 3.43883300  |
| C | 3.73244200  | -0.79141600 | -0.00003000 |
| C | 2.56381500  | 0.74094100  | 2.27627600  |
| C | -0.04436300 | -3.47869300 | -0.69328600 |
| H | 4.77943700  | -1.11572500 | -0.00020900 |
| H | 4.77983300  | 1.11374500  | 0.00024100  |

$C_{60}^{6-5}$

0 1

|   |             |             |             |
|---|-------------|-------------|-------------|
| C | -1.18741500 | 2.31119900  | -2.43891400 |
| C | -0.09016800 | 3.04458500  | -1.84918500 |
| C | 1.21850200  | 2.61451400  | -2.05187100 |
| C | 1.47890600  | 1.43417400  | -2.83394100 |
| C | 0.43482000  | 0.73559900  | -3.39394300 |
| C | -0.92590400 | 1.17662300  | -3.20143100 |
| C | -2.28971200 | 2.30333500  | -1.49330400 |
| C | -1.86365000 | 3.03316900  | -0.31049100 |
| C | -0.50205800 | 3.48784200  | -0.53569800 |
| C | 0.41487800  | 3.47180300  | 0.50979100  |
| C | 2.16897100  | 2.60384400  | -0.96143700 |
| C | 2.61198600  | 0.72459600  | -2.20586700 |
| C | 2.61203700  | -0.72731000 | -2.20480900 |
| C | 1.47903300  | -1.43781000 | -2.83199900 |
| C | 0.43489300  | -0.74007600 | -3.39297900 |
| C | -0.92581000 | -1.18094300 | -3.19990900 |
| C | -1.76411300 | -0.00210300 | -3.06937500 |
| C | -2.82102400 | -0.00153500 | -2.17287400 |
| C | -3.08383600 | 1.17495700  | -1.36239400 |
| C | -2.25389200 | 2.59955900  | 0.94647400  |
| C | -3.09206300 | 1.42016300  | 1.08479400  |
| C | -3.49935900 | 0.72401000  | -0.04547500 |
| C | -3.49929700 | -0.72432200 | -0.04453300 |
| C | -3.08373700 | -1.17696300 | -1.36086200 |
| C | -2.28951500 | -2.30544600 | -1.49029700 |
| C | -1.18723400 | -2.31451300 | -2.43589600 |

|   |             |             |             |
|---|-------------|-------------|-------------|
| C | -0.08993100 | -3.04707800 | -1.84523600 |
| C | 1.21869200  | -2.61712900 | -2.04842200 |
| C | 3.03507600  | 1.42671300  | -1.11131400 |
| C | 2.20814500  | -2.27015100 | 1.48099300  |
| C | 3.01946300  | -1.16755800 | 1.35552200  |
| C | 2.73646700  | 0.00150900  | 2.13362200  |
| C | 1.68874600  | 0.00209100  | 3.06591600  |
| C | 0.85896500  | -1.16447400 | 3.21298600  |
| C | 0.00376500  | -3.00997500 | 1.82571400  |
| C | 0.41514600  | -3.47108800 | 0.51429200  |
| C | 1.77592800  | -3.02853300 | 0.28952500  |
| C | 2.16922300  | -2.60489000 | -0.95803500 |
| C | 3.03516800  | -1.42792800 | -1.10940500 |
| C | 3.75633800  | -0.80242300 | 0.06319700  |
| C | 3.01935800  | 1.16958900  | 1.35405000  |
| C | 2.20796300  | 2.27228600  | 1.47810200  |
| C | 1.10821800  | 2.27576400  | 2.40973900  |
| C | 0.85885500  | 1.16877200  | 3.21148100  |
| C | -0.50423500 | 0.72839700  | 3.43558600  |
| C | -0.50415900 | -0.72391700 | 3.43649700  |
| C | -1.55927400 | -1.41812800 | 2.86234200  |
| C | -1.29981400 | -2.59177200 | 2.04442300  |
| C | -0.50180700 | -3.48863500 | -0.53115400 |
| C | -1.86342600 | -3.03373100 | -0.30653700 |
| C | -2.25368200 | -2.59847400 | 0.94985500  |
| C | -3.09195300 | -1.41895700 | 1.08663700  |
| C | -2.66300100 | -0.69488100 | 2.26526700  |
| C | -2.66306100 | 0.69766300  | 2.26437100  |
| C | -1.55941400 | 1.42177700  | 2.86053400  |
| C | -1.30002300 | 2.59435500  | 2.04105300  |
| C | 0.00351500  | 3.01241300  | 1.82182500  |
| C | 3.75625700  | 0.80277400  | 0.06211700  |
| C | 1.77569700  | 3.02904900  | 0.28559100  |
| C | 1.10840300  | -2.27246100 | 2.41265900  |
| H | 4.79739500  | 1.14344700  | 0.09707700  |
| H | 4.79750400  | -1.14298200 | 0.09869700  |

## C<sub>70</sub>

0 1

|   |             |             |             |
|---|-------------|-------------|-------------|
| C | -3.21870800 | -2.34554900 | -0.52936100 |
| C | -2.43928000 | -2.44761000 | -1.74247900 |
| C | -3.96589900 | -1.20308000 | -0.27163800 |
| C | -2.43903400 | -1.41077900 | -2.65211700 |
| C | -1.20108800 | -1.02045800 | -3.30196400 |
| C | -0.00002000 | -1.73987700 | -3.09647800 |
| C | 1.20097500  | -1.02034600 | -3.30220600 |
| C | -3.21882800 | -1.22838000 | 2.06701400  |
| C | -2.43893000 | -2.41353200 | 1.78937900  |
| C | -3.96599400 | -0.63039800 | 1.05986800  |
| C | -2.43894700 | -2.95829700 | 0.52227300  |
| C | -1.20082700 | -3.45566100 | -0.04942900 |
| C | 0.00006400  | -3.48345100 | 0.69877400  |
| C | 1.20081800  | -3.45603200 | -0.04953500 |
| C | 0.00004200  | -2.84394900 | -2.12690700 |

|   |             |             |             |
|---|-------------|-------------|-------------|
| C | -1.20079600 | -3.14125700 | -1.44003100 |
| C | 1.20076500  | -3.14162300 | -1.44004600 |
| C | -3.21924400 | 1.58624200  | 1.80707500  |
| C | -2.43900600 | 0.95602200  | 2.84810300  |
| C | -3.96649700 | 0.81346100  | 0.92697000  |
| C | -2.43878300 | -0.41720300 | 2.97451500  |
| C | -1.20072300 | -1.11472500 | 3.27090700  |
| C | 0.00007200  | -0.41176700 | 3.52788300  |
| C | 1.20089100  | -1.11483300 | 3.27099700  |
| C | 0.00008000  | -2.90193000 | 2.04808900  |
| C | -1.20071500 | -2.34024800 | 2.54276100  |
| C | 1.20092500  | -2.34029600 | 2.54289800  |
| C | -3.21864800 | 2.20841500  | -0.94997200 |
| C | -2.43892500 | 3.00373100  | -0.02862000 |
| C | -3.96621800 | 1.13287800  | -0.48727600 |
| C | -2.43893100 | 2.70000100  | 1.31641100  |
| C | -1.20081400 | 2.76645700  | 2.07127100  |
| C | 0.00009700  | 3.22847800  | 1.48227500  |
| C | 1.20100600  | 2.76651400  | 2.07132300  |
| C | 0.00007700  | 1.05076500  | 3.39202600  |
| C | -1.20063400 | 1.69512000  | 3.01104600  |
| C | 1.20078000  | 1.69520100  | 3.01111700  |
| C | -3.21883900 | -0.22122000 | -2.39400200 |
| C | -2.43902500 | 0.90128400  | -2.86558900 |
| C | -3.96631000 | -0.11373700 | -1.22797900 |
| C | -2.43862900 | 2.08649700  | -2.16091500 |
| C | -1.20073000 | 2.82505100  | -1.99067600 |
| C | -0.00001300 | 2.40702200  | -2.61213800 |
| C | 1.20070000  | 2.82509800  | -1.99078600 |
| C | 0.00002700  | 3.55203000  | 0.04916100  |
| C | -1.20075800 | 3.38798400  | -0.68132000 |
| C | 1.20075400  | 3.38800300  | -0.68145700 |
| C | -0.00006400 | 1.14400300  | -3.36270800 |
| C | -1.20105400 | 0.39888400  | -3.43291200 |
| C | 1.20094600  | 0.39892600  | -3.43308200 |
| C | 3.21865700  | 2.20837900  | -0.94998400 |
| C | 2.43862800  | 2.08648500  | -2.16093100 |
| C | 2.43886600  | 0.90127600  | -2.86568200 |
| C | 3.96627600  | 1.13275800  | -0.48743100 |
| C | 3.21928500  | 1.58621600  | 1.80690300  |
| C | 2.43899400  | 2.70000400  | 1.31631100  |
| C | 2.43890000  | 3.00376400  | -0.02872100 |
| C | 3.96661200  | 0.81340000  | 0.92680800  |
| C | 3.21874900  | -1.22838600 | 2.06673500  |
| C | 2.43887800  | -0.41729900 | 2.97444000  |
| C | 2.43910400  | 0.95598100  | 2.84791700  |
| C | 3.96620400  | -0.63034500 | 1.05988500  |
| C | 3.21850700  | -2.34545400 | -0.52946900 |
| C | 2.43868400  | -2.95834400 | 0.52225400  |
| C | 2.43904400  | -2.41360600 | 1.78926600  |
| C | 3.96594300  | -1.20309800 | -0.27176300 |
| C | 3.21851300  | -0.22130300 | -2.39405200 |
| C | 2.43874700  | -1.41081500 | -2.65210400 |
| C | 2.43901600  | -2.44773500 | -1.74264400 |
| C | 3.96628600  | -0.11371000 | -1.22825400 |

$C_{70}^{AB}$

0 1

|   |             |             |             |
|---|-------------|-------------|-------------|
| C | -3.68568600 | -0.46952900 | -0.25496300 |
| C | -3.11934800 | -1.05110100 | -1.45203100 |
| C | -3.78758900 | 0.91188900  | -0.12466900 |
| C | -2.67818100 | -0.23353000 | -2.47057600 |
| C | -1.44243800 | -0.54732200 | -3.16450800 |
| C | -0.71925200 | -1.73022600 | -2.88137500 |
| C | 0.66558300  | -1.69641600 | -3.16967300 |
| C | -3.01287300 | 0.75691900  | 2.19813600  |
| C | -2.90893300 | -0.67850500 | 2.05391400  |
| C | -3.44335900 | 1.54215000  | 1.13616500  |
| C | -3.23604900 | -1.27806500 | 0.85719400  |
| C | -2.41955600 | -2.35988000 | 0.34049000  |
| C | -1.33635700 | -2.88390100 | 1.08365700  |
| C | -0.31028600 | -3.50612500 | 0.33415000  |
| C | -1.19031300 | -2.60022100 | -1.79520700 |
| C | -2.34761400 | -2.22044600 | -1.07531400 |
| C | -0.23874300 | -3.36695900 | -1.08243800 |
| C | -1.69058500 | 3.18834500  | 1.62744000  |
| C | -1.24801400 | 2.36579600  | 2.73036400  |
| C | -2.76410000 | 2.78763300  | 0.84127600  |
| C | -1.89335900 | 1.17899400  | 3.00968500  |
| C | -1.12166400 | 0.00681400  | 3.37856300  |
| C | 0.28164100  | 0.07141600  | 3.55200700  |
| C | 0.98735100  | -1.14136400 | 3.37213600  |
| C | -0.98505500 | -2.24590300 | 2.36052100  |
| C | -1.74465300 | -1.13276900 | 2.79252000  |
| C | 0.36410200  | -2.28118800 | 2.78546200  |
| C | -1.54906500 | 3.46559400  | -1.18179500 |
| C | -0.43459700 | 3.87546200  | -0.35738300 |
| C | -2.69150500 | 2.92918800  | -0.60000900 |
| C | -0.50404600 | 3.74019300  | 1.01344700  |
| C | 0.65647700  | 3.27938800  | 1.75322900  |
| C | 1.89724500  | 3.05034800  | 1.11231100  |
| C | 2.76527800  | 2.13008500  | 1.74595200  |
| C | 0.96952900  | 1.33515300  | 3.25399800  |
| C | 0.20011000  | 2.43558600  | 2.80752000  |
| C | 2.30874600  | 1.28577400  | 2.79988400  |
| C | -2.78238900 | 1.20373800  | -2.34464300 |
| C | -1.59168700 | 1.76470400  | -2.94154700 |
| C | -3.32449600 | 1.77094700  | -1.19819300 |
| C | -0.98962900 | 2.86838600  | -2.37358700 |
| C | 0.45805000  | 2.93632500  | -2.29055300 |
| C | 1.27888800  | 1.93630000  | -2.86378400 |
| C | 2.56665200  | 1.78640300  | -2.29638300 |
| C | 1.97175700  | 3.19423600  | -0.34786700 |
| C | 0.79859500  | 3.55486700  | -1.05297400 |
| C | 2.90766400  | 2.40559700  | -1.05868900 |
| C | 0.63700000  | 0.76152800  | -3.46941700 |
| C | -0.77558400 | 0.67857100  | -3.45273200 |
| C | 1.33283000  | -0.47030100 | -3.45899300 |

|   |             |             |             |
|---|-------------|-------------|-------------|
| C | 4.10342700  | 0.38418000  | -1.19942200 |
| C | 3.29349300  | 0.53350300  | -2.38723500 |
| C | 2.69042500  | -0.56952500 | -2.95472400 |
| C | 4.27419800  | -0.86757900 | -0.62092600 |
| C | 3.96098700  | 0.10820300  | 1.60986200  |
| C | 3.77857400  | 1.40620700  | 1.00019300  |
| C | 3.84852500  | 1.54093200  | -0.37047700 |
| C | 4.20144100  | -1.00903100 | 0.81991800  |
| C | 2.63836700  | -2.32280100 | 2.18256400  |
| C | 2.38905100  | -1.15394300 | 2.99612000  |
| C | 3.03517000  | 0.03202900  | 2.71706000  |
| C | 3.52321400  | -2.25640100 | 1.11385100  |
| C | 1.96243800  | -3.54895600 | -0.27202400 |
| C | 1.04492200  | -3.60872500 | 0.84344000  |
| C | 1.37464800  | -3.01096400 | 2.04161000  |
| C | 3.17655800  | -2.88574300 | -0.14570100 |
| C | 2.86815500  | -1.87588200 | -2.36203900 |
| C | 1.60387800  | -2.56643000 | -2.48446800 |
| C | 1.16156700  | -3.38178800 | -1.46408700 |
| C | 3.64087800  | -2.02703800 | -1.21764900 |
| N | -6.84897300 | -1.41694300 | -0.08143300 |
| H | -7.33503300 | -1.33544200 | -0.97352200 |
| H | -7.52346400 | -1.23525400 | 0.66059600  |
| H | -6.13362200 | -0.68799100 | -0.04745500 |
| B | -6.16941600 | -2.91604900 | 0.08497700  |
| H | -5.37794100 | -3.00085200 | -0.82893800 |
| H | -5.64739500 | -2.90218000 | 1.17728000  |
| H | -7.09511900 | -3.68841800 | -0.00234400 |

$C_{70}^{6-5}ts$

0 1

|   |             |             |             |
|---|-------------|-------------|-------------|
| C | 2.52860900  | 1.92087900  | 2.27495000  |
| C | 1.28011800  | 2.03883100  | 2.98997600  |
| C | 2.78669500  | 2.72625000  | 1.17215600  |
| C | 0.33247200  | 2.94752200  | 2.57510900  |
| C | -1.07360900 | 2.57873600  | 2.57635100  |
| C | -1.51140300 | 1.33326100  | 3.08883000  |
| C | -2.73795600 | 0.84622100  | 2.57696700  |
| C | 3.71651100  | 0.78625100  | 0.00001500  |
| C | 3.48322300  | -0.02845100 | 1.16004100  |
| C | 3.38958900  | 2.14177900  | -0.00003500 |
| C | 2.87568100  | 0.52088000  | 2.25882800  |
| C | 1.84479000  | -0.21445800 | 2.99346200  |
| C | 1.48237800  | -1.53022000 | 2.61034900  |
| C | 0.18456200  | -1.94486900 | 2.98728200  |
| C | -0.50357400 | 0.36469000  | 3.53836800  |
| C | 0.87282500  | 0.71321900  | 3.43073300  |
| C | -0.79868000 | -1.00743100 | 3.44247100  |
| C | 2.51613700  | 1.94735800  | -2.27678800 |
| C | 2.86390300  | 0.54713100  | -2.27500500 |
| C | 2.78059700  | 2.74493400  | -1.17084100 |
| C | 3.43130400  | -0.02478900 | -1.15871400 |
| C | 3.15832600  | -1.40330200 | -0.76180400 |

|   |             |             |             |
|---|-------------|-------------|-------------|
| C | 2.10303900  | -2.11155800 | -1.45141300 |
| C | 1.40778100  | -3.10493600 | -0.75275700 |
| C | 2.11111700  | -2.13779000 | 1.44468600  |
| C | 3.24839700  | -1.46191400 | 0.75138900  |
| C | 1.39281900  | -3.06767400 | 0.70979700  |
| C | 0.57977600  | 3.80535700  | -1.40260600 |
| C | 0.31628500  | 2.98239700  | -2.55767800 |
| C | 1.78715400  | 3.69227100  | -0.71852600 |
| C | 1.26145000  | 2.07049300  | -2.98448700 |
| C | 0.85132700  | 0.75563000  | -3.43539300 |
| C | -0.51900300 | 0.39758100  | -3.52955000 |
| C | -0.81391300 | -0.97899000 | -3.44978300 |
| C | 1.46968000  | -1.50285100 | -2.62545300 |
| C | 1.82197000  | -0.17762700 | -2.98172000 |
| C | 0.16943200  | -1.91832600 | -2.99626600 |
| C | 0.58932000  | 3.78611900  | 1.42310200  |
| C | -0.65911500 | 3.90244700  | 0.70645400  |
| C | 1.78944200  | 3.68352800  | 0.73244000  |
| C | -0.66403500 | 3.90955600  | -0.67270600 |
| C | -1.69033000 | 3.17881500  | -1.39457000 |
| C | -2.75078800 | 2.52805600  | -0.71793900 |
| C | -3.35461000 | 1.44494100  | -1.39800500 |
| C | -1.52692300 | 1.36241100  | -3.06949500 |
| C | -1.08721800 | 2.60434300  | -2.54888600 |
| C | -2.74916800 | 0.86819500  | -2.55435500 |
| C | -2.74590700 | 2.52027300  | 0.75128400  |
| C | -1.67895500 | 3.16120500  | 1.42864200  |
| C | -3.34392600 | 1.43007400  | 1.42411000  |
| C | -3.86727100 | -0.85245800 | -1.41124000 |
| C | -4.03590500 | 0.38478800  | -0.67988300 |
| C | -4.03440000 | 0.37858500  | 0.69949300  |
| C | -3.69114500 | -2.05111600 | -0.72821700 |
| C | -1.91885000 | -2.70261000 | -2.29572300 |
| C | -2.10489400 | -1.45130600 | -2.99939000 |
| C | -3.05854800 | -0.54906500 | -2.56657700 |
| C | -2.69745700 | -2.99951700 | -1.18295900 |
| C | -0.70503800 | -3.84188900 | -0.01560900 |
| C | 0.10087300  | -3.53473600 | -1.17971000 |
| C | -0.50312500 | -2.98620300 | -2.30050500 |
| C | -2.06983800 | -3.58261300 | -0.01207500 |
| C | -1.91622900 | -2.72097700 | 2.28462500  |
| C | -0.49579600 | -2.99226300 | 2.27158000  |
| C | 0.09409000  | -3.53509800 | 1.14611700  |
| C | -2.68851200 | -3.00560600 | 1.16653200  |
| C | -3.86118600 | -0.86435900 | 1.41658700  |
| C | -3.04657300 | -0.57014200 | 2.57517700  |
| C | -2.09809600 | -1.47807200 | 2.99998500  |
| C | -3.68862400 | -2.05522500 | 0.72259800  |
| N | 5.37997500  | -2.90870200 | -0.70770600 |
| H | 4.45656900  | -2.26007400 | -0.98324100 |
| H | 6.17569600  | -2.47502800 | -1.17415300 |
| H | 5.20233500  | -3.82115600 | -1.12698300 |
| B | 5.45793200  | -2.91539800 | 0.81761700  |
| H | 6.28046500  | -2.19146200 | 1.28585500  |
| H | 4.26786100  | -2.09680500 | 1.07972400  |

H 5.08117300 -3.91696400 1.34173500

$C_{70}^{6-6}ts$

0 1

|   |             |             |             |
|---|-------------|-------------|-------------|
| C | 3.03057000  | 0.32672400  | -2.29048900 |
| C | 2.63952800  | -1.07905300 | -2.26177600 |
| C | 3.60897600  | 0.87880100  | -1.15885300 |
| C | 2.89171400  | -1.86115400 | -1.16840100 |
| C | 1.88476900  | -2.78794300 | -0.71212300 |
| C | 0.69613500  | -3.02722900 | -1.44493900 |
| C | -0.40671200 | -3.52656400 | -0.71160600 |
| C | 2.20318400  | 2.88471700  | -1.41812300 |
| C | 1.58548000  | 2.29328800  | -2.57003600 |
| C | 3.19279000  | 2.19106500  | -0.71993200 |
| C | 1.98262400  | 1.03138000  | -2.97963200 |
| C | 0.98303900  | 0.07359200  | -3.41758400 |
| C | -0.38544500 | 0.42031400  | -3.52219800 |
| C | -1.30820900 | -0.64889700 | -3.43219400 |
| C | 0.43774800  | -2.20834400 | -2.62949100 |
| C | 1.38607000  | -1.21905300 | -2.97765500 |
| C | -0.90422400 | -1.94256900 | -2.99320100 |
| C | 2.20311600  | 2.88514000  | 1.41740400  |
| C | 1.16831300  | 3.58548400  | 0.68940700  |
| C | 3.19275800  | 2.19127800  | 0.71947200  |
| C | 1.16834600  | 3.58527800  | -0.69038700 |
| C | -0.08241300 | 3.43783600  | -1.41210500 |
| C | -1.32422900 | 3.38058700  | -0.73577800 |
| C | -2.37287700 | 2.71399300  | -1.41187300 |
| C | -0.80737500 | 1.75498700  | -3.07483200 |
| C | 0.17355000  | 2.63628700  | -2.56332400 |
| C | -2.11693700 | 1.91178700  | -2.56093200 |
| C | 3.03045300  | 0.32740700  | 2.29057200  |
| C | 1.98247300  | 1.03226900  | 2.97945100  |
| C | 3.60892800  | 0.87914100  | 1.15880500  |
| C | 1.58534900  | 2.29405300  | 2.56945800  |
| C | 0.17342100  | 2.63705000  | 2.56257500  |
| C | -0.80753100 | 1.75590300  | 3.07429500  |
| C | -2.11706800 | 1.91255000  | 2.56028200  |
| C | -1.32426600 | 3.38080600  | 0.73473200  |
| C | -0.08248400 | 3.43825700  | 1.41110600  |
| C | -2.37294900 | 2.71441400  | 1.41097200  |
| C | 3.68479400  | -1.35979700 | 0.00030700  |
| C | 2.89163900  | -1.86079800 | 1.16912600  |
| C | 4.00009200  | 0.07468800  | 0.00010100  |
| C | 2.63941100  | -1.07837500 | 2.26226100  |
| C | 1.38591700  | -1.21816400 | 2.97812000  |
| C | 0.43761600  | -2.20756000 | 2.63019700  |
| C | -0.90437500 | -1.94167400 | 2.99375400  |
| C | -0.38562400 | 0.42136300  | 3.52207800  |
| C | 0.98286500  | 0.07461200  | 3.41763900  |
| C | -1.30838300 | -0.64787400 | 3.43234500  |
| C | 0.69606200  | -3.02680200 | 1.44590400  |
| C | 1.88473000  | -2.78773500 | 0.71306900  |

|   |             |             |             |
|---|-------------|-------------|-------------|
| C | -0.40674900 | -3.52635900 | 0.71266700  |
| C | -3.12290000 | -1.61402200 | 2.28631300  |
| C | -2.01353100 | -2.54158600 | 2.27702400  |
| C | -1.76978400 | -3.31726400 | 1.16202700  |
| C | -3.94502100 | -1.49420300 | 1.17290400  |
| C | -3.93094100 | 0.94943300  | 1.41154800  |
| C | -3.06948600 | 0.81614400  | 2.56409600  |
| C | -2.67561700 | -0.43420400 | 2.99250700  |
| C | -4.36092700 | -0.18039500 | 0.72427200  |
| C | -3.93086900 | 0.94901200  | -1.41200500 |
| C | -3.48405200 | 2.11792800  | -0.68963300 |
| C | -3.48408700 | 2.11813300  | 0.68885200  |
| C | -4.36089000 | -0.18061100 | -0.72441400 |
| C | -3.12278500 | -1.61470300 | -2.28596700 |
| C | -2.67546500 | -0.43509500 | -2.99248900 |
| C | -3.06935600 | 0.81538000  | -2.56446900 |
| C | -3.94496200 | -1.49455300 | -1.17263500 |
| C | -2.62414800 | -3.20138500 | 0.00042300  |
| C | -1.76972200 | -3.31760000 | -1.16110000 |
| C | -2.01341600 | -2.54226500 | -2.27634700 |
| C | -3.68721600 | -2.30844400 | 0.00026300  |
| N | 6.59215900  | -0.77206700 | 0.00047400  |
| H | 7.11119700  | -0.48378300 | -0.82803800 |
| H | 7.11099000  | -0.48486700 | 0.82949500  |
| H | 5.64347900  | -0.17315700 | 0.00071600  |
| B | 6.17659900  | -2.26106800 | -0.00051100 |
| H | 4.79089400  | -2.08361000 | 0.00046600  |
| H | 6.33861100  | -2.80785400 | -1.04872900 |
| H | 6.34008400  | -2.80975800 | 1.04648300  |

$C_{70}^{6-5}$

0 1

|   |             |             |             |
|---|-------------|-------------|-------------|
| C | -3.15190400 | -2.25757000 | 0.86726100  |
| C | -2.40476600 | -2.99463300 | -0.16329900 |
| C | -3.92248700 | -1.16466900 | 0.53917100  |
| C | -2.46300000 | -2.57758100 | -1.46227500 |
| C | -1.25145000 | -2.58480100 | -2.26041300 |
| C | -0.02579100 | -3.10266700 | -1.76916900 |
| C | 1.14557600  | -2.57832900 | -2.35436700 |
| C | -3.07321600 | -0.00116900 | 2.53082100  |
| C | -2.29285900 | -1.15355000 | 2.87375600  |
| C | -3.86538400 | -0.00060200 | 1.36709400  |
| C | -2.32013300 | -2.25030000 | 2.03541300  |
| C | -1.09435900 | -2.98053800 | 1.75300200  |
| C | 0.12922800  | -2.63299200 | 2.37448400  |
| C | 1.30378800  | -2.99770500 | 1.67499800  |
| C | 0.03010300  | -3.55086200 | -0.37521200 |
| C | -1.14731200 | -3.43750100 | 0.40793600  |
| C | 1.25513800  | -3.44783100 | 0.32227000  |
| C | -3.15171200 | 2.25679900  | 0.86929300  |
| C | -2.32000600 | 2.24838700  | 2.03746600  |
| C | -3.92239000 | 1.16424300  | 0.54022000  |
| C | -2.29278900 | 1.15091300  | 2.87480800  |



|   |             |             |             |
|---|-------------|-------------|-------------|
| C | -1.03156800 | 0.71056300  | 3.44152000  |
| C | 0.16236000  | 1.44532800  | 3.24695900  |
| C | 1.36732100  | 0.71184400  | 3.33781500  |
| C | 0.16229200  | -1.44846300 | 3.24555100  |
| C | -1.03159800 | -0.71380900 | 3.44087100  |
| C | 1.36727100  | -0.71511700 | 3.33708400  |
| C | -3.27325300 | 1.42404000  | -1.83183000 |
| C | -2.46293900 | 2.57898500  | -1.45982900 |
| C | -4.28933000 | 0.80333000  | -0.90197400 |
| C | -2.40454900 | 2.99482400  | -0.16047600 |
| C | -1.14709800 | 3.43718700  | 0.41121000  |
| C | 0.03031400  | 3.55130400  | -0.37177200 |
| C | 1.25532900  | 3.44747000  | 0.32568400  |
| C | 0.12936200  | 2.63066200  | 2.37702900  |
| C | -1.09417700 | 2.97884400  | 1.75581500  |
| C | 1.30395300  | 2.99598400  | 1.67789300  |
| C | -3.27333400 | -1.42218500 | -1.83326600 |
| C | -2.55069600 | -0.71818700 | -2.75736700 |
| C | -4.28953700 | -0.80217600 | -0.90279300 |
| C | -2.55072300 | 0.72099800  | -2.75646800 |
| C | -1.29269900 | 1.42304600  | -3.05753900 |
| C | -0.11513600 | 0.74167600  | -3.42737400 |
| C | 1.10014700  | 1.41503800  | -3.17640500 |
| C | -0.02559200 | 3.10448300  | -1.76621800 |
| C | -1.25127900 | 2.58709200  | -2.25786600 |
| C | 1.14572000  | 2.58057500  | -2.35186200 |
| C | -0.11516400 | -0.73827200 | -3.42814300 |
| C | -1.29272000 | -1.41996100 | -3.05903900 |
| C | 1.10008000  | -1.41195900 | -3.17777600 |
| C | 3.17057900  | 1.41463600  | -2.06009500 |
| C | 2.34631800  | 0.69089500  | -2.99988800 |
| C | 2.34631000  | -0.68810400 | -3.00056100 |
| C | 3.95798900  | 0.72530400  | -1.14466700 |
| C | 3.28397200  | 2.28823900  | 0.62358200  |
| C | 2.47013000  | 3.00325800  | -0.33517300 |
| C | 2.41472100  | 2.57483500  | -1.64470700 |
| C | 4.01673600  | 1.17447000  | 0.23188000  |
| C | 3.34435100  | -0.00119700 | 2.28040000  |
| C | 2.57870900  | 1.15995200  | 2.67618600  |
| C | 2.55130000  | 2.27766400  | 1.86864400  |
| C | 4.04592400  | -0.00064000 | 1.08237900  |
| C | 3.28378700  | -2.28897300 | 0.62135100  |
| C | 2.55114100  | -2.27959600 | 1.86642100  |
| C | 2.57861100  | -1.16267300 | 2.67506600  |
| C | 4.01664200  | -1.17488200 | 0.23073900  |
| C | 3.17053300  | -1.41281500 | -2.06146000 |
| C | 2.41457800  | -2.57333400 | -1.64725300 |
| C | 2.46997500  | -3.00306800 | -0.33810200 |
| C | 3.95794700  | -0.72439600 | -1.14536400 |
| H | -5.30189800 | -1.14341200 | -1.14679700 |
| H | -5.30181100 | 1.14485200  | -1.14560100 |

0 1

|   |             |             |             |
|---|-------------|-------------|-------------|
| C | -3.23072800 | -0.54983500 | 2.26145100  |
| C | -2.50934000 | -1.83403500 | 2.25678200  |
| C | -3.96204300 | -0.15108900 | 1.17055300  |
| C | -2.55329100 | -2.64204300 | 1.16218500  |
| C | -1.34660900 | -3.28088200 | 0.71068800  |
| C | -0.13420000 | -3.21999400 | 1.44562600  |
| C | 1.05605500  | -3.42969800 | 0.71150800  |
| C | -3.07686100 | 2.13431900  | 1.41731100  |
| C | -2.32780100 | 1.71024900  | 2.55934500  |
| C | -3.85756800 | 1.20647900  | 0.72327600  |
| C | -2.39371600 | 0.38728200  | 2.96206500  |
| C | -1.19342300 | -0.29186300 | 3.40293600  |
| C | 0.04534400  | 0.38529800  | 3.51594000  |
| C | 1.20649300  | -0.41842400 | 3.43255900  |
| C | -0.09261200 | -2.36678400 | 2.62883900  |
| C | -1.26306300 | -1.64621800 | 2.96797100  |
| C | 1.13872300  | -1.77281700 | 2.99357500  |
| C | -3.07686700 | 2.13573800  | -1.41507500 |
| C | -2.24813900 | 3.07294600  | -0.68765200 |
| C | -3.85751200 | 1.20719600  | -0.72189000 |
| C | -2.24810700 | 3.07214500  | 0.69075400  |
| C | -1.00071000 | 3.24013100  | 1.41183100  |
| C | 0.21810200  | 3.49527100  | 0.73665700  |
| C | 1.39792600  | 3.10750600  | 1.41212200  |
| C | 0.12081900  | 1.78387300  | 3.07059700  |
| C | -1.04791400 | 2.39656600  | 2.55935900  |
| C | 1.34970200  | 2.26449000  | 2.56073300  |
| C | -3.23095800 | -0.54753300 | -2.26213800 |
| C | -2.39386600 | 0.39028000  | -2.96163200 |
| C | -3.96186400 | -0.14987800 | -1.17052600 |
| C | -2.32790000 | 1.71288100  | -2.55761800 |
| C | -1.04799800 | 2.39915600  | -2.55693700 |
| C | 0.12074000  | 1.78702800  | -3.06882200 |
| C | 1.34965800  | 2.26713900  | -2.55851600 |
| C | 0.21809100  | 3.49602800  | -0.73317700 |
| C | -1.00073400 | 3.24153500  | -1.40854500 |
| C | 1.39792500  | 3.10896300  | -1.40904400 |
| C | -3.51566100 | -2.44555700 | -0.00114600 |
| C | -2.55342000 | -2.64092500 | -1.16478200 |
| C | -4.30211800 | -1.07336100 | -0.00053000 |
| C | -2.50939900 | -1.83167000 | -2.25844200 |
| C | -1.26314200 | -1.64315100 | -2.96951400 |
| C | -0.09267800 | -2.36406500 | -2.63118000 |
| C | 1.13862200  | -1.76973800 | -2.99535700 |
| C | 0.04523500  | 0.38888400  | -3.51555300 |
| C | -1.19354100 | -0.28839200 | -3.40321200 |
| C | 1.20638400  | -0.41491700 | -3.43301800 |
| C | -0.13425700 | -3.21854100 | -1.44887000 |
| C | -1.34663700 | -3.28010200 | -0.71398700 |
| C | 1.05602100  | -3.42897900 | -0.71497900 |
| C | 3.20396200  | -0.89718100 | -2.28704600 |
| C | 2.36210800  | -2.07220000 | -2.27737700 |
| C | 2.32317700  | -2.88672700 | -1.16355600 |
| C | 3.96942700  | -0.57616300 | -1.17285500 |

|   |             |             |             |
|---|-------------|-------------|-------------|
| C | 3.34614500  | 1.78640000  | -1.41108100 |
| C | 2.54510300  | 1.44260500  | -2.56272300 |
| C | 2.47552100  | 0.13384200  | -2.99184300 |
| C | 4.04502100  | 0.79968000  | -0.72342100 |
| C | 3.34617300  | 1.78494300  | 1.41281400  |
| C | 2.62271800  | 2.80626800  | 0.69083500  |
| C | 2.62271200  | 2.80699000  | -0.68805600 |
| C | 4.04506000  | 0.79893700  | 0.72415100  |
| C | 3.20403400  | -0.89952700 | 2.28606500  |
| C | 2.47559700  | 0.13078700  | 2.99191000  |
| C | 2.54518200  | 1.43998700  | 2.56412400  |
| C | 3.96946300  | -0.57737400 | 1.17219000  |
| C | 3.12090700  | -2.56035100 | -0.00133700 |
| C | 2.32322500  | -2.88790700 | 1.16059000  |
| C | 2.36218800  | -2.07454100 | 2.27525400  |
| C | 3.92641700  | -1.42904800 | -0.00077900 |
| H | -4.26053000 | -3.25058600 | -0.00140500 |
| H | -5.37129600 | -1.31129500 | -0.00085200 |

### C<sub>36</sub>

0 1

|   |             |             |             |
|---|-------------|-------------|-------------|
| C | 0.72037100  | 0.98577600  | 2.26365900  |
| C | 1.41217200  | -0.25911500 | 2.27902200  |
| C | 0.72039600  | -1.46830400 | 1.98526000  |
| C | 1.41250400  | -2.10393800 | 0.91537100  |
| C | 0.72065500  | -2.45500100 | -0.27873600 |
| C | 1.41286800  | -1.84524700 | -1.36377000 |
| C | 0.72037400  | -0.98577400 | -2.26365300 |
| C | 1.41217700  | 0.25911600  | -2.27902600 |
| C | 0.72039700  | 1.46830400  | -1.98525300 |
| C | 1.41250500  | 2.10394000  | -0.91537100 |
| C | 0.72065400  | 2.45500100  | 0.27874100  |
| C | 1.41286300  | 1.84524500  | 1.36376800  |
| C | -0.72041000 | 0.98574000  | 2.26358400  |
| C | -1.41293400 | 1.84541900  | 1.36377900  |
| C | -0.72068200 | 2.45490700  | 0.27872900  |
| C | -1.41257300 | 2.10406500  | -0.91553100 |
| C | -0.72042900 | 1.46827300  | -1.98520700 |
| C | -1.41224600 | 0.25904800  | -2.27920700 |
| C | -0.72040700 | -0.98573900 | -2.26357600 |
| C | -1.41293600 | -1.84542200 | -1.36378400 |
| C | -0.72068100 | -2.45490600 | -0.27872200 |
| C | -1.41257100 | -2.10406500 | 0.91552900  |
| C | -0.72042900 | -1.46827400 | 1.98521500  |
| C | -1.41224300 | -0.25904800 | 2.27920100  |
| C | -2.60680900 | -0.15826400 | 1.39552800  |
| C | -2.60676200 | 1.12947400  | 0.83461000  |
| C | -2.60688100 | 1.28814100  | -0.56097100 |
| C | -2.60680800 | 0.15826200  | -1.39553400 |
| C | -2.60676000 | -1.12947600 | -0.83461600 |
| C | -2.60688000 | -1.28814100 | 0.56096700  |
| C | 2.60690900  | -0.15831600 | 1.39550300  |

|   |            |             |             |
|---|------------|-------------|-------------|
| C | 2.60698100 | -1.28814500 | 0.56090300  |
| C | 2.60686300 | -1.12942700 | -0.83465100 |
| C | 2.60690900 | 0.15831800  | -1.39550600 |
| C | 2.60698000 | 1.28814600  | -0.56090400 |
| C | 2.60686300 | 1.12942700  | 0.83464900  |

$C_{36}^{AB}$

0 1

|   |             |             |             |
|---|-------------|-------------|-------------|
| C | 0.03357700  | -0.65720100 | -2.46456200 |
| C | 1.01866900  | -1.62177400 | -2.11689700 |
| C | 2.21326100  | -1.21643600 | -1.44925500 |
| C | 2.31676400  | -1.96746900 | -0.24319100 |
| C | 2.44325600  | -1.30104800 | 1.00816000  |
| C | 1.39167100  | -1.76006000 | 1.85865400  |
| C | 0.49516900  | -0.82816200 | 2.44817200  |
| C | -0.83711900 | -1.20373500 | 2.08735300  |
| C | -1.68419000 | -0.26895100 | 1.43220900  |
| C | -2.14872100 | -0.85971000 | 0.21340300  |
| C | -1.91264200 | -0.18376100 | -1.02522000 |
| C | -1.20899600 | -1.06629300 | -1.88951800 |
| C | 0.38364200  | 0.74064400  | -2.45031900 |
| C | -0.50585200 | 1.67078000  | -1.83451900 |
| C | -1.56601300 | 1.21575400  | -1.00848400 |
| C | -1.42509100 | 1.88078100  | 0.24180300  |
| C | -1.33624700 | 1.13081200  | 1.44750800  |
| C | -0.13450900 | 1.53363000  | 2.09141100  |
| C | 0.84617200  | 0.56915100  | 2.46477500  |
| C | 2.06541200  | 0.98255700  | 1.86422000  |
| C | 2.79637700  | 0.09415900  | 1.02432400  |
| C | 2.97871800  | 0.77416500  | -0.21165400 |
| C | 2.56559900  | 0.17967600  | -1.43456000 |
| C | 1.69441900  | 1.11932800  | -2.06029200 |
| C | 1.63695600  | 2.37358300  | -1.25007100 |
| C | 0.28254300  | 2.71090300  | -1.10990700 |
| C | -0.28170600 | 2.83714900  | 0.16847100  |
| C | 0.51036800  | 2.62612300  | 1.30686100  |
| C | 1.86519200  | 2.28848700  | 1.16663900  |
| C | 2.42699500  | 2.16161900  | -0.11121400 |
| C | 0.36781800  | -2.68565000 | -1.30908800 |
| C | 1.15932300  | -2.89688400 | -0.16659500 |
| C | 0.59490300  | -2.76935900 | 1.11458100  |
| C | -0.76322000 | -2.42890100 | 1.25481400  |
| C | -1.55651700 | -2.21803800 | 0.11175000  |
| C | -0.98950700 | -2.34522600 | -1.17021100 |
| N | -5.38415700 | -0.23900000 | 0.11461700  |
| H | -5.99484300 | -0.62220400 | -0.60563900 |
| H | -5.83357700 | -0.38352500 | 1.01778500  |
| H | -4.50888800 | -0.76957900 | 0.10999700  |
| B | -5.07301600 | 1.35918100  | -0.14691600 |
| H | -4.56386400 | 1.40366600  | -1.24542200 |
| H | -6.14740400 | 1.90996500  | -0.08838200 |
| H | -4.31610600 | 1.67493100  | 0.74661200  |

$C_{36}^{6-6}ts$ 

0 1

|   |             |             |             |
|---|-------------|-------------|-------------|
| C | -0.88987300 | -0.60100200 | -2.12866000 |
| C | 0.22794900  | -1.41967500 | -2.31754200 |
| C | 1.58256700  | -0.88633600 | -2.13271400 |
| C | 2.22459800  | -1.66852600 | -1.16190300 |
| C | 2.81344100  | -1.06140700 | 0.00040300  |
| C | 2.22422300  | -1.66850100 | 1.16255000  |
| C | 1.58185900  | -0.88626900 | 2.13310800  |
| C | 0.22719200  | -1.41962200 | 2.31755400  |
| C | -0.89056900 | -0.60094500 | 2.12821500  |
| C | -1.78490300 | -1.22259300 | 1.15856200  |
| C | -2.24831900 | -0.48153800 | -0.00043600 |
| C | -1.78448400 | -1.22261000 | -1.15920500 |
| C | -0.73170000 | 0.83237500  | -2.06331900 |
| C | -1.41394200 | 1.60690500  | -1.14799300 |
| C | -2.24144800 | 1.04622800  | -0.00046100 |
| C | -1.41431000 | 1.60693900  | 1.14731500  |
| C | -0.73236700 | 0.83243300  | 2.06287700  |
| C | 0.61043100  | 1.40369500  | 2.19578800  |
| C | 1.77358100  | 0.53135900  | 2.10763300  |
| C | 2.59477600  | 1.10801000  | 1.12730900  |
| C | 3.04467000  | 0.34556200  | 0.00041700  |
| C | 2.59513700  | 1.10797400  | -1.12663900 |
| C | 1.77427100  | 0.53129300  | -2.10722500 |
| C | 0.61115400  | 1.40362800  | -2.19579900 |
| C | 0.74740300  | 2.58365100  | -1.42935800 |
| C | -0.47245100 | 2.65726200  | -0.69262800 |
| C | -0.47268000 | 2.65729400  | 0.69223000  |
| C | 0.74692900  | 2.58370000  | 1.42936100  |
| C | 1.98184100  | 2.40903100  | 0.68143200  |
| C | 1.98207500  | 2.40901700  | -0.68101700 |
| C | 0.07069700  | -2.58010600 | -1.42359000 |
| C | 1.25402600  | -2.70659400 | -0.71205100 |
| C | 1.25379700  | -2.70656500 | 0.71243300  |
| C | 0.07023400  | -2.58006100 | 1.42360100  |
| C | -1.17257100 | -2.43402400 | 0.70942400  |
| C | -1.17234000 | -2.43406800 | -0.70983900 |
| N | -4.92354300 | -0.36572400 | -0.00008000 |
| H | -3.71175700 | -0.63625900 | -0.00047200 |
| H | -5.27419500 | -0.83302000 | -0.83565500 |
| H | -5.27353300 | -0.83341400 | 0.83555600  |
| B | -5.01520500 | 1.12725600  | 0.00033500  |
| H | -3.31595700 | 1.45358500  | -0.00064600 |
| H | -5.15517900 | 1.65898300  | -1.05191500 |
| H | -5.15389600 | 1.65844500  | 1.05302700  |

 $C_{36}^{5-5}ts$ 

0 1

|   |            |             |             |
|---|------------|-------------|-------------|
| C | 1.27067700 | -0.06671900 | -2.43775000 |
| C | 2.49157400 | 0.31438500  | -1.78902500 |

|   |             |             |             |
|---|-------------|-------------|-------------|
| C | 2.45706200  | 1.39014800  | -0.85406200 |
| C | 2.97469100  | 0.94153000  | 0.41024000  |
| C | 2.16934100  | 1.08493000  | 1.59123500  |
| C | 2.01979500  | -0.18616000 | 2.22278500  |
| C | 0.69295700  | -0.67839100 | 2.46058500  |
| C | 0.54355200  | -1.94203100 | 1.81492200  |
| C | -0.51711200 | -2.13744400 | 0.87263000  |
| C | 0.04407400  | -2.56301100 | -0.37324100 |
| C | -0.22712300 | -1.82829200 | -1.57278500 |
| C | 1.01384400  | -1.44309100 | -2.16839300 |
| C | 0.16442800  | 0.85154400  | -2.46751300 |
| C | -1.16434100 | 0.34019500  | -2.16291600 |
| C | -1.32411700 | -0.91005200 | -1.60842000 |
| C | -2.30279100 | -0.82971800 | -0.43603600 |
| C | -1.61985200 | -1.22537200 | 0.87358300  |
| C | -1.62265200 | -0.15041000 | 1.73759600  |
| C | -0.41499300 | 0.23680900  | 2.45392700  |
| C | -0.19466900 | 1.58961600  | 2.15095100  |
| C | 1.05309600  | 1.98894000  | 1.57338800  |
| C | 0.74318500  | 2.67835600  | 0.36242600  |
| C | 1.34026700  | 2.29370200  | -0.87526000 |
| C | 0.27036600  | 2.08244500  | -1.80301300 |
| C | -1.02960700 | 2.41017500  | -1.13280500 |
| C | -1.88583600 | 1.33142900  | -1.33552800 |
| C | -2.59738000 | 0.67250600  | -0.28348100 |
| C | -2.14990900 | 1.03245800  | 1.02578400  |
| C | -1.31252300 | 2.11021300  | 1.30066700  |
| C | -0.71284300 | 2.75037600  | 0.19893800  |
| C | 2.98606900  | -0.86537500 | -1.05805300 |
| C | 3.29008100  | -0.47503600 | 0.27183900  |
| C | 2.70139100  | -1.16661300 | 1.36255500  |
| C | 1.81373700  | -2.23355100 | 1.12310500  |
| C | 1.50501700  | -2.60543300 | -0.20468100 |
| C | 2.10059200  | -1.93247100 | -1.29446100 |
| N | -5.10291000 | -0.35654000 | 0.29463300  |
| H | -5.97263300 | 0.00301200  | -0.10334000 |
| H | -4.31152300 | 0.34623700  | 0.03392900  |
| H | -5.17123400 | -0.34158200 | 1.31453900  |
| B | -4.70011200 | -1.73357600 | -0.28493000 |
| H | -4.49113800 | -2.59247500 | 0.50386000  |
| H | -5.03855000 | -1.90587500 | -1.40975900 |
| H | -3.21429500 | -1.50917500 | -0.67542000 |

$C_{36}^{6-5}ts$

|     |            |             |             |
|-----|------------|-------------|-------------|
| 0 1 |            |             |             |
| C   | 1.68905400 | 1.38845000  | 1.80737700  |
| C   | 1.81062400 | 0.06118500  | 2.32104100  |
| C   | 0.66122300 | -0.78374300 | 2.40292500  |
| C   | 0.94249600 | -1.97880500 | 1.68634100  |
| C   | 0.07560000 | -2.40670800 | 0.63476200  |
| C   | 0.85895300 | -2.56561400 | -0.54071900 |
| C   | 0.50584800 | -1.86108600 | -1.72530500 |
| C   | 1.63951600 | -1.09444300 | -2.13208600 |

|   |             |             |             |
|---|-------------|-------------|-------------|
| C | 1.52571000  | 0.31082800  | -2.32370700 |
| C | 2.50927200  | 0.94512900  | -1.50497000 |
| C | 2.11708100  | 1.93099600  | -0.54779900 |
| C | 2.61468900  | 1.54293500  | 0.73187500  |
| C | 0.38080900  | 1.98178500  | 1.70698800  |
| C | 0.01585900  | 2.66663300  | 0.52351800  |
| C | 0.80426400  | 2.51546000  | -0.64931400 |
| C | -0.07025500 | 2.06514400  | -1.68503700 |
| C | 0.21769100  | 0.89652300  | -2.43162700 |
| C | -0.93399500 | 0.06156400  | -2.29492100 |
| C | -0.80836100 | -1.27860700 | -1.82628700 |
| C | -1.71327600 | -1.41746900 | -0.74360800 |
| C | -1.24020500 | -1.82595100 | 0.52553300  |
| C | -1.62205300 | -0.80549200 | 1.44679400  |
| C | -0.64858600 | -0.19838300 | 2.29565400  |
| C | -0.75955000 | 1.19704700  | 2.08166700  |
| C | -1.87496700 | 1.45334000  | 1.14287300  |
| C | -1.42414200 | 2.37079200  | 0.19846900  |
| C | -1.45811400 | 1.97178200  | -1.15582900 |
| C | -2.01121200 | 0.76428700  | -1.57442700 |
| C | -2.55112900 | -0.15532900 | -0.60047600 |
| C | -2.48341100 | 0.21296200  | 0.80091100  |
| C | 2.85364100  | -0.64372500 | 1.54200200  |
| C | 2.32287000  | -1.88676500 | 1.15138000  |
| C | 2.27569800  | -2.24491400 | -0.20873500 |
| C | 2.74948000  | -1.34928400 | -1.17997400 |
| C | 3.28203300  | -0.10066100 | -0.80096900 |
| C | 3.32208200  | 0.25414100  | 0.56103800  |
| H | -5.77240800 | -0.94472700 | 1.43302900  |
| H | -5.88412900 | 0.50032100  | 0.64047300  |
| N | -5.32368900 | -0.34603400 | 0.74062900  |
| B | -5.08453300 | -1.09049800 | -0.65000000 |
| H | -5.88279300 | -0.74069300 | -1.47137200 |
| H | -4.89548700 | -2.25834000 | -0.45905200 |
| H | -4.38553600 | -0.06155200 | 1.12374300  |
| H | -3.94259500 | -0.58430300 | -1.01337300 |

$C_{36}^{5-5}$

01

|   |             |             |             |
|---|-------------|-------------|-------------|
| C | 0.75717900  | 0.06971900  | 2.50587800  |
| C | 1.67395600  | -0.93510000 | 2.04161000  |
| C | 1.16335100  | -1.99993600 | 1.23562600  |
| C | 1.89285300  | -2.04786500 | -0.01533400 |
| C | 1.16443500  | -1.97995200 | -1.26556000 |
| C | 1.67639500  | -0.90308000 | -2.05518200 |
| C | 0.75962700  | 0.10920400  | -2.50379400 |
| C | 1.20003100  | 1.37056800  | -2.01279600 |
| C | 0.31684300  | 2.18475900  | -1.22020800 |
| C | 0.96494200  | 2.49117100  | 0.01987100  |
| C | 0.31578600  | 2.16498500  | 1.25504200  |
| C | 1.19796500  | 1.33867000  | 2.03453200  |
| C | -0.65067500 | -0.20265300 | 2.51333900  |
| C | -1.55774900 | 0.81620100  | 1.96945400  |

|   |             |             |             |
|---|-------------|-------------|-------------|
| C | -1.08260900 | 1.89803000  | 1.25018100  |
| C | -1.95599700 | 2.18900100  | 0.01675900  |
| C | -1.08140200 | 1.91770700  | -1.22059600 |
| C | -1.55613600 | 0.84746700  | -1.95725500 |
| C | -0.64848600 | -0.16303900 | -2.51646500 |
| C | -1.11587400 | -1.38164400 | -2.03035400 |
| C | -0.23636800 | -2.22934400 | -1.26614500 |
| C | -0.89573300 | -2.47915300 | -0.01991600 |
| C | -0.23746300 | -2.24925900 | 1.23110300  |
| C | -1.11746900 | -1.41366900 | 2.00738600  |
| C | -2.38073700 | -1.18023900 | 1.24024900  |
| C | -2.60531800 | 0.18161300  | 1.21955900  |
| C | -3.01056700 | 1.00848300  | 0.00689700  |
| C | -2.60445100 | 0.20114200  | -1.21859600 |
| C | -2.37967800 | -1.16035700 | -1.26047900 |
| C | -2.18558900 | -1.81549300 | -0.01527200 |
| C | 2.69612400  | -0.26027100 | 1.24014600  |
| C | 2.81633300  | -0.95087800 | -0.00645700 |
| C | 2.69739200  | -0.24109100 | -1.24239800 |
| C | 2.41871500  | 1.13529200  | -1.22803200 |
| C | 2.24754800  | 1.79833100  | 0.01465900  |
| C | 2.41762100  | 1.11574800  | 1.24696000  |
| H | -2.39422800 | 3.19216100  | 0.02424400  |
| H | -4.05456400 | 1.33740900  | 0.00928800  |

$C_{36}^{6-6}$

0 1

|   |             |             |             |
|---|-------------|-------------|-------------|
| C | 0.41633000  | -2.62152000 | -0.00107500 |
| C | 1.14659900  | -2.18912700 | -1.16760300 |
| C | 0.54278000  | -1.39254200 | -2.14946000 |
| C | 1.39937800  | -0.20899100 | -2.36122700 |
| C | 0.86835700  | 1.06399900  | -2.13845600 |
| C | 1.68998800  | 1.79143100  | -1.17063600 |
| C | 1.13690100  | 2.61768300  | 0.00184600  |
| C | 1.68823600  | 1.78933200  | 1.17356300  |
| C | 0.86504100  | 1.06149300  | 2.14085300  |
| C | 1.39564600  | -0.21149700 | 2.36201600  |
| C | 0.53974600  | -1.39550600 | 2.14856200  |
| C | 1.14488500  | -2.19080000 | 1.16704800  |
| C | -0.99797400 | -2.53114600 | -0.00195800 |
| C | -1.62762000 | -1.89913300 | 1.12547500  |
| C | -0.87958900 | -1.24660900 | 2.11571200  |
| C | -1.45114200 | 0.09779100  | 2.20033600  |
| C | -0.55765400 | 1.25833300  | 2.05764300  |
| C | -1.13047000 | 2.10007000  | 1.13006300  |
| C | -0.42163800 | 2.84979100  | 0.00114400  |
| C | -1.12888500 | 2.10055000  | -1.12874700 |
| C | -0.55465700 | 1.26012500  | -2.05687300 |
| C | -1.44773300 | 0.09989700  | -2.20081200 |
| C | -0.87646800 | -1.24461800 | -2.11837000 |
| C | -1.62552300 | -1.89795200 | -1.12910500 |
| C | -2.73173000 | -0.98926900 | -0.68360400 |
| C | -2.73337500 | -0.99076300 | 0.67998300  |



|   |             |             |             |
|---|-------------|-------------|-------------|
| C | -2.62095400 | 0.25084600  | 1.44092700  |
| C | -2.38035700 | 1.45062200  | 0.69089200  |
| C | -2.38036700 | 1.45154400  | -0.69241000 |
| C | -2.61964600 | 0.25251800  | -1.44370800 |
| C | 2.36258500  | -1.47302500 | -0.72528300 |
| C | 2.55004100  | -0.32895300 | -1.46294000 |
| C | 2.67226400  | 0.93267500  | -0.72823000 |
| C | 2.67188000  | 0.93189600  | 0.73208300  |
| C | 2.54812500  | -0.33057100 | 1.46499400  |
| C | 2.36209000  | -1.47406500 | 0.72661300  |
| H | -0.62476000 | 3.92522200  | 0.00119700  |
| H | 1.61422500  | 3.60774600  | 0.00326400  |

$C_{36}^{6-5}$

0 1

|   |             |             |             |
|---|-------------|-------------|-------------|
| C | 0.93270800  | -2.09281500 | -1.24545300 |
| C | 1.72716100  | -1.08769900 | -1.88350300 |
| C | 1.09094400  | 0.09888500  | -2.37053700 |
| C | 1.72728700  | 1.24096300  | -1.78650700 |
| C | 0.93275500  | 2.18943800  | -1.06709100 |
| C | 1.45224800  | 2.30501700  | 0.25494900  |
| C | 0.59864300  | 2.07927500  | 1.38034300  |
| C | 1.18499000  | 1.06474100  | 2.18434100  |
| C | 0.43624200  | -0.10422700 | 2.49996600  |
| C | 1.18513400  | -1.24309100 | 2.08808100  |
| C | 0.59879300  | -2.18747900 | 1.20280000  |
| C | 1.45232700  | -2.31842200 | 0.06219300  |
| C | -0.49090300 | -2.09998500 | -1.44077300 |
| C | -1.34890700 | -2.24758900 | -0.29661800 |
| C | -0.82775300 | -2.16991700 | 1.01901300  |
| C | -1.62099600 | -1.20431200 | 1.69793700  |
| C | -0.99600500 | -0.09645200 | 2.31335900  |
| C | -1.62097900 | 1.05881000  | 1.79222200  |
| C | -0.82776400 | 2.07751000  | 1.19604000  |
| C | -1.34887500 | 2.26473300  | -0.10864100 |
| C | -0.49101500 | 2.21311500  | -1.26124000 |
| C | -1.08092600 | 1.23800900  | -2.08811500 |
| C | -0.33592100 | 0.10560900  | -2.53275500 |
| C | -1.08089200 | -1.05992400 | -2.18390600 |
| C | -2.36749400 | -0.65892800 | -1.52771500 |
| C | -2.54666500 | -1.40765600 | -0.40819400 |
| C | -2.90721100 | -0.83226700 | 0.94362400  |
| C | -2.90714400 | 0.75078900  | 1.00963400  |
| C | -2.54646200 | 1.43657900  | -0.28960600 |
| C | -2.36738600 | 0.78370100  | -1.46755000 |
| C | 2.76843200  | -0.66570900 | -0.93517000 |
| C | 2.76852600  | 0.74147900  | -0.87642000 |
| C | 2.61371400  | 1.39679300  | 0.36994800  |
| C | 2.45080900  | 0.64372900  | 1.54091800  |
| C | 2.45074300  | -0.76993500 | 1.48175100  |
| C | 2.61373800  | -1.42277200 | 0.25215500  |
| H | -3.81574600 | -1.24299300 | 1.39231200  |
| H | -3.81563700 | 1.12301500  | 1.49081900  |

**Li@C<sub>60</sub>**

1 1

|   |             |             |             |
|---|-------------|-------------|-------------|
| C | -0.43072900 | 3.07975400  | 1.69458300  |
| C | -1.77037200 | 2.83707600  | 1.18920300  |
| C | -2.53010400 | 1.80263300  | 1.71541000  |
| C | -1.98805800 | 0.96694000  | 2.77240300  |
| C | -0.71166600 | 1.20273700  | 3.26007900  |
| C | 0.08523900  | 2.28312100  | 2.70691000  |
| C | 0.40772300  | 3.46717800  | 0.57380100  |
| C | -0.41315300 | 3.46180200  | -0.62423400 |
| C | -1.75935400 | 3.07289000  | -0.24303500 |
| C | -2.50828100 | 2.26345900  | -1.08457500 |
| C | -3.31661000 | 0.95765000  | 0.83493400  |
| C | -2.44038300 | -0.39405200 | 2.54483200  |
| C | -1.59573000 | -1.46093400 | 2.81299800  |
| C | -0.25621500 | -1.21435200 | 3.31643400  |
| C | 0.17453000  | 0.08618800  | 3.53695400  |
| C | 1.51925900  | 0.47537700  | 3.15278600  |
| C | 1.46420900  | 1.83428100  | 2.63947900  |
| C | 2.27101600  | 2.21259900  | 1.57283600  |
| C | 1.72995200  | 3.04737300  | 0.51424800  |
| C | 0.12011900  | 3.02953100  | -1.83064400 |
| C | 1.49914600  | 2.57997100  | -1.89134600 |
| C | 2.28859000  | 2.59425100  | -0.74803600 |
| C | 3.18309500  | 1.47810900  | -0.47171600 |
| C | 3.17222800  | 1.24141700  | 0.96720300  |
| C | 3.22558600  | -0.06460600 | 1.46086000  |
| C | 2.37963200  | -0.45442000 | 2.58121000  |
| C | 1.92862600  | -1.81629200 | 2.35200300  |
| C | 0.63755400  | -2.18418700 | 2.70840700  |
| C | -3.26111000 | -0.39929800 | 1.34735300  |
| C | -0.43576800 | -3.47326200 | -0.57505000 |
| C | -1.75122600 | -3.03960400 | -0.51327200 |
| C | -2.29357500 | -2.20411100 | -1.57028700 |
| C | -1.49521700 | -1.83569800 | -2.64291400 |
| C | -0.11516100 | -2.28309800 | -2.70444900 |
| C | 1.73959700  | -2.83572000 | -1.19050600 |
| C | 1.72870600  | -3.07170000 | 0.24394100  |
| C | 0.38388000  | -3.46643600 | 0.62365200  |
| C | -0.14947400 | -3.02891000 | 1.82811300  |
| C | -1.52932900 | -2.58215200 | 1.89353200  |
| C | -2.31059300 | -2.58559000 | 0.74772800  |
| C | -3.18710400 | -1.23472900 | -0.96301000 |
| C | -3.23996600 | 0.06170300  | -1.45312400 |
| C | -2.40096300 | 0.44816700  | -2.57310200 |
| C | -1.54998600 | -0.47904300 | -3.15534200 |
| C | -0.20423900 | -0.08695800 | -3.53359000 |
| C | 0.68316800  | -1.20240500 | -3.25557800 |
| C | 1.96768000  | -0.97114600 | -2.78109200 |
| C | 2.50817900  | -1.80805500 | -1.72407300 |
| C | 2.48665100  | -2.27127000 | 1.09036000  |
| C | 3.29189200  | -1.19138700 | 0.53690600  |
| C | 3.30212400  | -0.96431300 | -0.84134800 |

|    |             |             |             |
|----|-------------|-------------|-------------|
| C  | 3.24685700  | 0.39922500  | -1.35648000 |
| C  | 2.41925700  | 0.39084700  | -2.55516500 |
| C  | 1.56533400  | 1.45668300  | -2.81193300 |
| C  | 0.22671600  | 1.21442300  | -3.31921400 |
| C  | -0.66570000 | 2.18606600  | -2.71293500 |
| C  | -1.94914300 | 1.80984000  | -2.34587800 |
| C  | -3.19790100 | -1.47062900 | 0.46886200  |
| C  | -3.30625200 | 1.18314000  | -0.53376800 |
| C  | 0.40123900  | -3.08434900 | -1.69601600 |
| Li | 1.45116200  | 0.06854900  | 0.02738100  |

$Li@C_{60}^{AB}$

1 1

|   |             |             |             |
|---|-------------|-------------|-------------|
| C | 0.78738200  | 2.45205200  | -2.28923600 |
| C | -0.64465800 | 2.69193100  | -2.29145500 |
| C | -1.25808700 | 3.22373800  | -1.16659300 |
| C | -0.46896900 | 3.54258100  | 0.01033900  |
| C | 0.89955300  | 3.31855600  | 0.01125400  |
| C | 1.54163200  | 2.75847700  | -1.16484500 |
| C | 1.03757200  | 1.22238900  | -3.01779700 |
| C | -0.24077600 | 0.70106500  | -3.46970900 |
| C | -1.28029100 | 1.61012200  | -3.02031000 |
| C | -2.50060200 | 1.10826000  | -2.59190300 |
| C | -2.53689500 | 2.70156300  | -0.72037300 |
| C | -1.26079100 | 3.21683000  | 1.18353700  |
| C | -0.64995800 | 2.67833600  | 2.30667500  |
| C | 0.78208700  | 2.43853000  | 2.30630500  |
| C | 1.53897000  | 2.75155000  | 1.18545400  |
| C | 2.57838900  | 1.84324400  | 0.73609900  |
| C | 2.58002900  | 1.84756400  | -0.71841000 |
| C | 2.82541500  | 0.67390500  | -1.41907000 |
| C | 2.03578300  | 0.35350500  | -2.59501100 |
| C | -0.46989000 | -0.66728900 | -3.47662300 |
| C | 0.56983100  | -1.57618000 | -3.02613900 |
| C | 1.79591300  | -1.07962100 | -2.60121600 |
| C | 2.44226500  | -1.65053900 | -1.42645500 |
| C | 3.07991500  | -0.56392900 | -0.69483300 |
| C | 3.07838500  | -0.56808900 | 0.69939200  |
| C | 2.82218600  | 0.66545200  | 1.43038300  |
| C | 2.02981100  | 0.33815800  | 2.60257300  |
| C | 1.03061200  | 1.20455000  | 3.02811200  |
| C | -2.53854300 | 2.69727700  | 0.73128500  |
| C | -1.75526500 | -1.20996700 | 3.02072100  |
| C | -2.74497300 | -0.33927000 | 2.58899500  |
| C | -3.53392700 | -0.65905000 | 1.41294800  |
| C | -3.29748700 | -1.83521100 | 0.71699400  |
| C | -2.25788400 | -2.74429300 | 1.16452600  |
| C | -0.07358300 | -2.67798600 | 2.28922900  |
| C | 0.56289400  | -1.59405900 | 3.01886900  |
| C | -0.47788200 | -0.68780900 | 3.47229600  |
| C | -0.24876900 | 0.68056500  | 3.47406500  |
| C | -1.28725500 | 1.59222700  | 3.02760300  |
| C | -2.50656400 | 1.09290400  | 2.59333900  |

|    |             |             |             |
|----|-------------|-------------|-------------|
| C  | -3.78338800 | 0.57621600  | 0.69119300  |
| C  | -3.78178400 | 0.58034000  | -0.69572400 |
| C  | -3.53061600 | -0.65061800 | -1.42419400 |
| C  | -3.29576800 | -1.83085500 | -0.73464400 |
| C  | -2.25519000 | -2.73735100 | -1.18507600 |
| C  | -1.61451700 | -3.30275700 | -0.01121600 |
| C  | -0.24616800 | -3.54051200 | -0.01033700 |
| C  | 0.54193700  | -3.22172300 | 1.16802700  |
| C  | 1.78994900  | -1.09501900 | 2.59978900  |
| C  | 2.43906500  | -1.65901000 | 1.42314100  |
| C  | 1.82845600  | -2.70234400 | 0.72346000  |
| C  | 1.83007900  | -2.69800700 | -0.73439500 |
| C  | 0.54461300  | -3.21479500 | -1.18497100 |
| C  | -0.06830800 | -2.66443600 | -2.30443100 |
| C  | -1.50012000 | -2.42568100 | -2.30729600 |
| C  | -1.74831200 | -1.19213000 | -3.03107600 |
| C  | -2.73899000 | -0.32395600 | -2.59651600 |
| C  | -3.14761800 | 1.65861800  | 1.42047700  |
| C  | -3.14440300 | 1.66705900  | -1.41716000 |
| C  | -1.50541400 | -2.43922000 | 2.29025300  |
| N  | 7.69417100  | 0.12615500  | -0.00065400 |
| H  | 8.20688800  | -0.75575700 | -0.00461300 |
| H  | 7.98521600  | 0.65543000  | -0.82266500 |
| H  | 7.98797000  | 0.64967900  | 0.82405900  |
| B  | 6.07459000  | -0.13657400 | 0.00093400  |
| H  | 5.84691400  | -0.77118800 | 1.00839200  |
| H  | 5.56308900  | 0.96474500  | 0.00486700  |
| H  | 5.84429400  | -0.76510700 | -1.00984700 |
| Li | 0.91300700  | -0.73105400 | -0.00073700 |

$Li@C_{60}^{6-6}ts1$

1 1

|   |             |            |             |
|---|-------------|------------|-------------|
| C | -0.20969300 | 3.54333200 | 0.07168300  |
| C | 0.96102200  | 3.18255600 | 0.85570600  |
| C | 2.06095800  | 2.59544300 | 0.24102000  |
| C | 2.04542000  | 2.34373200 | -1.18952000 |
| C | 0.92583200  | 2.68888500 | -1.93709100 |
| C | -0.22647700 | 3.29920900 | -1.29184900 |
| C | -1.38629600 | 3.26655900 | 0.87490200  |
| C | -0.94249000 | 2.73952400 | 2.15285900  |
| C | 0.50767700  | 2.68875300 | 2.13727700  |
| C | 1.17467200  | 1.63356100 | 2.75012100  |
| C | 2.77378600  | 1.51423400 | 0.88650800  |
| C | 2.74644400  | 1.10583800 | -1.44271900 |
| C | 2.26607500  | 0.23563300 | -2.40211400 |
| C | 1.09747400  | 0.58488900 | -3.18411100 |
| C | 0.44256200  | 1.78901800 | -2.95903500 |
| C | -1.00808700 | 1.83684200 | -2.95306400 |
| C | -1.42213300 | 2.76981000 | -1.92093500 |
| C | -2.54706000 | 2.50073500 | -1.15388400 |
| C | -2.52828100 | 2.75368000 | 0.27552000  |
| C | -1.66041000 | 1.72650700 | 2.77351300  |
| C | -2.85887000 | 1.19763800 | 2.15209700  |

|    |             |             |             |
|----|-------------|-------------|-------------|
| C  | -3.27992400 | 1.69760900  | 0.92787100  |
| C  | -3.76694700 | 0.79409300  | -0.09917200 |
| C  | -3.31075800 | 1.28883400  | -1.38536800 |
| C  | -2.91465300 | 0.39738800  | -2.37229000 |
| C  | -1.73618600 | 0.67618600  | -3.16961200 |
| C  | -1.05024300 | -0.58249700 | -3.41014800 |
| C  | 0.33550000  | -0.62606500 | -3.41945000 |
| C  | 3.36341900  | 0.61345900  | -0.16157900 |
| C  | 0.74149000  | -3.25649800 | -0.88739900 |
| C  | 1.88693700  | -2.74227000 | -0.28337300 |
| C  | 1.90974400  | -2.49384600 | 1.14202300  |
| C  | 0.77942500  | -2.76098600 | 1.91257700  |
| C  | -0.41675300 | -3.29783200 | 1.28448500  |
| C  | -1.60443900 | -3.18884300 | -0.86805200 |
| C  | -1.14571100 | -2.69358800 | -2.15378400 |
| C  | 0.30535400  | -2.74556300 | -2.16547000 |
| C  | 1.03471600  | -1.73023500 | -2.78075500 |
| C  | 2.23536700  | -1.21120500 | -2.17032300 |
| C  | 2.64239800  | -1.68748700 | -0.93046800 |
| C  | 2.69573900  | -1.28749300 | 1.37659900  |
| C  | 2.31003100  | -0.40873800 | 2.39486400  |
| C  | 1.11447400  | -0.68031700 | 3.16971900  |
| C  | 0.37109100  | -1.83973200 | 2.95163500  |
| C  | -1.07997400 | -1.78883800 | 2.95842800  |
| C  | -1.56690500 | -2.69433100 | 1.93278200  |
| C  | -2.68118700 | -2.35231000 | 1.18050100  |
| C  | -2.70116700 | -2.60561700 | -0.25018700 |
| C  | -1.80924200 | -1.63950200 | -2.76447600 |
| C  | -2.95739100 | -1.03180400 | -2.11908300 |
| C  | -3.39624400 | -1.50489500 | -0.89073800 |
| C  | -3.80619600 | -0.57103600 | 0.14241500  |
| C  | -3.36527300 | -1.09543100 | 1.42268800  |
| C  | -2.90171700 | -0.23206200 | 2.40489600  |
| C  | -1.73438100 | -0.58682600 | 3.18971600  |
| C  | -0.96316700 | 0.62339200  | 3.41302500  |
| C  | 0.42447600  | 0.57997300  | 3.40530900  |
| C  | 3.19661900  | -0.80866500 | 0.09556300  |
| C  | 2.33213700  | 1.03159100  | 2.10956900  |
| C  | -0.43460300 | -3.53787100 | -0.08188200 |
| N  | 6.19876500  | -0.67276400 | -0.08678800 |
| H  | 6.88777400  | -1.02971600 | 0.57887300  |
| H  | 6.50955200  | -0.93026600 | -1.02561700 |
| H  | 5.30658700  | -1.17144900 | 0.09872500  |
| B  | 5.98472100  | 0.89250900  | 0.08192700  |
| H  | 4.69224900  | 0.99128600  | -0.26326500 |
| H  | 5.98777900  | 1.20350300  | 1.23454300  |
| H  | 6.55409000  | 1.52376500  | -0.75324700 |
| Li | 1.04637000  | -0.14647600 | 0.53340500  |

$Li@C_{60}^{6-}ts_2$

11

|   |             |             |             |
|---|-------------|-------------|-------------|
| C | -1.99838400 | -2.81866200 | -1.30219900 |
| C | -0.70046600 | -2.91680200 | -1.95425600 |

|   |             |             |             |
|---|-------------|-------------|-------------|
| C | 0.43666100  | -3.22267300 | -1.20909200 |
| C | 0.31963400  | -3.45131800 | 0.22184300  |
| C | -0.92623900 | -3.36751500 | 0.84029400  |
| C | -2.10956500 | -3.04021600 | 0.05972800  |
| C | -2.72510400 | -1.72746700 | -1.92326500 |
| C | -1.87660100 | -1.15754700 | -2.95464200 |
| C | -0.63139400 | -1.89937500 | -2.97070600 |
| C | 0.57138000  | -1.23245600 | -3.18384800 |
| C | 1.69705300  | -2.57156000 | -1.46296400 |
| C | 1.50893600  | -2.94621400 | 0.86328600  |
| C | 1.38717100  | -2.30462300 | 2.08034000  |
| C | 0.09530000  | -2.18775000 | 2.72404500  |
| C | -1.04140800 | -2.72115600 | 2.12240700  |
| C | -2.28970000 | -1.98319900 | 2.14804500  |
| C | -2.95112400 | -2.18098500 | 0.87118300  |
| C | -3.64109700 | -1.13121100 | 0.28053800  |
| C | -3.52531500 | -0.89934900 | -1.14839200 |
| C | -1.86552500 | 0.21616100  | -3.15856700 |
| C | -2.70628000 | 1.07896200  | -2.35557200 |
| C | -3.51765100 | 0.53417700  | -1.37013600 |
| C | -3.63360200 | 1.18960600  | -0.08045400 |
| C | -3.70539000 | 0.15901100  | 0.93971800  |
| C | -3.07426900 | 0.34652600  | 2.16212000  |
| C | -2.34764600 | -0.74534200 | 2.77472600  |
| C | -1.16192700 | -0.19289900 | 3.40936400  |
| C | 0.03111700  | -0.89979500 | 3.38604700  |
| C | 2.58316200  | -2.59732100 | -0.19471000 |
| C | 2.11190200  | 1.74638200  | 1.92749200  |
| C | 2.91056800  | 0.91275800  | 1.14315700  |
| C | 3.03720100  | 1.14646300  | -0.28364200 |
| C | 2.33960000  | 2.20811200  | -0.88813800 |
| C | 1.50003700  | 3.06828200  | -0.06725100 |
| C | 0.09841700  | 2.94634200  | 1.95187100  |
| C | 0.03102900  | 1.91270000  | 2.97103500  |
| C | 1.28547500  | 1.18313400  | 2.96010600  |
| C | 1.29099200  | -0.20489500 | 3.15370100  |
| C | 2.14582300  | -1.06340900 | 2.37855700  |
| C | 2.92632700  | -0.52161500 | 1.35650700  |
| C | 3.07164600  | -0.15247500 | -0.92041900 |
| C | 2.49521400  | -0.32367400 | -2.17402000 |
| C | 1.76764300  | 0.75295400  | -2.76697400 |
| C | 1.70198200  | 2.01365400  | -2.15226500 |
| C | 0.44421500  | 2.74461900  | -2.13508400 |
| C | 0.32338900  | 3.40430500  | -0.84719600 |
| C | -0.91406800 | 3.49268100  | -0.22463600 |
| C | -1.02917900 | 3.25864200  | 1.20473400  |
| C | -1.16507200 | 1.24580500  | 3.19858300  |
| C | -2.34124900 | 1.57555600  | 2.42054500  |
| C | -2.27796300 | 2.56190700  | 1.44598400  |
| C | -2.93548100 | 2.36248100  | 0.16705700  |
| C | -2.09106900 | 2.93804200  | -0.86438200 |
| C | -1.97412300 | 2.30839900  | -2.09588700 |
| C | -0.68148500 | 2.20941400  | -2.74134200 |
| C | -0.60965100 | 0.90789300  | -3.39220300 |
| C | 0.57980800  | 0.19948500  | -3.40730300 |

|    |            |             |             |
|----|------------|-------------|-------------|
| C  | 3.20736100 | -1.20333500 | 0.08568000  |
| C  | 1.74216400 | -1.57600900 | -2.41218700 |
| C  | 1.38837900 | 2.84393500  | 1.29756800  |
| N  | 5.84655500 | -0.34032900 | 0.17786300  |
| H  | 6.19163900 | -0.42378300 | 1.13647100  |
| H  | 6.44006600 | -0.90096600 | -0.43887800 |
| H  | 4.82023500 | -0.88861900 | 0.15669100  |
| B  | 5.69055700 | 1.08930600  | -0.30213700 |
| H  | 5.68695000 | 1.93557900  | 0.52262800  |
| H  | 5.73123000 | 1.25725200  | -1.47174300 |
| Li | 0.97502200 | -0.67249200 | 0.39731600  |
| H  | 3.33676900 | -3.39146500 | -0.25865000 |

*Li@C<sub>60</sub><sup>-6</sup>1*

1 1

|   |             |             |             |
|---|-------------|-------------|-------------|
| C | -2.43872700 | 2.50847500  | 1.28214900  |
| C | -1.17302600 | 2.84858100  | 1.91693300  |
| C | -0.11517900 | 3.32633100  | 1.14922100  |
| C | -0.28442700 | 3.49224100  | -0.28509300 |
| C | -1.50558300 | 3.19223900  | -0.88638700 |
| C | -2.60342700 | 2.68039000  | -0.08099400 |
| C | -2.95421000 | 1.31844200  | 1.93412700  |
| C | -2.00561500 | 0.93078200  | 2.96282300  |
| C | -0.91468000 | 1.88022200  | 2.95164800  |
| C | 0.38986900  | 1.43703600  | 3.15803900  |
| C | 1.23755200  | 2.90313900  | 1.40000200  |
| C | 0.95858300  | 3.17380000  | -0.93118300 |
| C | 0.94870400  | 2.51634100  | -2.14672600 |
| C | -0.31331400 | 2.17002600  | -2.76514000 |
| C | -1.52000500 | 2.51062700  | -2.15378500 |
| C | -2.61937000 | 1.56505800  | -2.14570700 |
| C | -3.28980500 | 1.66877200  | -0.86468600 |
| C | -3.77805800 | 0.52580900  | -0.24464200 |
| C | -3.60525700 | 0.34779900  | 1.18650400  |
| C | -1.74659600 | -0.41759200 | 3.18552200  |
| C | -2.43530900 | -1.43186700 | 2.41120100  |
| C | -3.34539800 | -1.05863300 | 1.43289000  |
| C | -3.36348900 | -1.75182500 | 0.15724200  |
| C | -3.62387400 | -0.76801100 | -0.87990400 |
| C | -2.98686400 | -0.86682000 | -2.10919400 |
| C | -2.46930900 | 0.32147100  | -2.75010700 |
| C | -1.21306500 | -0.02939400 | -3.39281400 |
| C | -0.16125300 | 0.87880100  | -3.41201400 |
| C | 2.07425100  | 3.01787900  | 0.11579700  |
| C | 2.37352800  | -1.33380600 | -1.92024400 |
| C | 3.03466300  | -0.37317800 | -1.17360000 |
| C | 3.41104200  | -0.57088800 | 0.26200300  |
| C | 2.67818100  | -1.69275300 | 0.88931800  |
| C | 2.00962200  | -2.71303700 | 0.10190400  |
| C | 0.59531500  | -2.87373700 | -1.89533000 |
| C | 0.33664700  | -1.88181600 | -2.92622200 |
| C | 1.44139800  | -0.94401600 | -2.95178600 |

|    |             |             |             |
|----|-------------|-------------|-------------|
| C  | 1.21426900  | 0.42463900  | -3.20120700 |
| C  | 1.91639200  | 1.43236200  | -2.45398400 |
| C  | 2.76704100  | 1.02674300  | -1.40862800 |
| C  | 3.03670900  | 0.76113800  | 0.86134500  |
| C  | 2.44540700  | 0.85848600  | 2.14873500  |
| C  | 1.92435900  | -0.29836600 | 2.74110000  |
| C  | 2.06159800  | -1.58666300 | 2.12841000  |
| C  | 0.94127200  | -2.53582000 | 2.16593700  |
| C  | 0.91968400  | -3.24201900 | 0.90200000  |
| C  | -0.29052800 | -3.55442400 | 0.30053000  |
| C  | -0.45910400 | -3.36531400 | -1.12946200 |
| C  | -0.96411400 | -1.44338100 | -3.15654000 |
| C  | -2.05366100 | -1.95707100 | -2.35790900 |
| C  | -1.80884500 | -2.89910700 | -1.36587700 |
| C  | -2.47924000 | -2.79244600 | -0.08048800 |
| C  | -1.53710700 | -3.19610000 | 0.94714700  |
| C  | -1.50994600 | -2.52457100 | 2.16238200  |
| C  | -0.24292500 | -2.18943000 | 2.77691600  |
| C  | -0.38896800 | -0.86836600 | 3.40412200  |
| C  | 0.65389600  | 0.03758700  | 3.39467400  |
| C  | 2.80436400  | 1.71036600  | -0.12949500 |
| C  | 1.47758500  | 1.95821300  | 2.36719800  |
| C  | 1.85175400  | -2.54474000 | -1.26253300 |
| N  | 5.89127100  | 0.30658800  | -0.23577200 |
| H  | 5.78720500  | 0.31298900  | -1.25308600 |
| H  | 6.88743700  | 0.19707400  | -0.03327200 |
| Li | 0.60812000  | 0.41619000  | -1.07267100 |
| H  | 2.73921000  | 3.89266200  | 0.13370700  |
| H  | 5.60647500  | 1.22675600  | 0.11146900  |
| B  | 5.07920200  | -0.90820000 | 0.47304400  |
| H  | 5.35922100  | -1.91501400 | -0.11509600 |
| H  | 5.34073700  | -0.87977300 | 1.64265500  |

$Li@C_{60}^{6-6}$

1 1

|   |             |            |             |
|---|-------------|------------|-------------|
| C | 0.02719800  | 3.48507600 | -0.68375900 |
| C | -1.17007600 | 3.02633600 | -1.36965800 |
| C | -2.26373500 | 2.57394500 | -0.63292200 |
| C | -2.21827400 | 2.57594100 | 0.81793500  |
| C | -1.07488400 | 3.02514800 | 1.47204800  |
| C | 0.07271100  | 3.47709300 | 0.70181700  |
| C | 1.17384000  | 3.03657300 | -1.44978400 |
| C | 0.68101800  | 2.30502500 | -2.60545700 |
| C | -0.77065000 | 2.30716000 | -2.55262300 |
| C | -1.49634300 | 1.18038100 | -2.95490800 |
| C | -3.02556200 | 1.43129800 | -1.05607100 |
| C | -2.95120200 | 1.43370100 | 1.29016000  |
| C | -2.47751900 | 0.74171500 | 2.37389200  |
| C | -1.27972300 | 1.17574000 | 3.05150800  |
| C | -0.59307300 | 2.30806900 | 2.62321900  |
| C | 0.85666800  | 2.30325000 | 2.57721400  |
| C | 1.26967400  | 3.02991800 | 1.38949000  |
| C | 2.36721000  | 2.59839900 | 0.65708800  |



|    |             |             |             |
|----|-------------|-------------|-------------|
| C  | 2.31654900  | 2.59811700  | -0.79437500 |
| C  | 1.35720300  | 1.17672600  | -3.05478300 |
| C  | 2.55591200  | 0.72658300  | -2.37586400 |
| C  | 3.02233000  | 1.42033500  | -1.26700900 |
| C  | 3.50979800  | 0.69397100  | -0.10867500 |
| C  | 3.10449000  | 1.42264200  | 1.07922600  |
| C  | 2.70811600  | 0.72738900  | 2.21304500  |
| C  | 1.56074200  | 1.17589900  | 2.97583600  |
| C  | 0.84532400  | 0.00027700  | 3.44075800  |
| C  | -0.54073000 | 0.00029000  | 3.47187300  |
| C  | -3.73168200 | 0.79187500  | 0.14064200  |
| C  | -1.07492400 | -3.02488800 | 1.47254800  |
| C  | -2.21830700 | -2.57577100 | 0.81835700  |
| C  | -2.26376800 | -2.57400500 | -0.63250000 |
| C  | -1.17012000 | -3.02653900 | -1.36916500 |
| C  | 0.02714800  | -3.48518200 | -0.68318800 |
| C  | 1.26963100  | -3.02970600 | 1.38998700  |
| C  | 0.85663600  | -2.30283800 | 2.57759400  |
| C  | -0.59310700 | -2.30762800 | 2.62360300  |
| C  | -1.27974200 | -1.17521700 | 3.05170200  |
| C  | -2.47753000 | -0.74128600 | 2.37401600  |
| C  | -2.95121300 | -1.43344200 | 1.29039100  |
| C  | -3.02558100 | -1.43141600 | -1.05583700 |
| C  | -2.64518400 | -0.74444100 | -2.18699400 |
| C  | -1.49637500 | -1.18085000 | -2.95474500 |
| C  | -0.77068900 | -2.30756600 | -2.55225500 |
| C  | 0.68098500  | -2.30546000 | -2.60508200 |
| C  | 1.17379600  | -3.03682100 | -1.44928600 |
| C  | 2.31651300  | -2.59827200 | -0.79394900 |
| C  | 2.36717200  | -2.59831900 | 0.65751300  |
| C  | 1.56072600  | -1.17543000 | 2.97602800  |
| C  | 2.70810500  | -0.72706100 | 2.21316300  |
| C  | 3.10447100  | -1.42250600 | 1.07946000  |
| C  | 3.50979000  | -0.69403400 | -0.10856100 |
| C  | 3.02231000  | -1.42057800 | -1.26677700 |
| C  | 2.55590200  | -0.72700100 | -2.37574600 |
| C  | 1.35718200  | -1.17723900 | -3.05458700 |
| C  | 0.60814400  | -0.00028300 | -3.47096600 |
| C  | -0.78574500 | -0.00027300 | -3.43382800 |
| C  | -3.73168000 | -0.79178900 | 0.14077000  |
| C  | -2.64516900 | 0.74412500  | -2.18710800 |
| C  | 0.07266300  | -3.47697700 | 0.70238700  |
| Li | -0.61024200 | -0.00038600 | -1.22418000 |
| H  | -4.77676000 | -1.12042100 | 0.16595100  |
| H  | -4.77675800 | 1.12051100  | 0.16574700  |

$Li@C_{60}^{6-5}ts$

11

|   |             |            |            |
|---|-------------|------------|------------|
| C | 0.84508900  | 1.84114800 | 2.76113400 |
| C | -0.30004800 | 2.62743100 | 2.34603600 |
| C | -1.58099000 | 2.12494100 | 2.51427900 |
| C | -1.77559900 | 0.81580600 | 3.11469800 |
| C | -0.68070100 | 0.07002100 | 3.52855400 |

|   |             |             |             |
|---|-------------|-------------|-------------|
| C | 0.65963800  | 0.59470300  | 3.34872300  |
| C | 1.91234300  | 2.04983300  | 1.80968100  |
| C | 1.42058100  | 3.00079200  | 0.79079800  |
| C | 0.05529000  | 3.33084200  | 1.12224900  |
| C | -0.90405100 | 3.50219200  | 0.12053600  |
| C | -2.57560900 | 2.29463000  | 1.46744000  |
| C | -2.88099000 | 0.17243100  | 2.43404200  |
| C | -2.83821100 | -1.19379300 | 2.18278700  |
| C | -1.69248200 | -1.97423900 | 2.60994400  |
| C | -0.63776700 | -1.35839300 | 3.26932600  |
| C | 0.72936500  | -1.70824200 | 2.93491800  |
| C | 1.52402400  | -0.49551900 | 2.97406500  |
| C | 2.54395500  | -0.28618000 | 2.04246300  |
| C | 2.76238300  | 1.01848900  | 1.47335700  |
| C | 1.79657000  | 2.80811100  | -0.53508600 |
| C | 2.69340900  | 1.72325800  | -0.91606700 |
| C | 3.43216000  | 0.89869100  | 0.09922700  |
| C | 3.33116500  | -0.63354000 | -0.19164000 |
| C | 2.80694000  | -1.28322700 | 1.03083200  |
| C | 2.04841400  | -2.43746600 | 0.99359100  |
| C | 0.98255900  | -2.65199200 | 1.95343400  |
| C | -0.11822500 | -3.30761900 | 1.26944800  |
| C | -1.42556600 | -2.97156500 | 1.58863300  |
| C | -3.37109500 | 1.08023600  | 1.41409900  |
| C | -2.53672700 | -2.08423800 | -1.81368100 |
| C | -3.36990800 | -1.03348300 | -1.46033700 |
| C | -3.17499300 | 0.27625100  | -2.05434400 |
| C | -2.15656800 | 0.47630000  | -2.97444100 |
| C | -1.27848600 | -0.62269000 | -3.34096100 |
| C | -0.32554500 | -2.65304600 | -2.35524900 |
| C | -0.67974200 | -3.34189900 | -1.12555700 |
| C | -2.04835800 | -2.99562200 | -0.79189300 |
| C | -2.40995400 | -2.81047900 | 0.53382800  |
| C | -3.28520500 | -1.71124500 | 0.90430700  |
| C | -3.75006000 | -0.84144900 | -0.07146200 |
| C | -3.44203800 | 1.27830400  | -1.03456700 |
| C | -2.69030000 | 2.44230000  | -0.98230200 |
| C | -1.62048800 | 2.65154400  | -1.94340000 |
| C | -1.36029200 | 1.68832500  | -2.91257500 |
| C | 0.01065700  | 1.33134700  | -3.22815100 |
| C | 0.05902800  | -0.09878000 | -3.51528900 |
| C | 1.16249400  | -0.83459500 | -3.10383200 |
| C | 0.95823500  | -2.14731000 | -2.51639600 |
| C | 0.26206800  | -3.49802100 | -0.11759600 |
| C | 1.59410600  | -2.95043800 | -0.29106900 |
| C | 1.93388300  | -2.29899000 | -1.46264200 |
| C | 2.73038000  | -1.07709700 | -1.40995500 |
| C | 2.29448200  | -0.20430500 | -2.44006600 |
| C | 2.22701900  | 1.18661800  | -2.12499800 |
| C | 1.06351900  | 1.96808400  | -2.58345800 |
| C | 0.79946600  | 2.97951300  | -1.58530500 |
| C | -0.52296900 | 3.31023100  | -1.25832200 |
| C | -3.79821200 | 0.58402800  | 0.19006700  |
| C | -2.24330200 | 2.96124300  | 0.29867100  |
| C | -1.47340600 | -1.87990200 | -2.78057000 |

|    |            |             |             |
|----|------------|-------------|-------------|
| N  | 6.00852200 | -0.72691600 | -0.13759300 |
| H  | 4.77855700 | -0.86333800 | -0.24545800 |
| H  | 6.37898100 | -1.00919200 | -1.04650400 |
| H  | 6.26590300 | -1.42046700 | 0.56662300  |
| B  | 6.26578700 | 0.69447300  | 0.24311300  |
| H  | 6.51983100 | 1.45107100  | -0.63370300 |
| H  | 4.52385400 | 1.21389000  | 0.17104200  |
| H  | 6.31718400 | 0.93981800  | 1.40239000  |
| Li | 0.55970200 | 1.03019900  | -0.55551700 |

$Li@C_{60}^{6-5}ts_2$

1 1

|   |             |             |             |
|---|-------------|-------------|-------------|
| C | -1.06593700 | 0.09464500  | -3.43831000 |
| C | -0.08397000 | 1.15078500  | -3.33171600 |
| C | 1.25278500  | 0.85370200  | -3.07058600 |
| C | 1.64134700  | -0.54199000 | -2.91996600 |
| C | 0.69416500  | -1.55851300 | -3.03175300 |
| C | -0.68833300 | -1.24115100 | -3.30693800 |
| C | -2.30672700 | 0.56267200  | -2.83920000 |
| C | -2.09759400 | 1.91386800  | -2.34986100 |
| C | -0.72309300 | 2.28196500  | -2.63618700 |
| C | -0.00788400 | 3.05541200  | -1.73423500 |
| C | 2.05453400  | 1.66424100  | -2.15524900 |
| C | 2.63587000  | -0.59223900 | -1.87636800 |
| C | 2.65477500  | -1.65335100 | -0.98708300 |
| C | 1.69009000  | -2.72752800 | -1.10338900 |
| C | 0.72255700  | -2.67384400 | -2.10030000 |
| C | -0.64674600 | -3.04817600 | -1.80125000 |
| C | -1.52086200 | -2.15375900 | -2.54277000 |
| C | -2.69705400 | -1.70366400 | -1.96398800 |
| C | -3.10022800 | -0.31660900 | -2.11744500 |
| C | -2.69438500 | 2.32803600  | -1.16218500 |
| C | -3.52607700 | 1.40558700  | -0.40880200 |
| C | -3.71939500 | 0.11428900  | -0.87466600 |
| C | -3.69051400 | -1.00729000 | 0.04836300  |
| C | -3.05883900 | -2.12601200 | -0.62145000 |
| C | -2.22579000 | -2.98115700 | 0.08669400  |
| C | -0.98757700 | -3.44398500 | -0.51677500 |
| C | 0.02211300  | -3.50103500 | 0.52577900  |
| C | 1.33448000  | -3.14942400 | 0.23953100  |
| C | 2.83933500  | 0.77442000  | -1.38915900 |
| C | 1.70971700  | -0.58259000 | 2.84773600  |
| C | 2.48921200  | 0.31263500  | 2.11461500  |
| C | 2.12775000  | 1.69606200  | 1.98608000  |
| C | 0.94032900  | 2.11860400  | 2.53958400  |
| C | 0.10803300  | 1.20298300  | 3.28012200  |
| C | -0.49277100 | -1.18497400 | 3.34437500  |
| C | 0.13589900  | -2.31036300 | 2.67220500  |
| C | 1.50327300  | -1.94137900 | 2.37086500  |
| C | 2.09057900  | -2.34893500 | 1.18476600  |
| C | 2.92493300  | -1.42625700 | 0.42926500  |
| C | 3.07280000  | -0.11958300 | 0.86764400  |
| C | 2.74566700  | 2.30721700  | 0.71363800  |

|    |             |             |             |
|----|-------------|-------------|-------------|
| C  | 1.64948900  | 2.98894800  | -0.08785600 |
| C  | 0.39293200  | 3.41839000  | 0.52256000  |
| C  | 0.04369000  | 3.03664400  | 1.80365800  |
| C  | -1.31556900 | 2.65450900  | 2.09935100  |
| C  | -1.28038900 | 1.52791600  | 3.01666500  |
| C  | -2.22127600 | 0.51414100  | 2.91462500  |
| C  | -1.81710100 | -0.87326800 | 3.07612400  |
| C  | -0.59121600 | -3.07347700 | 1.76857900  |
| C  | -1.97811900 | -2.74896300 | 1.49481900  |
| C  | -2.57903100 | -1.67232600 | 2.13761500  |
| C  | -3.45261900 | -0.78346900 | 1.39738900  |
| C  | -3.24194700 | 0.57042900  | 1.88398700  |
| C  | -3.27775100 | 1.64072500  | 1.00452800  |
| C  | -2.30335000 | 2.71186000  | 1.11600100  |
| C  | -1.94595400 | 3.13199600  | -0.21772600 |
| C  | -0.62690000 | 3.48692900  | -0.50484700 |
| C  | 3.25688500  | 1.02175600  | -0.03554600 |
| C  | 1.41269000  | 2.74370700  | -1.42992500 |
| C  | 0.49083600  | -0.12482800 | 3.45459300  |
| N  | 5.89317600  | 0.33701700  | -0.24136600 |
| H  | 6.15041900  | 0.41654000  | -1.22669100 |
| H  | 6.45316600  | 0.98981300  | 0.31054400  |
| H  | 4.73395300  | 0.80567700  | -0.17834600 |
| B  | 5.85866400  | -1.05645500 | 0.29844500  |
| H  | 5.75012200  | -1.93944100 | -0.48169400 |
| H  | 5.99181700  | -1.18363600 | 1.46707500  |
| Li | 0.25985900  | 0.92972800  | -0.98936900 |
| H  | 3.56477400  | 2.99540900  | 0.95720600  |

$Li@C_{60}^{6-5}$

11

|   |             |             |             |
|---|-------------|-------------|-------------|
| C | -1.32658200 | 2.47679900  | -2.21156200 |
| C | -0.22255900 | 3.18560600  | -1.60211200 |
| C | 1.08605800  | 2.80481500  | -1.88503300 |
| C | 1.34063800  | 1.69635900  | -2.76737500 |
| C | 0.29182100  | 1.02107600  | -3.34522000 |
| C | -1.07050800 | 1.41347300  | -3.07137800 |
| C | -2.39383100 | 2.36867900  | -1.23345000 |
| C | -1.93939600 | 3.00965800  | -0.00938300 |
| C | -0.59624400 | 3.51312700  | -0.24342600 |
| C | 0.35793000  | 3.44062600  | 0.76552400  |
| C | 2.07401100  | 2.72885300  | -0.82993500 |
| C | 2.50638500  | 0.96285200  | -2.23283900 |
| C | 2.53231100  | -0.48472900 | -2.34386200 |
| C | 1.39776500  | -1.16939300 | -2.99726800 |
| C | 0.32167100  | -0.45029100 | -3.46136000 |
| C | -1.02404500 | -0.93623100 | -3.26022300 |
| C | -1.88049000 | 0.20945300  | -3.00734900 |
| C | -2.90479700 | 0.11411000  | -2.07836100 |
| C | -3.16046200 | 1.21583900  | -1.16740500 |
| C | -2.27989200 | 2.47183800  | 1.22092300  |
| C | -3.08914900 | 1.26607200  | 1.29155900  |
| C | -3.51773300 | 0.65161400  | 0.12331800  |

|    |             |             |             |
|----|-------------|-------------|-------------|
| C  | -3.48885800 | -0.79273000 | 0.00725100  |
| C  | -3.11226800 | -1.12854500 | -1.35593800 |
| C  | -2.30295600 | -2.22602900 | -1.60463000 |
| C  | -1.23539700 | -2.13254000 | -2.58293800 |
| C  | -0.10183100 | -2.88693400 | -2.09031100 |
| C  | 1.18956000  | -2.41287600 | -2.30392200 |
| C  | 2.95797700  | 1.58481800  | -1.10081300 |
| C  | 2.29701800  | -2.33147600 | 1.20349300  |
| C  | 3.09045400  | -1.20009200 | 1.14266400  |
| C  | 2.81406100  | -0.09994700 | 2.02908700  |
| C  | 1.79903000  | -0.19965400 | 3.00385000  |
| C  | 0.99162000  | -1.39902000 | 3.08055300  |
| C  | 0.11991100  | -3.15265500 | 1.56666700  |
| C  | 0.49630700  | -3.49757200 | 0.20710300  |
| C  | 1.84108000  | -3.01446300 | -0.02947900 |
| C  | 2.17868300  | -2.46651500 | -1.24683000 |
| C  | 3.02000800  | -1.26386500 | -1.32959400 |
| C  | 3.77873600  | -0.71530900 | -0.13960500 |
| C  | 3.04314200  | 1.13601200  | 1.32958000  |
| C  | 2.20178800  | 2.19988400  | 1.56554100  |
| C  | 1.13751400  | 2.10610400  | 2.53676600  |
| C  | 0.94201000  | 0.93478300  | 3.26328100  |
| C  | -0.40430400 | 0.44503200  | 3.49724800  |
| C  | -0.37664800 | -1.00306300 | 3.38143700  |
| C  | -1.43704900 | -1.67094800 | 2.77776600  |
| C  | -1.18353200 | -2.77163400 | 1.85859500  |
| C  | -0.45940300 | -3.44419800 | -0.80421200 |
| C  | -1.82053500 | -3.03646000 | -0.49704900 |
| C  | -2.17883800 | -2.71563200 | 0.80286200  |
| C  | -3.03505300 | -1.56907400 | 1.06398100  |
| C  | -2.57854100 | -0.92999900 | 2.28154400  |
| C  | -2.60273200 | 0.45947900  | 2.39219900  |
| C  | -1.49193700 | 1.15744000  | 3.00548300  |
| C  | -1.28575900 | 2.39891600  | 2.27629600  |
| C  | 0.00039400  | 2.86619000  | 2.04953200  |
| C  | 3.74383900  | 0.88809100  | -0.01126700 |
| C  | 1.71753500  | 3.05099700  | 0.45808600  |
| C  | 1.23256800  | -2.44122200 | 2.17991000  |
| H  | 4.77644900  | 1.25240000  | 0.01459500  |
| H  | 4.82541300  | -1.03673500 | -0.15981300 |
| Li | 0.79839100  | -0.54289100 | 1.01247500  |

### Li@C<sub>70</sub>

|     |             |             |            |
|-----|-------------|-------------|------------|
| 1 1 |             |             |            |
| C   | -3.21656700 | -0.86177800 | 2.23255400 |
| C   | -2.44530700 | -2.08342500 | 2.13791500 |
| C   | -3.96146000 | -0.41781800 | 1.14362100 |
| C   | -2.46512900 | -2.83859000 | 0.97210400 |
| C   | -1.22298600 | -3.42177900 | 0.48094800 |
| C   | -0.01363200 | -3.32962900 | 1.22462800 |
| C   | 1.18702300  | -3.42126500 | 0.47940100 |
| C   | -3.19471600 | 1.87868900  | 1.54315700 |
| C   | -2.41631200 | 1.40692000  | 2.67056600 |
| C   | -3.95372000 | 0.99149100  | 0.79269700 |

|   |             |             |             |
|---|-------------|-------------|-------------|
| C | -2.43069400 | 0.07087900  | 3.01161900  |
| C | -1.19597700 | -0.58301100 | 3.40642700  |
| C | 0.01130800  | 0.14078800  | 3.55240700  |
| C | 1.20738000  | -0.60340500 | 3.40112800  |
| C | -0.00783100 | -2.54809300 | 2.46993700  |
| C | -1.20562800 | -1.90710700 | 2.87367500  |
| C | 1.19898000  | -1.92642400 | 2.87067900  |
| C | -3.19298000 | 2.07378700  | -1.27399800 |
| C | -2.40650400 | 2.99600600  | -0.48496400 |
| C | -3.95330100 | 1.09186600  | -0.65475500 |
| C | -2.40740300 | 2.90105400  | 0.89068400  |
| C | -1.16731300 | 3.06918800  | 1.62754700  |
| C | 0.03554700  | 3.42471600  | 0.97378800  |
| C | 1.23370300  | 3.04652700  | 1.62587800  |
| C | 0.02203900  | 1.56646000  | 3.19676600  |
| C | -1.17454500 | 2.15475600  | 2.72167300  |
| C | 1.22754800  | 2.13283300  | 2.71890000  |
| C | -3.21307000 | -0.54516600 | -2.33525400 |
| C | -2.42638200 | 0.48597400  | -2.97658800 |
| C | -3.95967400 | -0.25576300 | -1.19709500 |
| C | -2.41353200 | 1.76263700  | -2.45512100 |
| C | -1.17199300 | 2.51120100  | -2.40044000 |
| C | 0.02534800  | 1.99312200  | -2.94948700 |
| C | 1.23053400  | 2.48881500  | -2.39831700 |
| C | 0.03634900  | 3.52673900  | -0.49246200 |
| C | -1.16612700 | 3.26543300  | -1.19003100 |
| C | 1.23537700  | 3.24222500  | -1.18875900 |
| C | -3.24226800 | -2.38168400 | -0.16730200 |
| C | -2.46076400 | -2.67308600 | -1.35593800 |
| C | -3.96872400 | -1.18788300 | -0.08581500 |
| C | -2.44059300 | -1.76716200 | -2.40708900 |
| C | -1.20166400 | -1.49257900 | -3.11202300 |
| C | -0.00497000 | -2.18382300 | -2.79935000 |
| C | 1.20186700  | -1.51261600 | -3.10881900 |
| C | 0.01518800  | 0.63003700  | -3.49780600 |
| C | -1.19145700 | -0.10708000 | -3.45597400 |
| C | 1.21077200  | -0.12838900 | -3.45114800 |
| C | -0.01176200 | -3.12831800 | -1.67190800 |
| C | -1.22098600 | -3.31970700 | -0.94871400 |
| C | 1.18779000  | -3.32264100 | -0.94551300 |
| C | 3.22563100  | -0.59964000 | -2.33470100 |
| C | 2.43659000  | -1.80830900 | -2.40641800 |
| C | 2.43246200  | -2.69659800 | -1.35056100 |
| C | 3.97207400  | -0.32186200 | -1.19685800 |
| C | 3.24421700  | 2.02126100  | -1.27506100 |
| C | 2.46195100  | 1.72169500  | -2.45377300 |
| C | 2.45553800  | 0.44416200  | -2.97276100 |
| C | 3.98314400  | 1.02358700  | -0.65488500 |
| C | 3.24318400  | 1.82595500  | 1.54413100  |
| C | 2.47138000  | 2.85879900  | 0.88995100  |
| C | 2.47202800  | 2.95401300  | -0.48481400 |
| C | 3.98192300  | 0.92294200  | 0.79238800  |
| C | 3.22422200  | -0.91604000 | 2.23211900  |
| C | 2.45237900  | 0.02988000  | 3.00601000  |
| C | 2.45923300  | 1.36629900  | 2.66863900  |

|    |             |             |             |
|----|-------------|-------------|-------------|
| C  | 3.97124700  | -0.48403100 | 1.14345100  |
| C  | 3.21154600  | -2.41709100 | -0.16634100 |
| C  | 2.43058800  | -2.85527200 | 0.96745800  |
| C  | 2.43513000  | -2.12263200 | 2.13666900  |
| C  | 3.96556500  | -1.25247200 | -0.08570700 |
| Li | -1.34163100 | -1.19713200 | -0.02592500 |

*Li@C<sub>70</sub><sup>AB</sup>*

1 1

|   |             |             |             |
|---|-------------|-------------|-------------|
| C | -3.71310200 | -0.09430400 | -0.16209400 |
| C | -3.23078100 | -0.77497800 | -1.35021900 |
| C | -3.65624700 | 1.29962900  | -0.08297200 |
| C | -2.71106700 | -0.03559400 | -2.40229800 |
| C | -1.52659100 | -0.49653400 | -3.10699600 |
| C | -0.91444500 | -1.73549400 | -2.79388000 |
| C | 0.46205000  | -1.84837800 | -3.10500500 |
| C | -2.84516200 | 1.16047900  | 2.23388100  |
| C | -2.88196300 | -0.28394200 | 2.14047500  |
| C | -3.22027300 | 1.94075900  | 1.14444600  |
| C | -3.31553300 | -0.90016800 | 0.97696200  |
| C | -2.60755600 | -2.07532900 | 0.48888600  |
| C | -1.55303100 | -2.67107500 | 1.23228400  |
| C | -0.60774100 | -3.41904100 | 0.48862100  |
| C | -1.44443400 | -2.51416300 | -1.66319900 |
| C | -2.55484500 | -1.99889500 | -0.94029700 |
| C | -0.55399500 | -3.34091200 | -0.93571100 |
| C | -1.30559900 | 3.42586000  | 1.53791400  |
| C | -0.91903200 | 2.60515200  | 2.66614300  |
| C | -2.43060900 | 3.10590400  | 0.78899600  |
| C | -1.67256300 | 1.50157500  | 3.00931200  |
| C | -1.00877300 | 0.27284300  | 3.40717000  |
| C | 0.39738900  | 0.20467000  | 3.55021800  |
| C | 0.97833500  | -1.07866400 | 3.40409900  |
| C | -1.11323500 | -2.02331600 | 2.47760300  |
| C | -1.75246600 | -0.82398700 | 2.87762100  |
| C | 0.23571300  | -2.17554100 | 2.87732500  |
| C | -1.19828200 | 3.58000100  | -1.28086900 |
| C | -0.03117800 | 3.91126900  | -0.49403400 |
| C | -2.37530100 | 3.18614700  | -0.65839900 |
| C | -0.08357100 | 3.83609700  | 0.88184900  |
| C | 1.04210900  | 3.28905800  | 1.61812600  |
| C | 2.24009100  | 2.91592300  | 0.96458700  |
| C | 3.02713500  | 1.93827900  | 1.61853900  |
| C | 1.19792000  | 1.38238800  | 3.19086300  |
| C | 0.52944700  | 2.53490600  | 2.71390700  |
| C | 2.51537600  | 1.18425800  | 2.71418800  |
| C | -2.67246700 | 1.41071600  | -2.33394300 |
| C | -1.44546800 | 1.82925900  | -2.97709000 |
| C | -3.13140600 | 2.06867100  | -1.19692800 |
| C | -0.72466100 | 2.88525100  | -2.46000700 |
| C | 0.72357100  | 2.81604300  | -2.40610000 |
| C | 1.43106000  | 1.72010000  | -2.95509300 |
| C | 2.70908800  | 1.46486700  | -2.40428400 |

|    |             |             |             |
|----|-------------|-------------|-------------|
| C  | 2.29590300  | 2.99603600  | -0.50149900 |
| C  | 1.14929100  | 3.44379800  | -1.19883900 |
| C  | 3.13405300  | 2.09227200  | -1.19719000 |
| C  | 0.66448700  | 0.59059700  | -3.49969200 |
| C  | -0.74874000 | 0.64837000  | -3.45492500 |
| C  | 1.23793600  | -0.70337700 | -3.45112100 |
| C  | 4.12571500  | -0.03930900 | -1.27844700 |
| C  | 3.30716300  | 0.14295200  | -2.45642400 |
| C  | 2.59140600  | -0.91695400 | -2.97135400 |
| C  | 4.18600500  | -1.27798800 | -0.65472500 |
| C  | 4.01884100  | -0.19402700 | 1.54096200  |
| C  | 3.95057100  | 1.09203900  | 0.88382000  |
| C  | 4.00281600  | 1.16734200  | -0.49146900 |
| C  | 4.13111700  | -1.35738300 | 0.79228900  |
| C  | 2.47991800  | -2.46094500 | 2.23612100  |
| C  | 2.36494700  | -1.24389100 | 3.00734500  |
| C  | 3.11411500  | -0.13743700 | 2.66736200  |
| C  | 3.34058800  | -2.52004400 | 1.14755200  |
| C  | 1.63352100  | -3.70856400 | -0.15798200 |
| C  | 0.74144500  | -3.63773200 | 0.97661500  |
| C  | 1.15347000  | -3.02706100 | 2.14317800  |
| C  | 2.90763600  | -3.15949500 | -0.07948300 |
| C  | 2.65344400  | -2.21144500 | -2.33067400 |
| C  | 1.32566100  | -2.77823400 | -2.40052600 |
| C  | 0.82908600  | -3.51018600 | -1.34190400 |
| C  | 3.42955200  | -2.39213700 | -1.19311600 |
| N  | -7.83543100 | -2.32640800 | -0.00326200 |
| H  | -8.04057700 | -2.72212500 | -0.92071000 |
| H  | -7.89027400 | -3.08226000 | 0.67930800  |
| H  | -8.57404400 | -1.65815400 | 0.21666500  |
| B  | -6.36210300 | -1.60293400 | 0.02173500  |
| H  | -6.41540400 | -0.72946000 | -0.81592200 |
| H  | -6.22983400 | -1.17560300 | 1.14762300  |
| H  | -5.56516000 | -2.47697900 | -0.25371300 |
| Li | -1.49109700 | -0.10593200 | -0.10730900 |

*Li@C<sub>70</sub><sup>6-</sup>ts1*

|    |             |             |             |
|----|-------------|-------------|-------------|
| 11 |             |             |             |
| C  | 2.99122100  | 0.48267000  | -2.30710400 |
| C  | 2.61687700  | -0.92726600 | -2.34256800 |
| C  | 3.59616100  | 0.99009800  | -1.15583300 |
| C  | 2.89012500  | -1.76095000 | -1.28795300 |
| C  | 1.90069400  | -2.73072200 | -0.87158900 |
| C  | 0.70803000  | -2.94159500 | -1.60565100 |
| C  | -0.38378800 | -3.48729100 | -0.88816100 |
| C  | 2.13888000  | 2.98153400  | -1.29493200 |
| C  | 1.51675200  | 2.44152000  | -2.47125300 |
| C  | 3.16463100  | 2.28126800  | -0.64306600 |
| C  | 1.92762700  | 1.20752000  | -2.95315800 |
| C  | 0.93514000  | 0.25873900  | -3.43083700 |
| C  | -0.43834400 | 0.59434900  | -3.50189300 |
| C  | -1.34618300 | -0.49017700 | -3.45223300 |
| C  | 0.42768000  | -2.06667000 | -2.74655700 |



|   |             |             |             |
|---|-------------|-------------|-------------|
| C | 1.35818200  | -1.04814800 | -3.05599700 |
| C | -0.92141600 | -1.79887500 | -3.08166900 |
| C | 2.16535900  | 2.84129400  | 1.53790000  |
| C | 1.11073100  | 3.56432100  | 0.85441900  |
| C | 3.17875200  | 2.20924900  | 0.80224700  |
| C | 1.09812200  | 3.63252700  | -0.52420100 |
| C | -0.15659700 | 3.50730500  | -1.24413300 |
| C | -1.39100700 | 3.39952800  | -0.55894700 |
| C | -2.43535900 | 2.75033700  | -1.25761300 |
| C | -0.87366800 | 1.90020200  | -2.98333700 |
| C | 0.09883400  | 2.76906900  | -2.43631700 |
| C | -2.17974700 | 2.01104900  | -2.44820100 |
| C | 3.03138100  | 0.25369300  | 2.28109600  |
| C | 1.97987700  | 0.90980700  | 3.01311900  |
| C | 3.61878700  | 0.87421800  | 1.17713800  |
| C | 1.56245400  | 2.18560800  | 2.66408600  |
| C | 0.14446500  | 2.51317600  | 2.68776100  |
| C | -0.81879900 | 1.59281800  | 3.16280600  |
| C | -2.13402600 | 1.75515600  | 2.66504700  |
| C | -1.37792800 | 3.32619300  | 0.91000200  |
| C | -0.13152400 | 3.36699600  | 1.58103800  |
| C | -2.41033300 | 2.60985200  | 1.55895800  |
| C | 3.68289700  | -1.30628200 | -0.10132400 |
| C | 2.90870600  | -1.87677700 | 1.04570600  |
| C | 3.94226800  | 0.12553500  | -0.03327000 |
| C | 2.65644100  | -1.15411900 | 2.18318100  |
| C | 1.41096500  | -1.34665300 | 2.90325900  |
| C | 0.47433800  | -2.33050100 | 2.51059900  |
| C | -0.86838200 | -2.09815200 | 2.89378900  |
| C | -0.37593700 | 0.24186100  | 3.54082000  |
| C | 0.99534600  | -0.08332800 | 3.41239500  |
| C | -1.28569600 | -0.83311100 | 3.40036200  |
| C | 0.73393700  | -3.08755400 | 1.28377400  |
| C | 1.91316400  | -2.80175700 | 0.55258400  |
| C | -0.37106800 | -3.55971800 | 0.53418700  |
| C | -3.09686200 | -1.76555700 | 2.22391500  |
| C | -1.97665500 | -2.67702500 | 2.15814200  |
| C | -1.73318200 | -3.39333000 | 1.00466300  |
| C | -3.92832800 | -1.60033700 | 1.12438700  |
| C | -3.94641300 | 0.82838700  | 1.48574100  |
| C | -3.07321300 | 0.64808100  | 2.62266200  |
| C | -2.65984100 | -0.61634500 | 2.98432200  |
| C | -4.36505700 | -0.27096500 | 0.74559200  |
| C | -3.97166900 | 0.96922900  | -1.33523900 |
| C | -3.53440500 | 2.10574500  | -0.55814700 |
| C | -3.52211900 | 2.03710600  | 0.81802300  |
| C | -4.37854400 | -0.19878400 | -0.70127300 |
| C | -3.13769100 | -1.53700300 | -2.34364100 |
| C | -2.71262800 | -0.31715200 | -2.99261900 |
| C | -3.11930300 | 0.90453400  | -2.50031400 |
| C | -3.94950900 | -1.48348100 | -1.21831500 |
| C | -2.59868000 | -3.23094800 | -0.14309000 |
| C | -1.75378500 | -3.27581600 | -1.31581200 |
| C | -2.01697300 | -2.44897800 | -2.38820400 |
| C | -3.67115600 | -2.35164200 | -0.08965200 |

|    |            |             |             |
|----|------------|-------------|-------------|
| N  | 6.75219100 | -0.88485100 | -0.17536300 |
| H  | 7.13463200 | -0.85270200 | -1.12232000 |
| H  | 7.50083300 | -0.63243300 | 0.47335400  |
| H  | 6.02194500 | -0.14553600 | -0.10158600 |
| B  | 6.11651100 | -2.29279500 | 0.18558100  |
| H  | 4.83348900 | -2.06082700 | -0.15805700 |
| H  | 6.45676900 | -3.15778900 | -0.56012100 |
| H  | 6.05639000 | -2.44707500 | 1.36771500  |
| Li | 1.71667700 | 0.63764400  | 0.01431200  |

$Li@C_{70}^{6-}ts2$

1 1

|   |             |             |             |
|---|-------------|-------------|-------------|
| C | -2.86293000 | -0.98416400 | 2.32463500  |
| C | -2.07693800 | -2.21240600 | 2.12677400  |
| C | -3.61677300 | -0.50652200 | 1.24901600  |
| C | -2.13436400 | -2.89845400 | 0.94472600  |
| C | -0.91665300 | -3.42090900 | 0.38605800  |
| C | 0.32150100  | -3.37880500 | 1.08353600  |
| C | 1.49191800  | -3.44423400 | 0.29270400  |
| C | -2.87336900 | 1.80390100  | 1.76517400  |
| C | -2.06991200 | 1.29908500  | 2.83939500  |
| C | -3.63291500 | 0.91639800  | 0.97826700  |
| C | -2.05612000 | -0.08300200 | 3.09561100  |
| C | -0.79390700 | -0.74165300 | 3.40269100  |
| C | 0.41832800  | -0.01599900 | 3.54227100  |
| C | 1.61078400  | -0.74441300 | 3.32690700  |
| C | 0.37451800  | -2.65910400 | 2.35182200  |
| C | -0.81313500 | -2.03826500 | 2.80916800  |
| C | 1.58884100  | -2.04613900 | 2.73915700  |
| C | -2.97949100 | 2.11950100  | -1.08290800 |
| C | -2.15864500 | 3.00037900  | -0.27191600 |
| C | -3.71270700 | 1.08011700  | -0.45653000 |
| C | -2.10460500 | 2.85148400  | 1.10196500  |
| C | -0.83966500 | 2.99549900  | 1.79436000  |
| C | 0.34373100  | 3.38898700  | 1.11300400  |
| C | 1.56235300  | 2.98954900  | 1.70273400  |
| C | 0.41088000  | 1.42702500  | 3.24905200  |
| C | -0.80835600 | 2.03270800  | 2.84784300  |
| C | 1.59456500  | 2.01969300  | 2.75129000  |
| C | -3.02827300 | -0.47681300 | -2.22390800 |
| C | -2.27400900 | 0.57299100  | -2.82367400 |
| C | -3.68255500 | -0.25265900 | -1.02033400 |
| C | -2.26129100 | 1.85980100  | -2.27694900 |
| C | -1.00236500 | 2.59832100  | -2.23569100 |
| C | 0.17219900  | 2.10407000  | -2.84746900 |
| C | 1.39770200  | 2.58413000  | -2.32657400 |
| C | 0.28478300  | 3.55326300  | -0.34554100 |
| C | -0.94687800 | 3.31460800  | -1.00731700 |
| C | 1.45465800  | 3.30036600  | -1.09532500 |
| C | -3.16681800 | -2.62740200 | -0.15809500 |
| C | -2.22649100 | -2.64691600 | -1.37224100 |
| C | -3.85439300 | -1.25409000 | 0.02042700  |
| C | -2.24639500 | -1.71256300 | -2.36668000 |

|    |             |             |             |
|----|-------------|-------------|-------------|
| C  | -1.03998600 | -1.38380800 | -3.09232300 |
| C  | 0.17201600  | -2.07967000 | -2.87411100 |
| C  | 1.35802100  | -1.38564600 | -3.20569200 |
| C  | 0.14554800  | 0.75976800  | -3.44775100 |
| C  | -1.05430500 | 0.01144000  | -3.37619900 |
| C  | 1.34439700  | 0.01267700  | -3.49074600 |
| C  | 0.21032100  | -3.05971000 | -1.79275600 |
| C  | -0.97181400 | -3.26485300 | -1.03163700 |
| C  | 1.43644200  | -3.28585000 | -1.12465400 |
| C  | 3.40487300  | -0.49272900 | -2.47319700 |
| C  | 2.62010600  | -1.70413100 | -2.56744400 |
| C  | 2.66040700  | -2.63741600 | -1.55177900 |
| C  | 4.19507400  | -0.25849400 | -1.35708400 |
| C  | 3.45867800  | 2.08329700  | -1.30991800 |
| C  | 2.63089900  | 1.82821100  | -2.46602800 |
| C  | 2.60335900  | 0.57237400  | -3.03381800 |
| C  | 4.22516900  | 1.06210000  | -0.75902900 |
| C  | 3.56693000  | 1.77236900  | 1.49597700  |
| C  | 2.77462200  | 2.83135300  | 0.91549400  |
| C  | 2.72004300  | 2.98135700  | -0.45357700 |
| C  | 4.27995300  | 0.90184700  | 0.67817600  |
| C  | 3.58185300  | -0.99818700 | 2.06922100  |
| C  | 2.83423700  | -0.08794100 | 2.90774400  |
| C  | 2.82749700  | 1.26274600  | 2.62655900  |
| C  | 4.28473200  | -0.51709600 | 0.97257900  |
| C  | 3.48511200  | -2.39932300 | -0.38637900 |
| C  | 2.74792400  | -2.89122500 | 0.75746200  |
| C  | 2.79734100  | -2.20743900 | 1.95609300  |
| C  | 4.23546400  | -1.23767300 | -0.28623400 |
| Li | -1.39525600 | 0.30095300  | 0.99867700  |
| H  | -3.88499300 | -3.45551800 | -0.21678200 |
| N  | -6.47026600 | -0.37030200 | -0.03573100 |
| H  | -5.44697300 | -0.95822400 | 0.01423500  |
| H  | -7.04302300 | -0.92807900 | -0.67330300 |
| H  | -6.87378400 | -0.42189500 | 0.90145200  |
| B  | -6.24963200 | 1.04368900  | -0.53668300 |
| H  | -6.30628900 | 1.91173900  | 0.26459800  |
| H  | -6.24946900 | 1.18851500  | -1.71100800 |

$Li@C_{70}^{6-}1$

11

|   |             |             |             |
|---|-------------|-------------|-------------|
| C | 2.77487000  | 1.57669700  | 2.18454600  |
| C | 1.88743500  | 2.68106500  | 1.79047700  |
| C | 3.56600900  | 0.98300600  | 1.17830300  |
| C | 1.89132000  | 3.18541100  | 0.51499900  |
| C | 0.64844300  | 3.53053500  | -0.11502000 |
| C | -0.59031000 | 3.50110600  | 0.58269500  |
| C | -1.75214300 | 3.36050800  | -0.20919600 |
| C | 2.98138700  | -1.25040000 | 1.98457700  |
| C | 2.12318500  | -0.66032100 | 2.97790400  |
| C | 3.70425700  | -0.45483900 | 1.10724900  |
| C | 2.02079500  | 0.73674000  | 3.06739300  |
| C | 0.70146700  | 1.32684400  | 3.27006000  |

|   |             |             |             |
|---|-------------|-------------|-------------|
| C | -0.45266500 | 0.53269700  | 3.50277300  |
| C | -1.69525000 | 1.12842400  | 3.18373300  |
| C | -0.59945200 | 2.97101300  | 1.94266900  |
| C | 0.62725700  | 2.51756100  | 2.49022600  |
| C | -1.76817900 | 2.33069300  | 2.41593800  |
| C | 3.12674200  | -1.97182300 | -0.75480500 |
| C | 2.38376000  | -2.79878500 | 0.16227400  |
| C | 4.00811300  | -0.85918200 | -0.30228100 |
| C | 2.30250300  | -2.46309200 | 1.49610900  |
| C | 1.05616300  | -2.59706400 | 2.20326400  |
| C | -0.09227800 | -3.17775900 | 1.59158600  |
| C | -1.34074300 | -2.78915800 | 2.11578700  |
| C | -0.33220200 | -0.93012800 | 3.41632300  |
| C | 0.93654100  | -1.48458000 | 3.09451300  |
| C | -1.45843100 | -1.67972900 | 3.01346900  |
| C | 3.02791000  | 0.42230400  | -2.29034100 |
| C | 2.36104800  | -0.74097700 | -2.71070200 |
| C | 3.70077800  | 0.42305200  | -1.04496900 |
| C | 2.42400700  | -1.93885700 | -1.94735700 |
| C | 1.21924800  | -2.77357600 | -1.82398400 |
| C | 0.02510300  | -2.46509400 | -2.50430300 |
| C | -1.16751900 | -2.96014300 | -1.92551900 |
| C | -0.00837400 | -3.55189500 | 0.17435000  |
| C | 1.20532000  | -3.31846400 | -0.51722900 |
| C | -1.18572200 | -3.49597400 | -0.60494800 |
| C | 2.94045200  | 2.81711400  | -0.53873300 |
| C | 2.02871500  | 2.61944300  | -1.75093400 |
| C | 3.60049300  | 1.50251100  | -0.16881400 |
| C | 2.14155700  | 1.55387800  | -2.59644300 |
| C | 0.96859100  | 1.03676000  | -3.26420700 |
| C | -0.29628500 | 1.66334100  | -3.14897000 |
| C | -1.41987800 | 0.83772900  | -3.37132600 |
| C | -0.04112200 | -1.21812000 | -3.29375000 |
| C | 1.09806800  | -0.37588300 | -3.33528300 |
| C | -1.29197000 | -0.58441600 | -3.44550000 |
| C | -0.42384000 | 2.78474100  | -2.22226500 |
| C | 0.72987400  | 3.18636300  | -1.49930600 |
| C | -1.67069600 | 3.00554700  | -1.59048300 |
| C | -3.39828000 | -0.09917800 | -2.51455200 |
| C | -2.70932100 | 1.14325800  | -2.78515600 |
| C | -2.83432900 | 2.20893200  | -1.91680600 |
| C | -4.18274400 | -0.22953500 | -1.37688900 |
| C | -3.27238500 | -2.47697200 | -0.99191400 |
| C | -2.45231100 | -2.32793900 | -2.17145200 |
| C | -2.51147000 | -1.16819800 | -2.91323800 |
| C | -4.11956900 | -1.44770100 | -0.59489900 |
| C | -3.43008000 | -1.77060600 | 1.73791200  |
| C | -2.55367300 | -2.83994700 | 1.31713600  |
| C | -2.47779000 | -3.18369200 | -0.01543000 |
| C | -4.20093100 | -1.08698800 | 0.80444700  |
| C | -3.66570100 | 1.04387100  | 1.90490700  |
| C | -2.85911700 | 0.32514000  | 2.86649700  |
| C | -2.74436700 | -1.04733300 | 2.78274700  |
| C | -4.31707600 | 0.35684000  | 0.89004200  |
| C | -3.65211100 | 2.07921300  | -0.72790300 |

|    |             |             |             |
|----|-------------|-------------|-------------|
| C  | -2.96838200 | 2.78690800  | 0.33161100  |
| C  | -2.97601700 | 2.28131900  | 1.61643200  |
| C  | -4.31130500 | 0.88916600  | -0.45951700 |
| Li | 1.39361400  | 0.30505500  | 1.01285400  |
| H  | 3.65629200  | 3.63628200  | -0.69840700 |
| N  | 6.57548900  | -0.14410500 | -0.01132600 |
| H  | 7.54463300  | -0.36318300 | -0.25159000 |
| H  | 6.53554400  | -0.01274500 | 1.00177200  |
| H  | 6.34525400  | 0.75186300  | -0.44983100 |
| B  | 5.62094000  | -1.35718400 | -0.52789000 |
| H  | 5.83048600  | -1.49407900 | -1.70136100 |
| H  | 5.84946800  | -2.30693500 | 0.16841800  |

*Li@C<sub>70</sub><sup>6-6</sup>*

1 1

|   |             |             |             |
|---|-------------|-------------|-------------|
| C | 3.22169800  | -0.46622100 | -2.26990600 |
| C | 2.49841200  | -1.74684800 | -2.34262700 |
| C | 3.95581600  | -0.12681800 | -1.15695200 |
| C | 2.53174000  | -2.60440200 | -1.28322000 |
| C | 1.32116400  | -3.25973500 | -0.87101900 |
| C | 0.11132800  | -3.15329300 | -1.60619700 |
| C | -1.08249800 | -3.39107100 | -0.88786300 |
| C | 3.09992800  | 2.19405300  | -1.29956800 |
| C | 2.34463700  | 1.82692400  | -2.46605700 |
| C | 3.86305200  | 1.21012400  | -0.64261600 |
| C | 2.39232400  | 0.51301900  | -2.92548900 |
| C | 1.19330200  | -0.13428800 | -3.41006500 |
| C | -0.04311800 | 0.55641500  | -3.49209500 |
| C | -1.20943100 | -0.24164100 | -3.45148000 |
| C | 0.07777100  | -2.23953000 | -2.74407200 |
| C | 1.25522600  | -1.51150900 | -3.04317300 |
| C | -1.14858000 | -1.61788400 | -3.07852200 |
| C | 3.07690500  | 2.03323300  | 1.54236700  |
| C | 2.25465800  | 3.01359300  | 0.85965800  |
| C | 3.85397800  | 1.13464300  | 0.80134600  |
| C | 2.27378900  | 3.10972300  | -0.52571300 |
| C | 1.01984100  | 3.30998200  | -1.23925300 |
| C | -0.20874300 | 3.52836200  | -0.54982900 |
| C | -1.38707000 | 3.17659100  | -1.24704100 |
| C | -0.11304300 | 1.93099500  | -2.97322900 |
| C | 1.06380800  | 2.51789500  | -2.43103200 |
| C | -1.34004400 | 2.39149400  | -2.44134900 |
| C | 3.20726200  | -0.69542600 | 2.24167600  |
| C | 2.37313300  | 0.21249700  | 2.98960700  |
| C | 3.94923000  | -0.24901900 | 1.17826200  |
| C | 2.32077200  | 1.55670400  | 2.66068100  |
| C | 1.04335500  | 2.24772800  | 2.68806000  |
| C | -0.13152300 | 1.61662800  | 3.16245800  |
| C | -1.35612900 | 2.12911600  | 2.67066000  |
| C | -0.21319700 | 3.45094100  | 0.91859300  |
| C | 1.00437000  | 3.15150800  | 1.58446300  |
| C | -1.39781400 | 3.03309200  | 1.56800500  |
| C | 3.49511800  | -2.47754700 | -0.11028500 |

|    |             |             |             |
|----|-------------|-------------|-------------|
| C  | 2.52606400  | -2.72495800 | 1.03878300  |
| C  | 4.29051900  | -1.11069700 | -0.03645000 |
| C  | 2.48131300  | -1.97469100 | 2.17424200  |
| C  | 1.23377300  | -1.81147100 | 2.88837300  |
| C  | 0.06012400  | -2.50631200 | 2.51039300  |
| C  | -1.16848300 | -1.92254900 | 2.89941500  |
| C  | -0.06539100 | 0.19722300  | 3.53889300  |
| C  | 1.17060300  | -0.48119400 | 3.39465700  |
| C  | -1.23071000 | -0.59233200 | 3.40827700  |
| C  | 0.10145100  | -3.29948600 | 1.28601900  |
| C  | 1.31645600  | -3.33168800 | 0.55251300  |
| C  | -1.08668300 | -3.46072400 | 0.53759000  |
| C  | -3.22709300 | -1.00289300 | 2.23126900  |
| C  | -2.39224500 | -2.18134100 | 2.16442900  |
| C  | -2.35267300 | -2.93517400 | 1.00981300  |
| C  | -3.98441300 | -0.62001900 | 1.13272400  |
| C  | -3.35238100 | 1.72449600  | 1.49660200  |
| C  | -2.55874800 | 1.31639800  | 2.63209700  |
| C  | -2.49448800 | -0.01337300 | 2.98977800  |
| C  | -4.05001600 | 0.77828800  | 0.75419600  |
| C  | -3.34114500 | 1.86962700  | -1.32679000 |
| C  | -2.61720500 | 2.84787800  | -0.54899000 |
| C  | -2.62092200 | 2.77606200  | 0.82866300  |
| C  | -4.04558900 | 0.85217700  | -0.69144700 |
| C  | -3.21140000 | -0.77019000 | -2.33730100 |
| C  | -2.47544100 | 0.29142700  | -2.98598600 |
| C  | -2.54120100 | 1.57894800  | -2.49305600 |
| C  | -3.97567300 | -0.49958400 | -1.20992000 |
| C  | -3.14424100 | -2.54544900 | -0.13681200 |
| C  | -2.34458400 | -2.81820400 | -1.31183900 |
| C  | -2.37747100 | -1.95029900 | -2.38414000 |
| C  | -3.94184300 | -1.41173100 | -0.08224700 |
| Li | 1.29924200  | 1.14893000  | -0.53439000 |
| H  | 4.23252000  | -3.28771300 | -0.15323500 |
| H  | 5.35964100  | -1.34823200 | -0.04917500 |

$Li@C_{70}^{6-5}ts$

|    |             |             |            |
|----|-------------|-------------|------------|
| 11 |             |             |            |
| C  | 2.49435000  | 1.97090100  | 2.28033000 |
| C  | 1.23879200  | 2.09370800  | 2.98206700 |
| C  | 2.75971600  | 2.76330300  | 1.16975800 |
| C  | 0.29150900  | 2.99092500  | 2.54456100 |
| C  | -1.11386900 | 2.61556400  | 2.53602400 |
| C  | -1.55358800 | 1.37684600  | 3.06314500 |
| C  | -2.77335700 | 0.87808000  | 2.54659500 |
| C  | 3.70707700  | 0.80915700  | 0.03514600 |
| C  | 3.47230400  | 0.01160200  | 1.20508300 |
| C  | 3.37137400  | 2.16358700  | 0.01185800 |
| C  | 2.85043100  | 0.57424400  | 2.28835700 |
| C  | 1.81223100  | -0.15477700 | 3.02437100 |
| C  | 1.45646100  | -1.47807900 | 2.65747600 |
| C  | 0.15617800  | -1.89419600 | 3.02619400 |
| C  | -0.54623400 | 0.41849700  | 3.53557900 |

|   |             |             |             |
|---|-------------|-------------|-------------|
| C | 0.83250200  | 0.77211400  | 3.43685700  |
| C | -0.83700300 | -0.95407600 | 3.46149000  |
| C | 2.52634600  | 1.93898300  | -2.27404100 |
| C | 2.88272700  | 0.54104600  | -2.24892800 |
| C | 2.77338000  | 2.75023700  | -1.17386500 |
| C | 3.43830800  | -0.01708100 | -1.11713900 |
| C | 3.18084600  | -1.39464600 | -0.71124200 |
| C | 2.14257800  | -2.12156900 | -1.40011600 |
| C | 1.43163100  | -3.11569700 | -0.69095300 |
| C | 2.09784400  | -2.09598700 | 1.50428700  |
| C | 3.28062200  | -1.44688000 | 0.82650200  |
| C | 1.39490000  | -3.04679800 | 0.78180800  |
| C | 0.57190200  | 3.79919400  | -1.44178200 |
| C | 0.32367100  | 2.95906100  | -2.58635300 |
| C | 1.77293800  | 3.69840500  | -0.74490500 |
| C | 1.27967700  | 2.04916000  | -2.99545300 |
| C | 0.87655200  | 0.72587900  | -3.42627100 |
| C | -0.49088200 | 0.35923800  | -3.52854900 |
| C | -0.78285300 | -1.02028300 | -3.43561700 |
| C | 1.50730700  | -1.52523200 | -2.58821000 |
| C | 1.85240200  | -0.19569700 | -2.95263900 |
| C | 0.20467900  | -1.95589400 | -2.96950500 |
| C | 0.55593900  | 3.81530200  | 1.38412600  |
| C | -0.68694900 | 3.91594800  | 0.65318800  |
| C | 1.76213200  | 3.70954900  | 0.70775200  |
| C | -0.67941300 | 3.90837300  | -0.72477400 |
| C | -1.69498900 | 3.16046200  | -1.44527100 |
| C | -2.76044600 | 2.51477200  | -0.77118000 |
| C | -3.35409500 | 1.42027000  | -1.44260000 |
| C | -1.50965000 | 1.32521300  | -3.09479800 |
| C | -1.07828700 | 2.57503700  | -2.58675800 |
| C | -2.73503000 | 0.83095400  | -2.58518600 |
| C | -2.76986300 | 2.52669500  | 0.69799000  |
| C | -1.71046000 | 3.18025000  | 1.37605200  |
| C | -3.37037200 | 1.44398600  | 1.37952100  |
| C | -3.85640700 | -0.88035300 | -1.42799500 |
| C | -4.04027100 | 0.36770100  | -0.71688700 |
| C | -4.04780800 | 0.37975200  | 0.66152600  |
| C | -3.68430400 | -2.06981300 | -0.72707500 |
| C | -1.89391400 | -2.73695800 | -2.27358200 |
| C | -2.07667000 | -1.49548300 | -2.99534000 |
| C | -3.03612100 | -0.58828400 | -2.57790400 |
| C | -2.68165600 | -3.01823700 | -1.15815400 |
| C | -0.69269800 | -3.84407600 | 0.04242400  |
| C | 0.12934400  | -3.56646000 | -1.12659000 |
| C | -0.47373900 | -3.02377600 | -2.26491700 |
| C | -2.06063300 | -3.58036900 | 0.02801700  |
| C | -1.93482000 | -2.68818600 | 2.31499300  |
| C | -0.51239600 | -2.95280000 | 2.32088600  |
| C | 0.09304200  | -3.51295600 | 1.20863300  |
| C | -2.69565800 | -2.99332400 | 1.19397700  |
| C | -3.87655100 | -0.85423800 | 1.39887800  |
| C | -3.07572200 | -0.53920300 | 2.56276100  |
| C | -2.12979900 | -1.43715900 | 3.01375400  |
| C | -3.69629800 | -2.05420900 | 0.72596200  |

|    |             |             |             |
|----|-------------|-------------|-------------|
| N  | 5.49059200  | -2.81445900 | -0.68387200 |
| H  | 4.52279400  | -2.22307200 | -0.92679800 |
| H  | 6.24355100  | -2.30504400 | -1.15033600 |
| H  | 5.37406800  | -3.72461700 | -1.13355000 |
| B  | 5.61356900  | -2.87372800 | 0.82553400  |
| H  | 6.30753700  | -2.05441300 | 1.33040800  |
| H  | 4.22411100  | -2.04240800 | 1.15604300  |
| H  | 5.21432500  | -3.86163100 | 1.34804400  |
| Li | -0.01390500 | -1.40208800 | -0.75482300 |

$Li@C_{70}^{6-5}ts2$

1 1

|   |             |             |             |
|---|-------------|-------------|-------------|
| C | -3.12141000 | -2.02805300 | 0.53472600  |
| C | -2.47118000 | -2.60042000 | -0.62225300 |
| C | -3.72920300 | -0.77778100 | 0.42837400  |
| C | -2.47376000 | -1.91760500 | -1.81787900 |
| C | -1.30567200 | -1.90513000 | -2.65663000 |
| C | -0.14348100 | -2.64139700 | -2.31146000 |
| C | 1.07737300  | -2.16336200 | -2.83307400 |
| C | -2.78341500 | -0.11902500 | 2.60802000  |
| C | -2.11775000 | -1.40632200 | 2.68521700  |
| C | -3.56683400 | 0.20128100  | 1.48049500  |
| C | -2.27885200 | -2.33146300 | 1.66708400  |
| C | -1.14998200 | -3.12349800 | 1.21734300  |
| C | 0.11888400  | -3.02620000 | 1.84353300  |
| C | 1.23602500  | -3.36587400 | 1.04623500  |
| C | -0.12345200 | -3.35641000 | -1.02778200 |
| C | -1.26691400 | -3.28681700 | -0.19352400 |
| C | 1.11709300  | -3.52816400 | -0.36684000 |
| C | -2.60431400 | 2.42558400  | 1.37608300  |
| C | -1.76567100 | 2.09450800  | 2.50776300  |
| C | -3.51132200 | 1.50561700  | 0.88423700  |
| C | -1.87411400 | 0.85744400  | 3.14495400  |
| C | -0.65331900 | 0.17468800  | 3.56372200  |
| C | 0.62176900  | 0.80092500  | 3.45826000  |
| C | 1.73742700  | -0.06715300 | 3.36459700  |
| C | 0.29896400  | -2.03614400 | 2.91471900  |
| C | -0.81068300 | -1.22220900 | 3.28469900  |
| C | 1.57716400  | -1.46566000 | 3.10069100  |
| C | -2.86305900 | 2.14331200  | -1.43602000 |
| C | -1.92411000 | 3.05200700  | -0.87180900 |
| C | -3.91903300 | 1.45034400  | -0.59529100 |
| C | -1.81188400 | 3.27911200  | 0.49248200  |
| C | -0.50791600 | 3.42440700  | 1.07625700  |
| C | 0.67907200  | 3.54751400  | 0.29551100  |
| C | 1.88750500  | 3.18074800  | 0.92088600  |
| C | 0.71221300  | 2.12793000  | 2.82702900  |
| C | -0.47927200 | 2.71972000  | 2.32443500  |
| C | 1.91257100  | 2.48730800  | 2.17583400  |
| C | -3.13687900 | -0.62977300 | -1.92582500 |
| C | -2.38475900 | 0.16654900  | -2.84955900 |
| C | -3.87300500 | -0.09250400 | -0.85434500 |
| C | -2.21109900 | 1.51879200  | -2.50552200 |



|    |             |             |             |
|----|-------------|-------------|-------------|
| C  | -0.88921100 | 2.13101600  | -2.71267200 |
| C  | 0.19964700  | 1.41153000  | -3.24821100 |
| C  | 1.48553300  | 1.89058100  | -2.90275500 |
| C  | 0.55943700  | 3.37482000  | -1.15406400 |
| C  | -0.71569800 | 3.09216400  | -1.69671800 |
| C  | 1.66277500  | 2.85655200  | -1.86993300 |
| C  | 0.03055600  | -0.02170800 | -3.52957800 |
| C  | -1.23249600 | -0.60849500 | -3.25574300 |
| C  | 1.15756200  | -0.86351500 | -3.42390500 |
| C  | 3.55036900  | 1.45161900  | -1.86368700 |
| C  | 2.64427700  | 1.01520400  | -2.90199200 |
| C  | 2.48219700  | -0.33001300 | -3.15534600 |
| C  | 4.25785500  | 0.51907800  | -1.11570600 |
| C  | 3.77889400  | 1.77925500  | 0.93407600  |
| C  | 3.04006100  | 2.74367800  | 0.15085200  |
| C  | 2.92981200  | 2.58394100  | -1.21449700 |
| C  | 4.37577800  | 0.68728200  | 0.31810400  |
| C  | 3.60624600  | -0.77782000 | 2.13425200  |
| C  | 2.98430900  | 0.36257000  | 2.76758100  |
| C  | 3.06300400  | 1.61062700  | 2.17977700  |
| C  | 4.28824100  | -0.62742900 | 0.93213900  |
| C  | 3.26728300  | -2.68862000 | 0.07582900  |
| C  | 2.55841800  | -2.83665300 | 1.32473300  |
| C  | 2.72565900  | -1.90484500 | 2.33048400  |
| C  | 4.11605600  | -1.60385900 | -0.11854900 |
| C  | 3.22440500  | -1.30622300 | -2.38903200 |
| C  | 2.34000400  | -2.43187500 | -2.17403200 |
| C  | 2.36710100  | -3.11057700 | -0.97319700 |
| C  | 4.09155400  | -0.89589200 | -1.38674000 |
| Li | -0.91136300 | 0.17198900  | 1.32957700  |
| N  | -6.59513700 | -0.53161800 | -0.93212300 |
| H  | -5.46977600 | -0.31344500 | -1.07569900 |
| H  | -7.08185000 | 0.33190100  | -1.18680500 |
| H  | -6.81701000 | -1.26427800 | -1.61134100 |
| B  | -6.72851100 | -0.93609900 | 0.51857100  |
| H  | -6.64161400 | -2.08710500 | 0.76743800  |
| H  | -6.89786900 | -0.05872200 | 1.29279800  |
| H  | -4.92934700 | 1.86220600  | -0.74415200 |

$Li@C_{70}^{6-5}$

|    |             |             |             |
|----|-------------|-------------|-------------|
| 11 |             |             |             |
| C  | -3.12523200 | -2.34277000 | 0.71651300  |
| C  | -2.37587700 | -2.99626700 | -0.36934600 |
| C  | -3.90578000 | -1.23588300 | 0.47241100  |
| C  | -2.44640900 | -2.49218400 | -1.63792300 |
| C  | -1.23871000 | -2.42843900 | -2.43766000 |
| C  | -0.00579200 | -2.97093100 | -1.98973800 |
| C  | 1.16069000  | -2.39809200 | -2.53814000 |
| C  | -3.05047800 | -0.21693700 | 2.54044300  |
| C  | -2.26413700 | -1.38688500 | 2.79740000  |
| C  | -3.84998100 | -0.13578800 | 1.38631300  |
| C  | -2.28922100 | -2.41856100 | 1.88061800  |
| C  | -1.05981200 | -3.11836000 | 1.53832900  |

|   |             |             |             |
|---|-------------|-------------|-------------|
| C | 0.16392400  | -2.80844500 | 2.17759100  |
| C | 1.33746600  | -3.11112500 | 1.44703300  |
| C | 0.05866900  | -3.52078500 | -0.63250800 |
| C | -1.11532600 | -3.47518200 | 0.16273400  |
| C | 1.28640400  | -3.46139400 | 0.06489100  |
| C | -3.15315800 | 2.16126500  | 1.05948600  |
| C | -2.31681400 | 2.07405900  | 2.22421600  |
| C | -3.91853100 | 1.08961600  | 0.64766800  |
| C | -2.27408000 | 0.91356600  | 2.96900300  |
| C | -1.01006300 | 0.43991800  | 3.49944500  |
| C | 0.17825300  | 1.19478500  | 3.35629900  |
| C | 1.38814900  | 0.46413600  | 3.38361300  |
| C | 0.19458900  | -1.69110900 | 3.13444900  |
| C | -1.00177200 | -0.98089100 | 3.39004900  |
| C | 1.39587200  | -0.95769000 | 3.27356200  |
| C | -3.28961800 | 1.53804800  | -1.70076900 |
| C | -2.49449200 | 2.68276700  | -1.25932100 |
| C | -4.29970700 | 0.83619300  | -0.81520200 |
| C | -2.41253300 | 2.98111800  | 0.08414000  |
| C | -1.15676300 | 3.39004700  | 0.68024100  |
| C | 0.01862400  | 3.56753500  | -0.09943500 |
| C | 1.24985100  | 3.41628500  | 0.58240900  |
| C | 0.13365000  | 2.43981300  | 2.57470200  |
| C | -1.09400000 | 2.82789300  | 1.99019100  |
| C | 1.30493500  | 2.86086200  | 1.89470200  |
| C | -3.25974700 | -1.30976200 | -1.90986500 |
| C | -2.54887500 | -0.53909400 | -2.79388400 |
| C | -4.28229300 | -0.76783600 | -0.93700200 |
| C | -2.55815100 | 0.90098300  | -2.68135000 |
| C | -1.31054700 | 1.63463600  | -2.94394000 |
| C | -0.12178900 | 0.98092100  | -3.36043200 |
| C | 1.08933400  | 1.64184700  | -3.06250900 |
| C | -0.04124300 | 3.22671800  | -1.52345100 |
| C | -1.27614400 | 2.74557200  | -2.05643800 |
| C | 1.12986600  | 2.74502000  | -2.14765000 |
| C | -0.11454800 | -0.49526500 | -3.47509800 |
| C | -1.28974400 | -1.20856800 | -3.15162500 |
| C | 1.10623200  | -1.17447900 | -3.27466900 |
| C | 3.16220600  | 1.57778300  | -1.95921400 |
| C | 2.34185700  | 0.91923100  | -2.94842300 |
| C | 2.34768200  | -0.45704500 | -3.04747500 |
| C | 3.95508500  | 0.82667300  | -1.09865800 |
| C | 3.28576500  | 2.25192800  | 0.78575800  |
| C | 2.46147700  | 3.02818300  | -0.11501900 |
| C | 2.40446300  | 2.69950600  | -1.45417600 |
| C | 4.01662700  | 1.17310000  | 0.30644000  |
| C | 3.36451800  | -0.15706500 | 2.26528700  |
| C | 2.59293000  | 0.96743500  | 2.74868000  |
| C | 2.56009800  | 2.14390600  | 2.03080400  |
| C | 4.05788000  | -0.06310600 | 1.06785700  |
| C | 3.30844000  | -2.31464100 | 0.44131800  |
| C | 2.58196300  | -2.40191400 | 1.68775300  |
| C | 2.60786300  | -1.34905800 | 2.57681700  |
| C | 4.03209400  | -1.17099900 | 0.13155100  |
| C | 3.17995100  | -1.24503400 | -2.16913300 |

|    |             |             |             |
|----|-------------|-------------|-------------|
| C  | 2.43423200  | -2.43905200 | -1.83961000 |
| C  | 2.49566600  | -2.96190600 | -0.56556600 |
| C  | 3.96350700  | -0.61939000 | -1.20684500 |
| H  | -5.28979600 | -1.10249500 | -1.20771900 |
| H  | -5.31516900 | 1.18894700  | -1.02452900 |
| Li | -1.26390500 | 0.93234900  | -0.79320100 |

**Li@C<sub>36</sub>**

|     |             |             |             |
|-----|-------------|-------------|-------------|
| 1 1 |             |             |             |
| C   | 0.71728500  | -2.13245900 | -1.25591700 |
| C   | 1.41348300  | -1.14609100 | -2.02548000 |
| C   | 0.71812400  | 0.02127700  | -2.47316100 |
| C   | 1.41549700  | 1.18100200  | -2.00375300 |
| C   | 0.72045300  | 2.15420600  | -1.21811400 |
| C   | 1.41804800  | 2.32739100  | 0.02127200  |
| C   | 0.72046800  | 2.13161800  | 1.25565700  |
| C   | 1.41580700  | 1.14456800  | 2.02555400  |
| C   | 0.71846900  | -0.02308600 | 2.47200900  |
| C   | 1.41432100  | -1.18278700 | 2.00322000  |
| C   | 0.71802200  | -2.15610000 | 1.21741500  |
| C   | 1.41460500  | -2.32818400 | -0.02135600 |
| C   | -0.72861800 | -2.13242200 | -1.25650300 |
| C   | -1.42202300 | -2.26637700 | -0.01945100 |
| C   | -0.72871400 | -2.15567100 | 1.21863200  |
| C   | -1.42063800 | -1.15033600 | 1.95325800  |
| C   | -0.72736100 | -0.02223300 | 2.47478200  |
| C   | -1.41889400 | 1.11745200  | 1.97379600  |
| C   | -0.72587100 | 2.13276300  | 1.25641100  |
| C   | -1.41923300 | 2.26791900  | 0.01989800  |
| C   | -0.72613100 | 2.15533500  | -1.21835600 |
| C   | -1.41979200 | 1.15163600  | -1.95326900 |
| C   | -0.72756100 | 0.02247500  | -2.47450800 |
| C   | -1.42067200 | -1.11622200 | -1.97329300 |
| C   | -2.64376500 | -0.68859500 | -1.21940900 |
| C   | -2.64500100 | -1.39958100 | -0.01222000 |
| C   | -2.64409500 | -0.70960600 | 1.20730500  |
| C   | -2.64256200 | 0.69147600  | 1.21980000  |
| C   | -2.64289900 | 1.40229000  | 0.01273100  |
| C   | -2.64323200 | 0.71229600  | -1.20701700 |
| C   | 2.58760600  | -0.69833800 | -1.23322700 |
| C   | 2.58868300  | 0.71793300  | -1.22009600 |
| C   | 2.59002100  | 1.41538200  | 0.01325200  |
| C   | 2.58876500  | 0.69589000  | 1.23334100  |
| C   | 2.58791400  | -0.72063800 | 1.21971400  |
| C   | 2.58827600  | -1.41749900 | -0.01351900 |
| Li  | 0.82242200  | 0.00663200  | 0.00120200  |

**Li@C<sub>36</sub><sup>AB</sup>**

|     |             |            |             |
|-----|-------------|------------|-------------|
| 1 1 |             |            |             |
| C   | -0.82560000 | 1.18380800 | -2.29557000 |
| C   | -1.16578900 | 2.28042600 | -1.43100900 |
| C   | -2.06862600 | 2.06444400 | -0.34360100 |

|    |             |             |             |
|----|-------------|-------------|-------------|
| C  | -1.42839000 | 2.46791100  | 0.87316800  |
| C  | -1.30830200 | 1.52822800  | 1.95189900  |
| C  | 0.06927900  | 1.40629700  | 2.30335100  |
| C  | 0.69224500  | 0.11074500  | 2.29416200  |
| C  | 1.82278900  | 0.15890300  | 1.42757500  |
| C  | 1.93242900  | -0.76885200 | 0.34280100  |
| C  | 2.08104800  | -0.02685900 | -0.86910700 |
| C  | 1.17453100  | -0.23421500 | -1.94979100 |
| C  | 0.59158500  | 1.03090600  | -2.30018400 |
| C  | -1.66108700 | 0.00368200  | -2.29558600 |
| C  | -1.04763500 | -1.27849600 | -2.25045500 |
| C  | 0.33932700  | -1.41296300 | -1.95266500 |
| C  | 0.41142000  | -2.30983100 | -0.85014200 |
| C  | 1.09832600  | -1.94666800 | 0.34330300  |
| C  | 0.15707600  | -2.12821600 | 1.39680600  |
| C  | -0.14321900 | -1.06871100 | 2.29633200  |
| C  | -1.56020800 | -0.91413200 | 2.25368400  |
| C  | -2.14338300 | 0.34715100  | 1.95197600  |
| C  | -3.02491900 | 0.11982300  | 0.85448300  |
| C  | -2.90274100 | 0.88289200  | -0.34290700 |
| C  | -2.76887100 | -0.06168200 | -1.39904500 |
| C  | -2.91111500 | -1.45001400 | -0.86099100 |
| C  | -1.85195800 | -2.20215800 | -1.38587300 |
| C  | -0.95125500 | -2.84161200 | -0.52392000 |
| C  | -1.10914000 | -2.72877600 | 0.86370200  |
| C  | -2.16765900 | -1.97704100 | 1.39040300  |
| C  | -3.07015600 | -1.33711700 | 0.52845700  |
| C  | 0.09392400  | 2.82688900  | -0.87203700 |
| C  | -0.06670900 | 2.94067400  | 0.53155200  |
| C  | 0.84774900  | 2.29380600  | 1.40174200  |
| C  | 1.91760200  | 1.53776000  | 0.86979400  |
| C  | 2.07655400  | 1.42422800  | -0.53045200 |
| C  | 1.16706200  | 2.06668100  | -1.40064200 |
| Li | -0.02860200 | 0.72891100  | 0.00372800  |
| B  | 4.99403100  | -0.70222400 | -0.05929100 |
| H  | 4.74135500  | -0.55738400 | -1.23702500 |
| H  | 4.71407400  | 0.27023900  | 0.60916100  |
| H  | 4.54166300  | -1.73399200 | 0.39099900  |
| N  | 6.62354200  | -0.84832200 | 0.03330800  |
| H  | 7.09082000  | -0.01698400 | -0.32927600 |
| H  | 6.93093500  | -0.97851700 | 0.99738300  |
| H  | 6.95490900  | -1.64820000 | -0.50639200 |

$Li@C_{36}^{6-6}ts1$

|    |             |            |             |
|----|-------------|------------|-------------|
| 11 |             |            |             |
| C  | 0.61073700  | 0.68948800 | -2.25615600 |
| C  | -0.59084800 | 1.43113400 | -2.30544200 |
| C  | -1.85621800 | 0.79347000 | -1.99219000 |
| C  | -2.47207000 | 1.51635700 | -0.94028000 |
| C  | -2.86513800 | 0.84319400 | 0.26544000  |
| C  | -2.22432800 | 1.50323000 | 1.37116500  |
| C  | -1.40173400 | 0.76933300 | 2.25858200  |
| C  | -0.09540300 | 1.40541700 | 2.30453700  |

|    |             |             |             |
|----|-------------|-------------|-------------|
| C  | 1.06630300  | 0.66630300  | 1.99075800  |
| C  | 1.80708300  | 1.35010500  | 0.94527600  |
| C  | 2.07555900  | 0.63706900  | -0.26708200 |
| C  | 1.54920400  | 1.35877400  | -1.37485800 |
| C  | 0.55521300  | -0.75620600 | -2.21875900 |
| C  | 1.37955800  | -1.48720700 | -1.34047800 |
| C  | 2.15270400  | -0.84860600 | -0.28170400 |
| C  | 1.61564400  | -1.50028500 | 0.91020000  |
| C  | 0.99903400  | -0.77966800 | 1.94923300  |
| C  | -0.25291300 | -1.42924300 | 2.20913600  |
| C  | -1.47233100 | -0.67022700 | 2.24706600  |
| C  | -2.33119000 | -1.31732900 | 1.32889900  |
| C  | -2.94813100 | -0.58992400 | 0.26577000  |
| C  | -2.56818600 | -1.30497400 | -0.91225500 |
| C  | -1.92305500 | -0.64613300 | -1.98440400 |
| C  | -0.72372400 | -1.40468600 | -2.21521100 |
| C  | -0.68803000 | -2.62407200 | -1.40300900 |
| C  | 0.59088900  | -2.65605900 | -0.82579100 |
| C  | 0.73808900  | -2.66543100 | 0.56159300  |
| C  | -0.39078300 | -2.64151800 | 1.39545200  |
| C  | -1.68350000 | -2.57782500 | 0.81338200  |
| C  | -1.83077000 | -2.57108900 | -0.56207400 |
| C  | -0.43510800 | 2.60098400  | -1.40620900 |
| C  | -1.57236300 | 2.64884600  | -0.57225900 |
| C  | -1.42143600 | 2.64051500  | 0.83473700  |
| C  | -0.13296600 | 2.58419300  | 1.40811400  |
| C  | 1.02184500  | 2.54251300  | 0.57588500  |
| C  | 0.86783100  | 2.54946300  | -0.83594600 |
| N  | 5.16361500  | 0.54013900  | 0.00629000  |
| H  | 4.48311900  | 1.09877800  | 0.53201400  |
| H  | 5.19814500  | 0.90684800  | -0.94764000 |
| H  | 6.08303000  | 0.70574500  | 0.42522700  |
| B  | 4.83527000  | -1.03546500 | 0.05391000  |
| H  | 3.63919300  | -1.12124200 | -0.44792800 |
| H  | 5.55830400  | -1.62609200 | -0.69187800 |
| H  | 4.71980100  | -1.38149900 | 1.19558800  |
| Li | -0.30001800 | 0.81812300  | -0.00855600 |

$Li@C_{36}^{6-}ts2$

|    |             |             |             |
|----|-------------|-------------|-------------|
| 11 |             |             |             |
| C  | 0.91125100  | 0.42385400  | -2.15844600 |
| C  | -0.07048700 | 1.40956100  | -2.32462400 |
| C  | -1.49324900 | 1.08246700  | -2.10938300 |
| C  | -1.99203500 | 1.94753300  | -1.11963700 |
| C  | -2.65710900 | 1.42728900  | 0.05164900  |
| C  | -1.95138700 | 1.92537100  | 1.20952000  |
| C  | -1.41903700 | 1.04159500  | 2.16471500  |
| C  | 0.01049700  | 1.36541100  | 2.33755200  |
| C  | 0.98579300  | 0.38324000  | 2.11714700  |
| C  | 1.95014000  | 0.87237000  | 1.12646200  |
| C  | 2.31933400  | 0.07632900  | -0.04756200 |
| C  | 1.90910400  | 0.89449900  | -1.19115100 |
| C  | 0.53652500  | -0.97184600 | -2.08629200 |

|    |             |             |             |
|----|-------------|-------------|-------------|
| C  | 1.10648400  | -1.83923600 | -1.17938500 |
| C  | 2.08016300  | -1.45896300 | -0.05738700 |
| C  | 1.14528100  | -1.86055400 | 1.08932700  |
| C  | 0.60797300  | -1.01106700 | 2.03229500  |
| C  | -0.80999200 | -1.38153300 | 2.19506400  |
| C  | -1.82654000 | -0.33315500 | 2.12859700  |
| C  | -2.74502900 | -0.76517200 | 1.15957500  |
| C  | -3.09751500 | 0.07190400  | 0.04643300  |
| C  | -2.78418300 | -0.74363600 | -1.09370100 |
| C  | -1.89947700 | -0.29281000 | -2.08538800 |
| C  | -0.88630100 | -1.33939300 | -2.20683500 |
| C  | -1.18506900 | -2.48114900 | -1.44437200 |
| C  | 0.02440500  | -2.74732600 | -0.72655900 |
| C  | 0.04831600  | -2.76035500 | 0.65707200  |
| C  | -1.13533300 | -2.50876400 | 1.42171500  |
| C  | -2.34421200 | -2.13951700 | 0.69368500  |
| C  | -2.36780600 | -2.12660300 | -0.66813800 |
| C  | 0.27505300  | 2.52541800  | -1.42179300 |
| C  | -0.86522000 | 2.82533300  | -0.68295000 |
| C  | -0.84050500 | 2.81151300  | 0.75172200  |
| C  | 0.32475700  | 2.49776600  | 1.44527600  |
| C  | 1.52492900  | 2.16444400  | 0.70174700  |
| C  | 1.50020000  | 2.17862300  | -0.72750600 |
| N  | 5.05500000  | 0.16261500  | -0.06232000 |
| H  | 5.25108000  | 0.79240600  | 0.71756900  |
| H  | 5.27965500  | 0.61459300  | -0.94992400 |
| B  | 5.48386100  | -1.23398200 | 0.09842400  |
| H  | 5.65092700  | -1.87351000 | -0.88467300 |
| H  | 5.56303700  | -1.65357800 | 1.20347900  |
| Li | -0.21257900 | 0.67439300  | 0.00400700  |
| H  | 3.02703900  | -2.02423400 | -0.07949800 |
| H  | 3.72339500  | 0.17213100  | -0.06551000 |

$Li@C_{36}^{6-61}$

1 1

|   |             |             |             |
|---|-------------|-------------|-------------|
| C | 0.39791800  | 0.18921000  | -2.44324500 |
| C | -0.02694600 | 1.49691500  | -2.25338800 |
| C | -1.36001100 | 1.78136000  | -1.68569200 |
| C | -1.15924000 | 2.61185700  | -0.56710100 |
| C | -1.70246800 | 2.25625600  | 0.72634500  |
| C | -0.56383600 | 2.22201100  | 1.62477700  |
| C | -0.26823700 | 1.06078700  | 2.35569100  |
| C | 1.13553200  | 0.72089800  | 2.06916800  |
| C | 1.50153700  | -0.51274000 | 1.57083900  |
| C | 2.55106000  | -0.39521500 | 0.45680400  |
| C | 1.88862500  | -0.95776300 | -0.81282900 |
| C | 1.68190100  | 0.03400700  | -1.72446900 |
| C | -0.52367600 | -0.91942300 | -2.33621000 |
| C | -0.18065500 | -2.06939200 | -1.65929700 |
| C | 1.10976900  | -2.27967700 | -0.84468200 |
| C | 0.41116800  | -2.45475300 | 0.50810000  |
| C | 0.55359500  | -1.60161400 | 1.57814100  |
| C | -0.79759800 | -1.37042300 | 2.13778800  |

|    |             |             |             |
|----|-------------|-------------|-------------|
| C  | -1.23816900 | 0.00444100  | 2.40409700  |
| C  | -2.46295500 | 0.14740100  | 1.74729100  |
| C  | -2.66807300 | 1.21978300  | 0.80355000  |
| C  | -3.03926000 | 0.53232800  | -0.40445000 |
| C  | -2.31714000 | 0.71567500  | -1.58910000 |
| C  | -1.93925600 | -0.63261200 | -2.03706500 |
| C  | -2.50469100 | -1.64065300 | -1.25176600 |
| C  | -1.39860800 | -2.50407500 | -0.93050200 |
| C  | -1.03995600 | -2.73609800 | 0.38018800  |
| C  | -1.76177200 | -2.12209900 | 1.46423000  |
| C  | -2.83010400 | -1.17914400 | 1.13815900  |
| C  | -3.17679700 | -0.94739300 | -0.15654200 |
| C  | 0.98352100  | 2.24217400  | -1.46246300 |
| C  | 0.29621900  | 2.90984800  | -0.43233000 |
| C  | 0.66239400  | 2.67358400  | 0.90938100  |
| C  | 1.70874600  | 1.77015900  | 1.20041800  |
| C  | 2.44797900  | 1.12171400  | 0.18077600  |
| C  | 2.04027700  | 1.35276100  | -1.13870000 |
| N  | 5.08482100  | -0.69938400 | -0.24707500 |
| H  | 5.24084600  | 0.30914100  | -0.31289800 |
| H  | 5.98160100  | -1.12678100 | -0.00569500 |
| B  | 3.98880200  | -1.07916600 | 0.90037900  |
| H  | 3.89731500  | -2.28113100 | 0.90720600  |
| H  | 4.39353100  | -0.59884600 | 1.92494500  |
| Li | -0.02885100 | 0.56845300  | -0.03539700 |
| H  | 1.73873000  | -3.12169300 | -1.15587100 |
| H  | 4.83201600  | -1.03510500 | -1.17933300 |

$Li@C_{36}^{6-6}$

1 1

|   |             |             |             |
|---|-------------|-------------|-------------|
| C | 0.43285400  | -2.63213500 | 0.00044200  |
| C | 1.16284800  | -2.18779700 | -1.16997700 |
| C | 0.54691600  | -1.38949700 | -2.15167900 |
| C | 1.39333200  | -0.19498000 | -2.35944500 |
| C | 0.85055300  | 1.08062800  | -2.14606300 |
| C | 1.66711200  | 1.81535500  | -1.17283100 |
| C | 1.10894000  | 2.64644800  | -0.00033800 |
| C | 1.66693000  | 1.81576500  | 1.17249700  |
| C | 0.85013400  | 1.08138200  | 2.14577200  |
| C | 1.39283800  | -0.19417000 | 2.35960000  |
| C | 0.54649500  | -1.38876300 | 2.15212900  |
| C | 1.16265200  | -2.18742700 | 1.17086700  |
| C | -0.98408700 | -2.53875300 | 0.00032200  |
| C | -1.62314100 | -1.91236500 | 1.12920500  |
| C | -0.87833900 | -1.24833300 | 2.11724000  |
| C | -1.46574600 | 0.09116900  | 2.21066900  |
| C | -0.57721200 | 1.26057900  | 2.05778500  |
| C | -1.15622300 | 2.09458600  | 1.12299100  |
| C | -0.45692600 | 2.86315700  | -0.00051300 |
| C | -1.15594600 | 2.09404100  | -1.12367800 |
| C | -0.57677900 | 1.25981000  | -2.05824300 |
| C | -1.46528900 | 0.09039900  | -2.21080800 |

|    |             |             |             |
|----|-------------|-------------|-------------|
| C  | -0.87790900 | -1.24912600 | -2.11704000 |
| C  | -1.62286600 | -1.91278100 | -1.12884600 |
| C  | -2.73556300 | -1.01109200 | -0.68263300 |
| C  | -2.73582100 | -1.01095300 | 0.68258700  |
| C  | -2.62891300 | 0.23149300  | 1.44146000  |
| C  | -2.40646300 | 1.43471000  | 0.69231500  |
| C  | -2.40631500 | 1.43443000  | -0.69313100 |
| C  | -2.62868300 | 0.23101300  | -1.44196000 |
| C  | 2.38385400  | -1.46719500 | -0.72875600 |
| C  | 2.54633400  | -0.30824900 | -1.46128500 |
| C  | 2.66155000  | 0.96233800  | -0.73114500 |
| C  | 2.66146600  | 0.96259000  | 0.73127700  |
| C  | 2.54612500  | -0.30774700 | 1.46177800  |
| C  | 2.38371800  | -1.46691700 | 0.72959100  |
| Li | 0.53313000  | -0.20709600 | 0.00013100  |
| H  | -0.67837300 | 3.93403700  | -0.00080400 |
| H  | 1.58441500  | 3.63757200  | -0.00051200 |

$Li@C_{36}^{5-5}ts2$

|    |             |             |             |
|----|-------------|-------------|-------------|
| 11 |             |             |             |
| C  | -2.32195500 | -1.18398600 | -1.24228100 |
| C  | -1.19579700 | -1.67043900 | -2.01414600 |
| C  | -0.24802400 | -0.75030200 | -2.50166000 |
| C  | 1.04799000  | -1.17308900 | -1.97895700 |
| C  | 1.83561800  | -0.30421400 | -1.22302700 |
| C  | 2.39928300  | -0.96845400 | 0.00009000  |
| C  | 1.83558500  | -0.30421100 | 1.22321400  |
| C  | 1.04785100  | -1.17308600 | 1.97904600  |
| C  | -0.24820800 | -0.75031100 | 2.50166200  |
| C  | -1.19594100 | -1.67044200 | 2.01406400  |
| C  | -2.32205700 | -1.18399900 | 1.24212600  |
| C  | -2.32605000 | -1.89724500 | -0.00007800 |
| C  | -2.60170800 | 0.22296300  | -1.24148300 |
| C  | -2.85195200 | 0.86709100  | -0.00009200 |
| C  | -2.60181200 | 0.22294900  | 1.24131300  |
| C  | -1.76363900 | 1.12003900  | 2.01531700  |
| C  | -0.54529800 | 0.65859300  | 2.50875900  |
| C  | 0.46749900  | 1.57517600  | 1.96473000  |
| C  | 1.53339000  | 1.08961500  | 1.20723500  |
| C  | 1.83137400  | 1.91558900  | 0.00014100  |
| C  | 1.53341100  | 1.08960400  | -1.20701000 |
| C  | 0.46765000  | 1.57517700  | -1.96465400 |
| C  | -0.54509700 | 0.65860300  | -2.50877500 |
| C  | -1.76347100 | 1.12005400  | -2.01542100 |
| C  | -1.53886100 | 2.38337500  | -1.24903300 |
| C  | -2.16807200 | 2.18657000  | -0.00006200 |
| C  | -1.53897200 | 2.38335500  | 1.24894400  |
| C  | -0.16148400 | 2.60662900  | 1.21464700  |
| C  | 0.67764400  | 3.00523600  | 0.00002900  |
| C  | -0.16140800 | 2.60664500  | -1.21462800 |
| C  | -0.50193800 | -2.72234700 | -1.22288900 |
| C  | 0.87959000  | -2.41842400 | -1.21179400 |
| C  | 1.60829300  | -2.25981000 | 0.00006800  |



|    |             |             |             |
|----|-------------|-------------|-------------|
| C  | 0.87950100  | -2.41841400 | 1.21187400  |
| C  | -0.50202300 | -2.72234500 | 1.22286300  |
| C  | -1.19987100 | -2.85875100 | -0.00003600 |
| H  | 4.89313500  | 1.19534200  | -0.81357900 |
| H  | 4.89349000  | 1.19541600  | 0.81321000  |
| N  | 4.35313300  | 0.90394300  | -0.00005100 |
| B  | 4.17484300  | -0.66039800 | 0.00002100  |
| H  | 4.55297300  | -1.16091400 | 1.02661000  |
| H  | 4.55291900  | -1.16103100 | -1.02655100 |
| H  | 3.12399200  | 1.82713000  | -0.00009700 |
| Li | -0.27079000 | -0.70588200 | 0.00000300  |
| H  | 1.00344600  | 4.05174000  | 0.00007700  |

*Li@C*<sub>36</sub><sup>5-5</sup>1

1 1

|   |             |             |             |
|---|-------------|-------------|-------------|
| C | -1.97680600 | -1.70208300 | -1.23782600 |
| C | -0.75573800 | -1.86318300 | -1.99748500 |
| C | -0.07752600 | -0.72828500 | -2.47658300 |
| C | 1.28637800  | -0.80392600 | -1.95535700 |
| C | 1.85131600  | 0.22522700  | -1.22512900 |
| C | 2.60404900  | -0.31217000 | 0.00031100  |
| C | 1.85095200  | 0.22534300  | 1.22541600  |
| C | 1.28581100  | -0.80372300 | 1.95564300  |
| C | -0.07824500 | -0.72810000 | 2.47653200  |
| C | -0.75629800 | -1.86307700 | 1.99741100  |
| C | -1.97722700 | -1.70208400 | 1.23745200  |
| C | -1.78874600 | -2.39437400 | -0.00014700 |
| C | -2.62596600 | -0.41790900 | -1.22969200 |
| C | -3.05274600 | 0.12867400  | -0.00030000 |
| C | -2.62647000 | -0.41794800 | 1.22915600  |
| C | -2.02956200 | 0.66949600  | 1.99143400  |
| C | -0.72847000 | 0.55247500  | 2.47867900  |
| C | 0.00566300  | 1.71688900  | 1.95297000  |
| C | 1.22113300  | 1.53119800  | 1.20950100  |
| C | 1.12118300  | 2.26883400  | 0.00007200  |
| C | 1.22143800  | 1.53106600  | -1.20950600 |
| C | 0.00632500  | 1.71662500  | -1.95311000 |
| C | -0.72765000 | 0.55231400  | -2.47897400 |
| C | -2.02881900 | 0.66939500  | -1.99176400 |
| C | -2.12993400 | 1.94277000  | -1.23021800 |
| C | -2.71829900 | 1.61142700  | -0.00018900 |
| C | -2.13051400 | 1.94283900  | 1.22980900  |
| C | -0.86797900 | 2.55903500  | 1.23946600  |
| C | -0.17475700 | 3.11524600  | -0.00006400 |
| C | -0.86768100 | 2.55889200  | -1.23964100 |
| C | 0.18319500  | -2.72120500 | -1.21872200 |
| C | 1.43908900  | -2.07775200 | -1.20296700 |
| C | 2.10004200  | -1.76753500 | 0.00029500  |
| C | 1.43872800  | -2.07761000 | 1.20343200  |
| C | 0.18287800  | -2.72112300 | 1.21893600  |
| C | -0.45309400 | -3.04171600 | 0.00002800  |
| H | 5.62708700  | 1.54017200  | 0.00054900  |
| H | 4.26089900  | 1.93304400  | 0.82577900  |

|    |             |             |             |
|----|-------------|-------------|-------------|
| N  | 4.60950800  | 1.44004200  | 0.00027200  |
| B  | 4.25263000  | -0.15525200 | 0.00033600  |
| Li | -0.14653200 | -0.65016000 | 0.00062700  |
| H  | -0.02139400 | 4.20161900  | -0.00012300 |
| H  | 4.26137300  | 1.93283600  | -0.82556200 |
| H  | 4.71402600  | -0.60239800 | 1.01638400  |
| H  | 4.71397000  | -0.60247200 | -1.01570200 |

$Li@C_{36}^{5-5}$

1 1

|    |             |             |             |
|----|-------------|-------------|-------------|
| C  | -0.74697900 | 0.08707500  | -2.50690600 |
| C  | -1.66131700 | -0.92782700 | -2.04519800 |
| C  | -1.14493700 | -2.00619600 | -1.25420600 |
| C  | -1.87420500 | -2.06363700 | 0.00024700  |
| C  | -1.14497900 | -2.00587400 | 1.25471500  |
| C  | -1.66140600 | -0.92733300 | 2.04546400  |
| C  | -0.74705400 | 0.08774900  | 2.50684100  |
| C  | -1.19551800 | 1.35361600  | 2.02289500  |
| C  | -0.31635500 | 2.18370400  | 1.23769800  |
| C  | -0.97046300 | 2.50063100  | -0.00031800 |
| C  | -0.31634300 | 2.18337200  | -1.23832700 |
| C  | -1.19548000 | 1.35311800  | -2.02327600 |
| C  | 0.66408100  | -0.18131900 | -2.51673900 |
| C  | 1.56323900  | 0.83893700  | -1.96173400 |
| C  | 1.08908200  | 1.91572800  | -1.23428700 |
| C  | 1.96498200  | 2.20280500  | -0.00030200 |
| C  | 1.08909200  | 1.91610000  | 1.23382300  |
| C  | 1.56323100  | 0.83952500  | 1.96157500  |
| C  | 0.66402800  | -0.18065200 | 2.51678100  |
| C  | 1.13974700  | -1.39498200 | 2.02019400  |
| C  | 0.26656300  | -2.24522100 | 1.25178100  |
| C  | 0.92411800  | -2.47643600 | 0.00035700  |
| C  | 0.26659900  | -2.24556200 | -1.25121600 |
| C  | 1.13978400  | -1.39557300 | -2.01980900 |
| C  | 2.40571700  | -1.16190900 | -1.25256800 |
| C  | 2.61787100  | 0.20098500  | -1.21678400 |
| C  | 3.02103000  | 1.02202900  | -0.00011200 |
| C  | 2.61785300  | 0.20134700  | 1.21679600  |
| C  | 2.40569300  | -1.16153800 | 1.25291700  |
| C  | 2.21825000  | -1.80363100 | 0.00026900  |
| C  | -2.69815100 | -0.26482500 | -1.24329200 |
| C  | -2.82082200 | -0.97139500 | 0.00011500  |
| C  | -2.69818200 | -0.26455100 | 1.24335000  |
| C  | -2.42091900 | 1.12096800  | 1.23701400  |
| C  | -2.26216500 | 1.80660400  | -0.00023000 |
| C  | -2.42090700 | 1.12066900  | -1.23735200 |
| H  | 2.39692000  | 3.20835500  | -0.00045800 |
| Li | -0.80419900 | -0.03139600 | -0.00014300 |
| H  | 4.06699400  | 1.34684500  | -0.00015500 |

$Li@C_{36}^{6-5}ts1$

1 1

|    |             |             |             |
|----|-------------|-------------|-------------|
| C  | -1.67593000 | 1.41168100  | -1.80058700 |
| C  | -1.81997900 | 0.07970100  | -2.28839400 |
| C  | -0.68447700 | -0.77607400 | -2.41940900 |
| C  | -0.99541300 | -1.94753100 | -1.67533300 |
| C  | -0.11670400 | -2.41830300 | -0.65459800 |
| C  | -0.91461800 | -2.52942800 | 0.51575700  |
| C  | -0.53245600 | -1.87747800 | 1.72007900  |
| C  | -1.65593200 | -1.08597300 | 2.09900800  |
| C  | -1.51856400 | 0.30881900  | 2.33973400  |
| C  | -2.48253900 | 0.94085700  | 1.49654700  |
| C  | -2.08956100 | 1.94978600  | 0.56942800  |
| C  | -2.58125900 | 1.54038400  | -0.70542100 |
| C  | -0.35246000 | 1.98558600  | -1.70274300 |
| C  | 0.02108700  | 2.70281200  | -0.51756900 |
| C  | -0.76582600 | 2.52255300  | 0.67411600  |
| C  | 0.09493800  | 2.08239800  | 1.72383200  |
| C  | -0.19811300 | 0.87465600  | 2.44470400  |
| C  | 0.93787300  | 0.02111000  | 2.33177100  |
| C  | 0.79216500  | -1.30842300 | 1.81692900  |
| C  | 1.70066600  | -1.47283800 | 0.73226200  |
| C  | 1.20733200  | -1.84916400 | -0.54595800 |
| C  | 1.61376800  | -0.85462700 | -1.49935100 |
| C  | 0.63827300  | -0.21157600 | -2.31753200 |
| C  | 0.77123300  | 1.20588300  | -2.12852400 |
| C  | 1.87164800  | 1.43569200  | -1.16673500 |
| C  | 1.42801800  | 2.37187300  | -0.19799200 |
| C  | 1.46486200  | 1.96281400  | 1.16621300  |
| C  | 1.99153700  | 0.71811500  | 1.55810900  |
| C  | 2.51668800  | -0.20403800 | 0.58364300  |
| C  | 2.41998400  | 0.17694000  | -0.80586700 |
| C  | -2.90322000 | -0.62011700 | -1.53530100 |
| C  | -2.39582200 | -1.87070100 | -1.15575400 |
| C  | -2.35187300 | -2.23797200 | 0.19729600  |
| C  | -2.80438600 | -1.34048700 | 1.17272800  |
| C  | -3.31401800 | -0.08722700 | 0.80400400  |
| C  | -3.35336800 | 0.27529800  | -0.55165000 |
| H  | 6.24224400  | -0.67358000 | -1.19431100 |
| H  | 6.06758800  | 0.52898300  | -0.08276400 |
| N  | 5.57707300  | -0.23130400 | -0.55672600 |
| B  | 4.98338600  | -1.31704800 | 0.47781300  |
| H  | 5.79817800  | -1.55793300 | 1.32093400  |
| H  | 4.51433100  | -2.22170000 | -0.15897400 |
| H  | 4.82844000  | 0.17640600  | -1.13007400 |
| H  | 4.01913200  | -0.68632700 | 1.02304300  |
| Li | 0.26410900  | 0.46283600  | 0.02183400  |

$Li@C_{36}^{6-5}ts2$

1 1

|   |             |             |             |
|---|-------------|-------------|-------------|
| C | -0.51945100 | -2.25266500 | -1.22502300 |
| C | -0.81631900 | -2.64681600 | 0.11756100  |
| C | 0.00190000  | -2.16635700 | 1.19280800  |
| C | -0.83115100 | -1.50540700 | 2.14686600  |
| C | -0.54720800 | -0.15260400 | 2.51217800  |

|    |             |             |             |
|----|-------------|-------------|-------------|
| C  | -1.71368100 | 0.64683300  | 2.28670200  |
| C  | -1.61289600 | 1.79586200  | 1.44731300  |
| C  | -2.57713400 | 1.67311500  | 0.38100700  |
| C  | -2.13862600 | 1.73174900  | -0.98020300 |
| C  | -2.57224600 | 0.54103200  | -1.66492000 |
| C  | -1.58521300 | -0.29015600 | -2.31003400 |
| C  | -1.69016100 | -1.62764800 | -1.79576900 |
| C  | 0.78109500  | -1.71873200 | -1.53090600 |
| C  | 0.87664000  | -0.54489100 | -2.28637100 |
| C  | -0.27885500 | 0.25202600  | -2.57423600 |
| C  | 0.01554100  | 1.58340800  | -2.14615300 |
| C  | -0.83643000 | 2.27547900  | -1.27018300 |
| C  | 0.02071300  | 2.66994700  | -0.16693500 |
| C  | -0.30632300 | 2.34164900  | 1.16894800  |
| C  | 0.86176100  | 1.70267200  | 1.71386400  |
| C  | 0.75892300  | 0.41477900  | 2.24183000  |
| C  | 1.73241200  | -0.37651200 | 1.51713700  |
| C  | 1.30795900  | -1.62432500 | 0.89975200  |
| C  | 1.72274400  | -1.51905500 | -0.43095300 |
| C  | 2.51349100  | -0.28696700 | -0.59659000 |
| C  | 1.94682700  | 0.33056700  | -1.69083200 |
| C  | 1.42340500  | 1.65832500  | -1.62918300 |
| C  | 1.41003300  | 2.32571900  | -0.43701900 |
| C  | 2.11201100  | 1.86707100  | 0.82637600  |
| C  | 2.62315500  | 0.39838500  | 0.71222000  |
| C  | -2.21448700 | -2.23643200 | 0.40075100  |
| C  | -2.22267400 | -1.54978900 | 1.63167600  |
| C  | -2.75730100 | -0.23370300 | 1.71109800  |
| C  | -3.28601800 | 0.39151900  | 0.55953500  |
| C  | -3.27720300 | -0.29799100 | -0.69233100 |
| C  | -2.73806300 | -1.61327900 | -0.76920100 |
| H  | 5.92081600  | 0.18521700  | 0.77740500  |
| H  | 5.37317000  | -1.21740900 | 1.49118500  |
| N  | 5.21146100  | -0.55003400 | 0.73371000  |
| B  | 5.03901600  | -1.17487700 | -0.63822500 |
| H  | 4.70647000  | -2.30873900 | -0.67035800 |
| H  | 5.33664300  | -0.50988700 | -1.56809600 |
| H  | 4.19011000  | -0.04301400 | 0.94894400  |
| Li | -1.18829400 | -0.23560400 | 0.07679600  |
| H  | 2.83934400  | 2.58442400  | 1.22101400  |

$Li@C_{36}^{6-5}1$

1 1

|   |             |             |             |
|---|-------------|-------------|-------------|
| C | 0.19826000  | -2.31193700 | 1.07541000  |
| C | 0.58775600  | -2.66379000 | -0.24765300 |
| C | -0.10015800 | -2.05965900 | -1.34905200 |
| C | 0.85990800  | -1.39782000 | -2.18195000 |
| C | 0.72965500  | -0.01393800 | -2.52089800 |
| C | 1.93902500  | 0.66417200  | -2.15151500 |
| C | 1.85173200  | 1.77190800  | -1.26274000 |
| C | 2.70521500  | 1.50700000  | -0.11159100 |
| C | 2.15598200  | 1.53712200  | 1.21624800  |
| C | 2.43761600  | 0.28389200  | 1.86997600  |

|    |             |             |             |
|----|-------------|-------------|-------------|
| C  | 1.33084100  | -0.49383700 | 2.37779200  |
| C  | 1.36533900  | -1.80065300 | 1.78045200  |
| C  | -1.07747100 | -1.68147400 | 1.27296000  |
| C  | -1.13959700 | -0.54626500 | 2.11131500  |
| C  | 0.05722300  | 0.13886900  | 2.55829100  |
| C  | -0.10115300 | 1.50796600  | 2.20654100  |
| C  | 0.87344900  | 2.15318400  | 1.40796700  |
| C  | 0.17012700  | 2.69356400  | 0.25619200  |
| C  | 0.57305100  | 2.39860100  | -1.07181300 |
| C  | -0.59251800 | 1.93241000  | -1.80164400 |
| C  | -0.53279800 | 0.65510700  | -2.33265200 |
| C  | -1.64248000 | -0.12661800 | -1.73832400 |
| C  | -1.38572200 | -1.44943700 | -1.12477100 |
| C  | -1.95389300 | -1.42576800 | 0.13840200  |
| C  | -2.78105100 | -0.14317100 | 0.33735800  |
| C  | -2.01185600 | 0.41935300  | 1.47877200  |
| C  | -1.43535400 | 1.69094200  | 1.57704900  |
| C  | -1.22462600 | 2.37622000  | 0.38228800  |
| C  | -1.87582500 | 2.08952200  | -0.94922900 |
| C  | -2.37324000 | 0.64578200  | -0.89596500 |
| C  | 2.02442600  | -2.33052600 | -0.38378000 |
| C  | 2.19847800  | -1.59186500 | -1.57440600 |
| C  | 2.83579700  | -0.32846400 | -1.52740200 |
| C  | 3.32008100  | 0.19624400  | -0.29653800 |
| C  | 3.15163900  | -0.55557400 | 0.90791000  |
| C  | 2.49841300  | -1.82417800 | 0.85993500  |
| H  | -4.92455900 | -0.68849800 | -1.45806300 |
| H  | -6.06593900 | -1.23123000 | -0.40299100 |
| N  | -5.05819400 | -1.14244100 | -0.55121300 |
| B  | -4.40985700 | -0.30153100 | 0.68041700  |
| Li | 1.13453300  | -0.21884900 | 0.03381700  |
| H  | -2.59199500 | 2.84848400  | -1.28396900 |
| H  | -4.67860100 | -2.08977700 | -0.61897300 |
| H  | -4.93472500 | 0.77940800  | 0.68842700  |
| H  | -4.56875900 | -0.95839900 | 1.67290700  |

$Li@C_{36}^{6-5}$

|    |             |             |             |
|----|-------------|-------------|-------------|
| 11 |             |             |             |
| C  | 0.92645800  | -2.31238700 | -0.78659700 |
| C  | 1.72470900  | -1.46092000 | -1.62482500 |
| C  | 1.08503700  | -0.39592200 | -2.35034200 |
| C  | 1.72269200  | 0.84803700  | -2.01391500 |
| C  | 0.92354100  | 1.92785800  | -1.50254700 |
| C  | 1.44639600  | 2.32749000  | -0.23030000 |
| C  | 0.58833500  | 2.32527900  | 0.91893300  |
| C  | 1.17809700  | 1.50811200  | 1.93221200  |
| C  | 0.42660300  | 0.41772400  | 2.46970900  |
| C  | 1.17941500  | -0.78874100 | 2.31888000  |
| C  | 0.59088000  | -1.89314900 | 1.63036900  |
| C  | 1.45040600  | -2.27335200 | 0.54622100  |
| C  | -0.50129300 | -2.35610500 | -0.98025200 |
| C  | -1.36504800 | -2.24968400 | 0.17280900  |
| C  | -0.84121100 | -1.91491400 | 1.44561900  |

|    |             |             |             |
|----|-------------|-------------|-------------|
| C  | -1.63713800 | -0.82223800 | 1.89875300  |
| C  | -1.01086900 | 0.38555100  | 2.28520900  |
| C  | -1.63777200 | 1.39859300  | 1.52323000  |
| C  | -0.84329700 | 2.28326500  | 0.73641200  |
| C  | -1.36715600 | 2.18014000  | -0.57514200 |
| C  | -0.50370900 | 1.90380500  | -1.69975900 |
| C  | -1.09116000 | 0.77266300  | -2.29185900 |
| C  | -0.34659700 | -0.42474500 | -2.51329800 |
| C  | -1.09044300 | -1.48395900 | -1.91090300 |
| C  | -2.39058700 | -0.96109400 | -1.35639900 |
| C  | -2.57021000 | -1.46023100 | -0.10728000 |
| C  | -2.93345500 | -0.61928000 | 1.09802800  |
| C  | -2.93414500 | 0.94403600  | 0.83363100  |
| C  | -2.57162800 | 1.34220900  | -0.58101500 |
| C  | -2.39112900 | 0.45970600  | -1.59662300 |
| C  | 2.76593600  | -0.85056600 | -0.78099700 |
| C  | 2.76486300  | 0.54882300  | -1.01695700 |
| C  | 2.60386100  | 1.45549700  | 0.07271400  |
| C  | 2.43705400  | 0.95788900  | 1.38393400  |
| C  | 2.43760300  | -0.44745400 | 1.62161600  |
| C  | 2.60479200  | -1.34817700 | 0.54651100  |
| Li | 0.89645400  | -0.00834800 | 0.01434200  |
| H  | -3.83390100 | -0.93653100 | 1.63029900  |
| H  | -3.83443600 | 1.41903400  | 1.23197800  |
